# Supplementary material
Source: PubMed Central journal article supplement (PMC4111259)

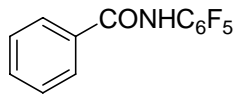

### NMR of compound 3aa

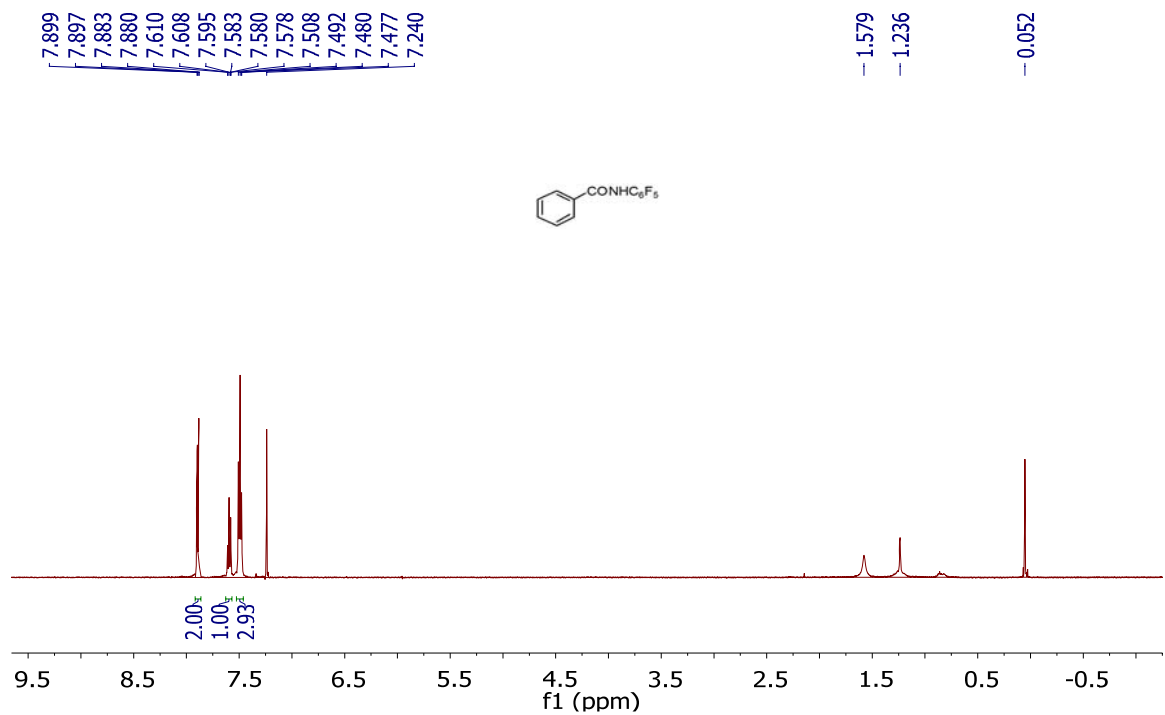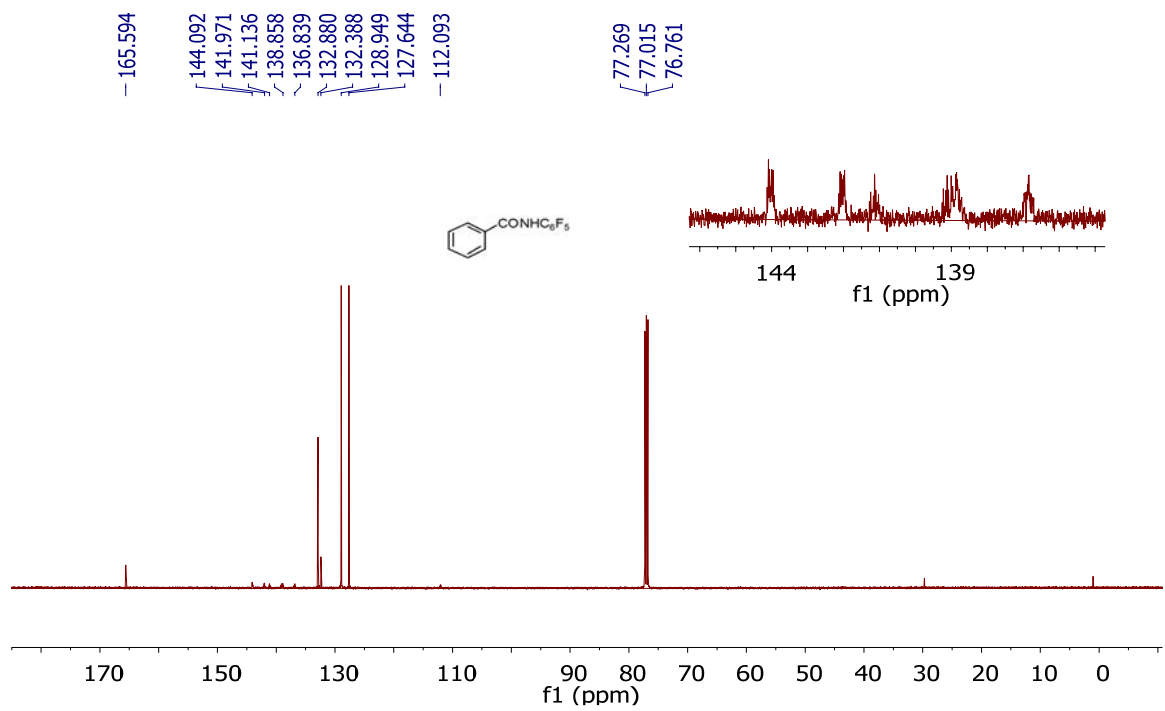

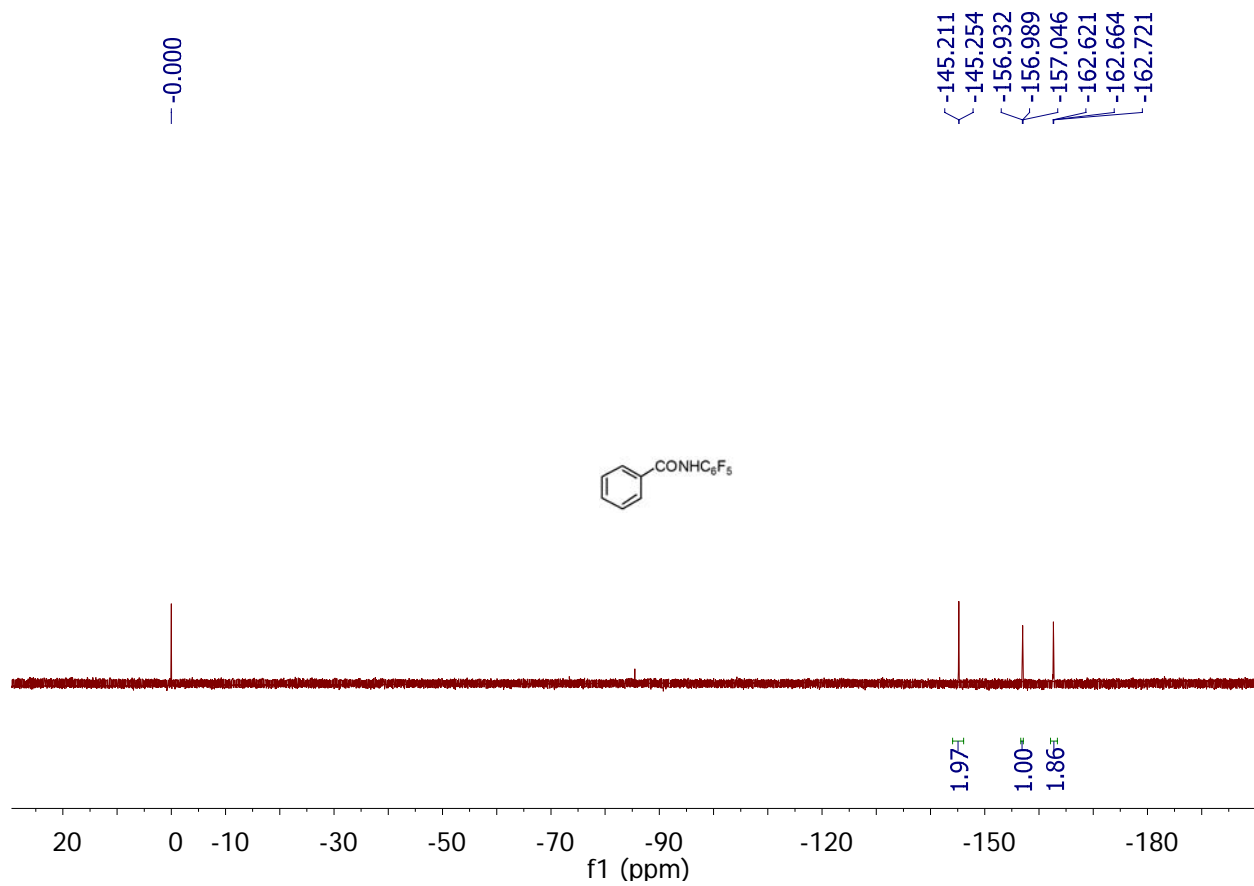

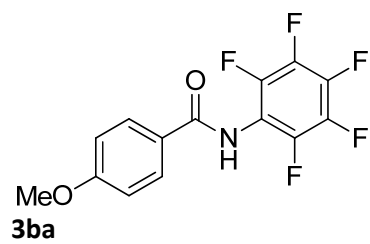

**NMR of compound 3ba**

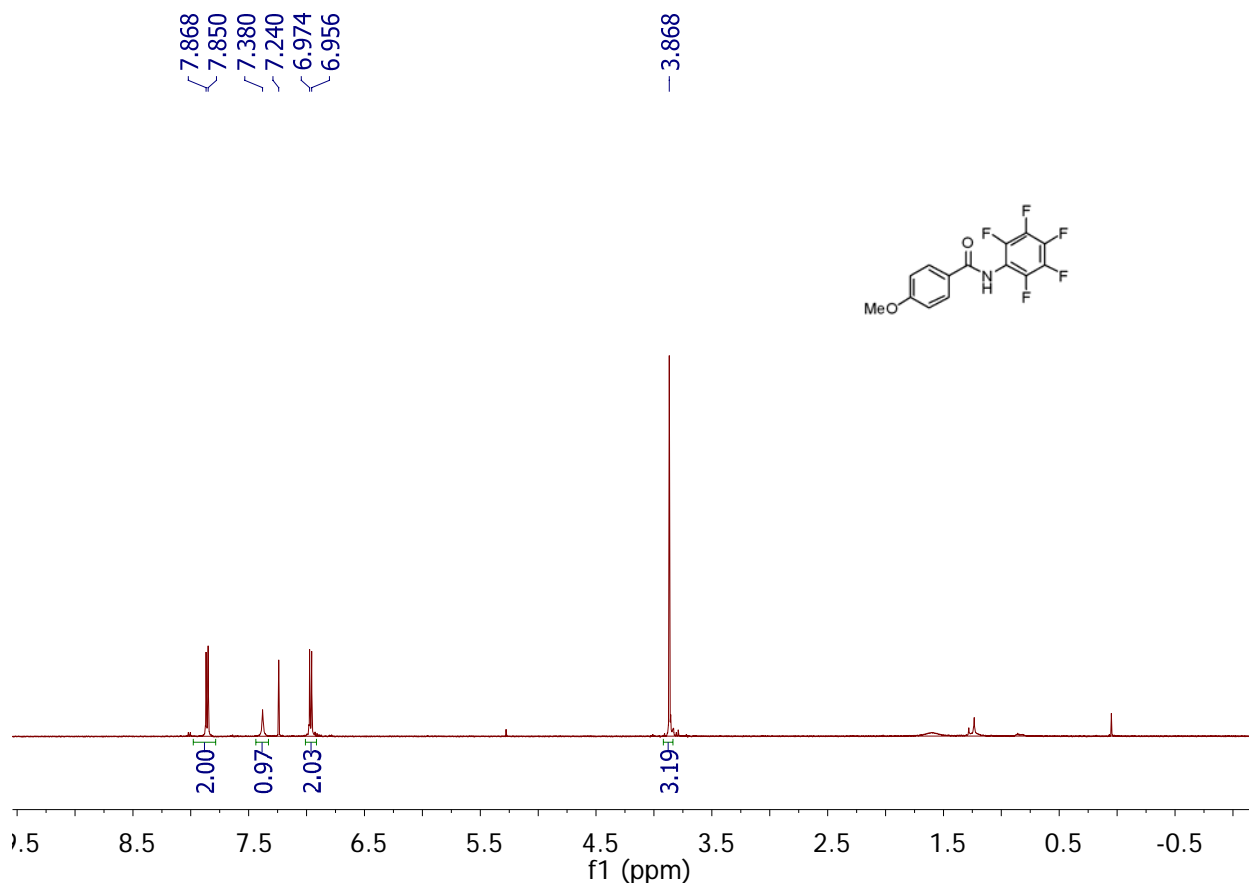

165.069  
163.263  
143.930  
142.002  
140.931  
138.913  
138.812  
136.803  
129.668  
124.512  
114.100  
112.332  
77.255  
77.000  
76.746  
55.528

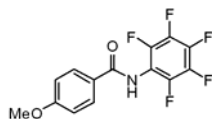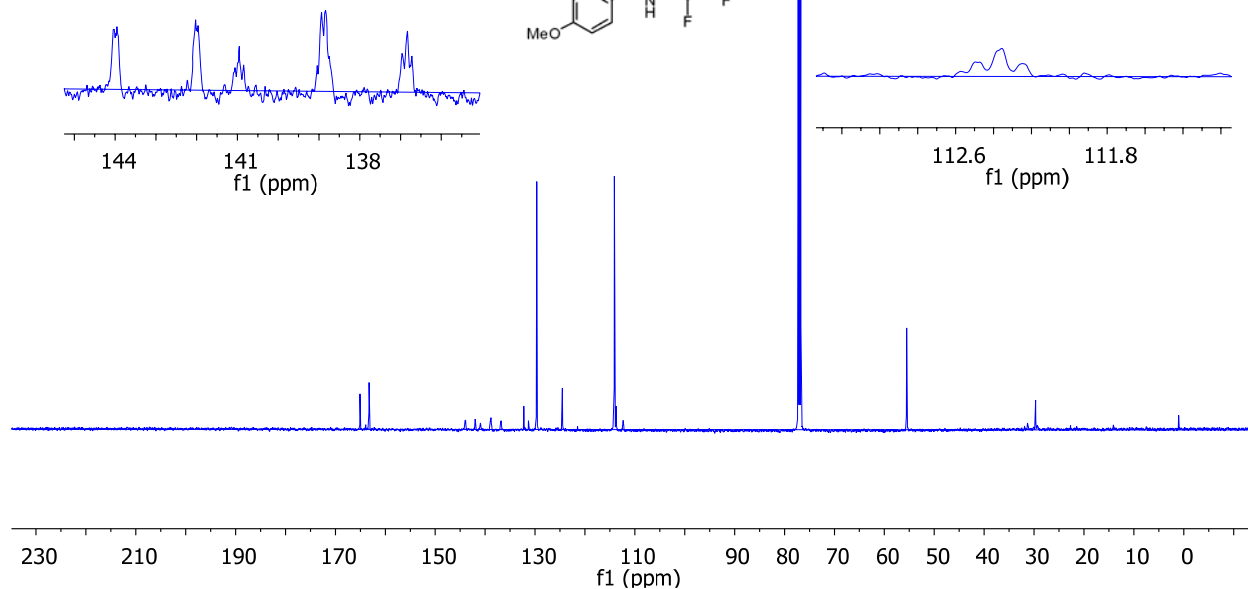

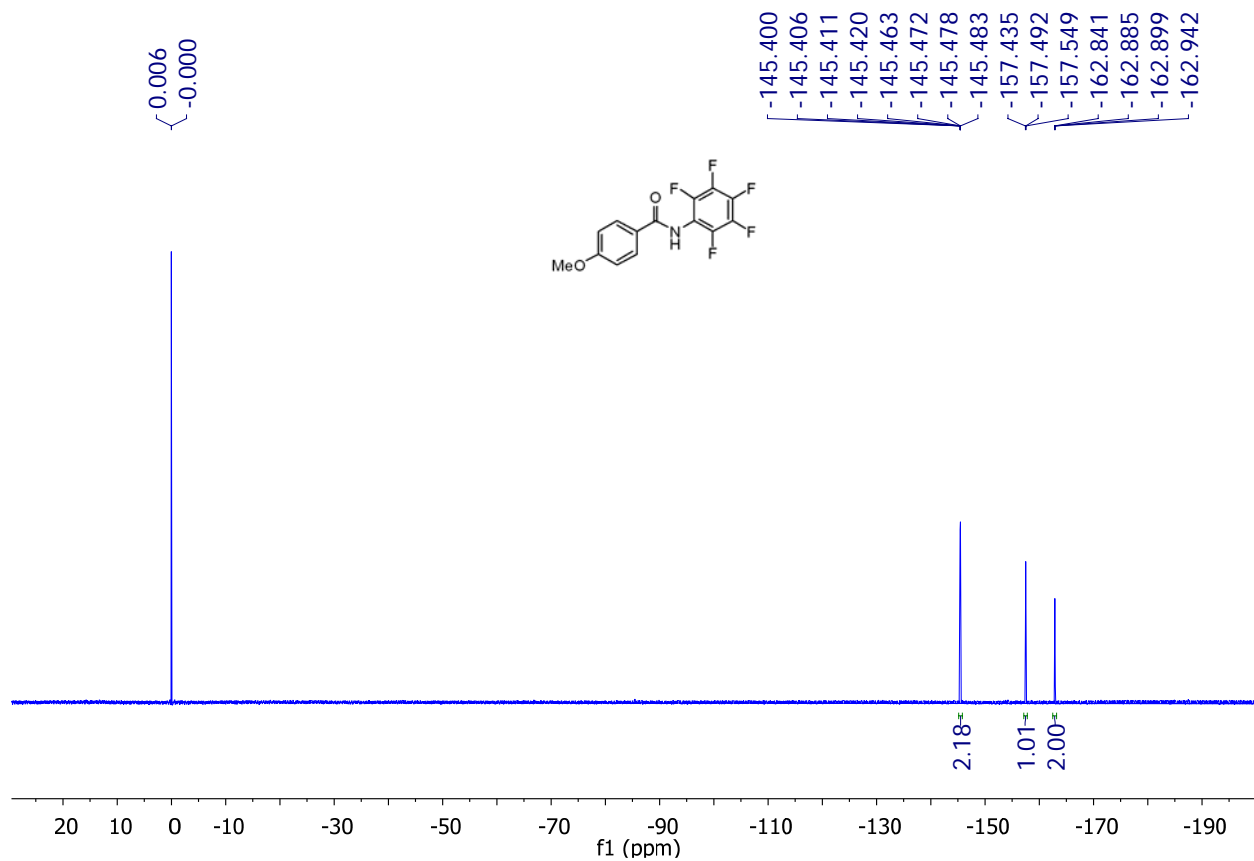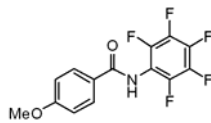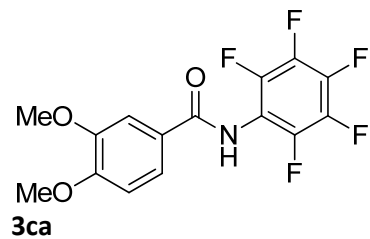

**NMR of compound 3ca**

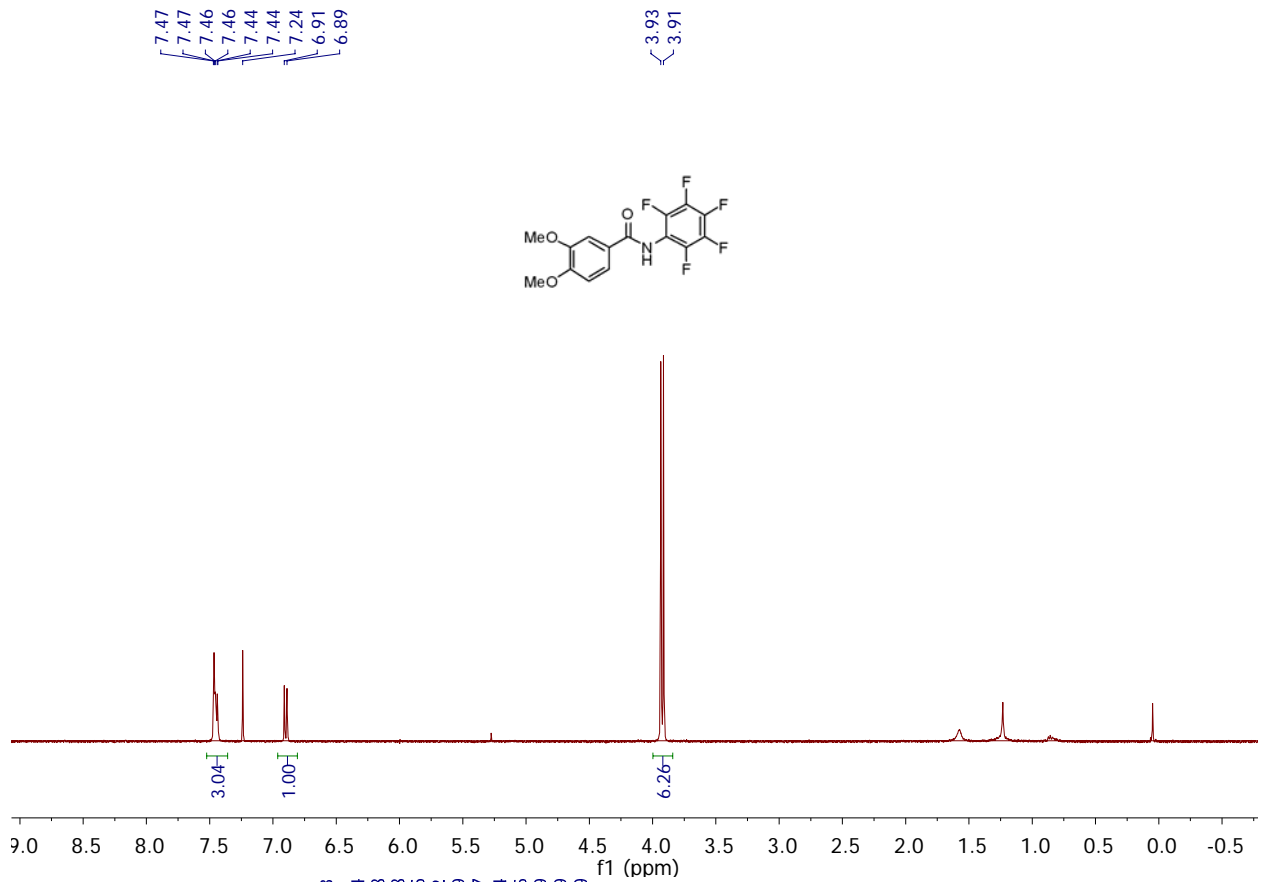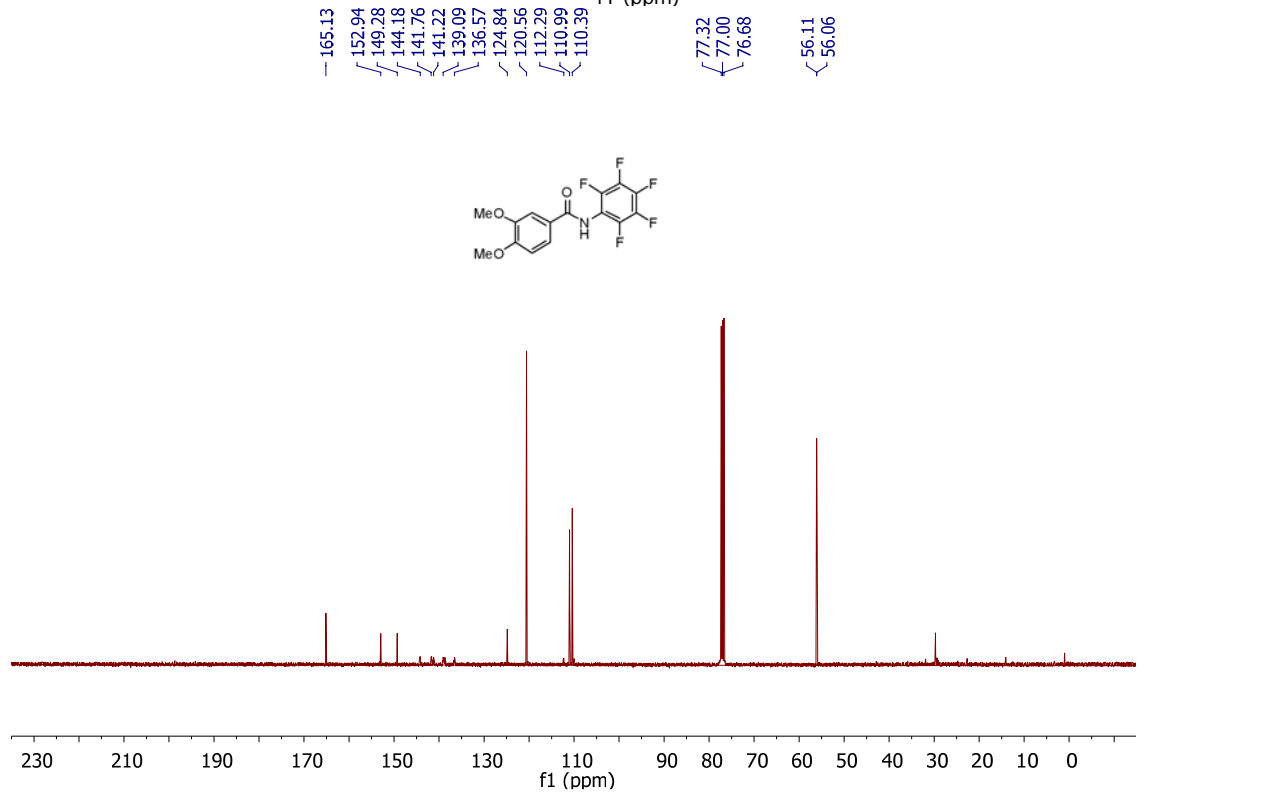

-145.42  
-145.43  
-145.44  
-145.49  
-145.50  
-145.51

-157.26  
-157.32  
-157.38

-162.75  
-162.77  
-162.78  
-162.82  
-162.83  
-162.85  
-162.88  
-162.89  
-162.90

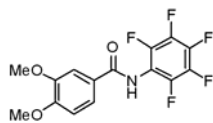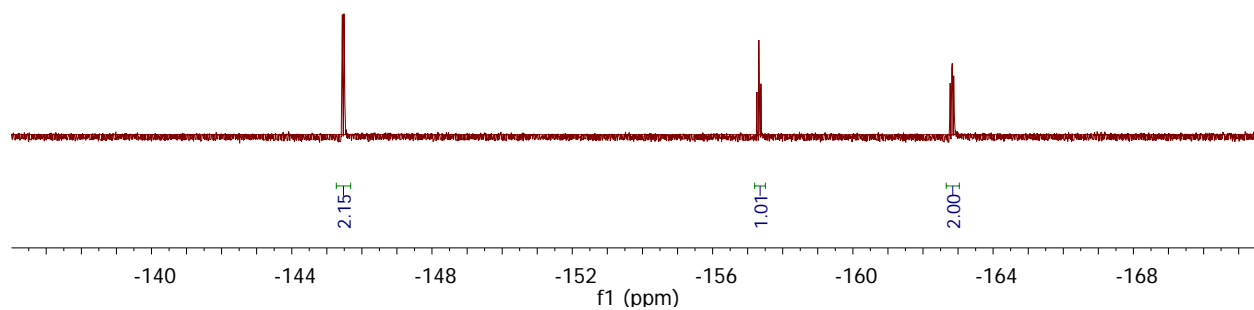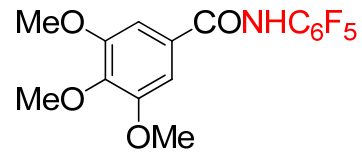

3da

NMR of compound 3da

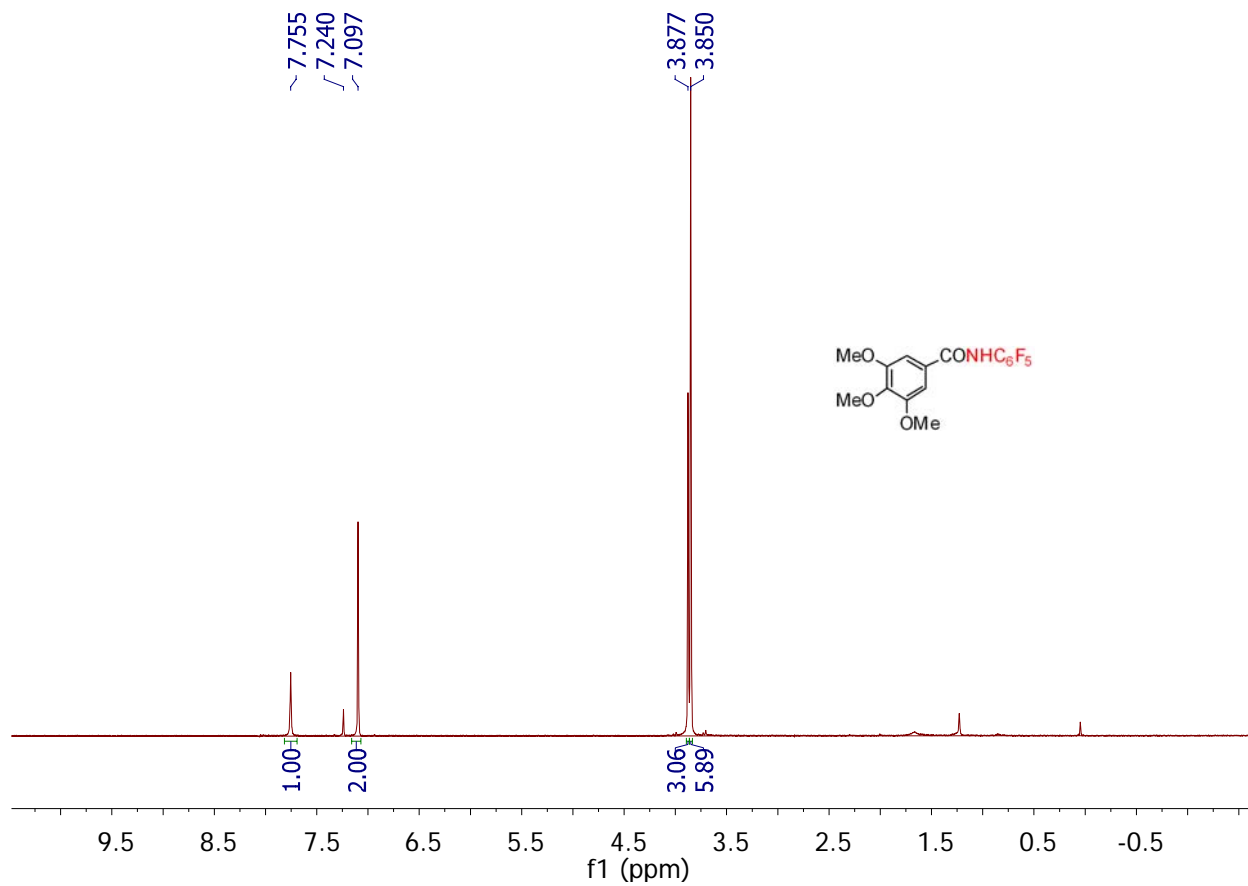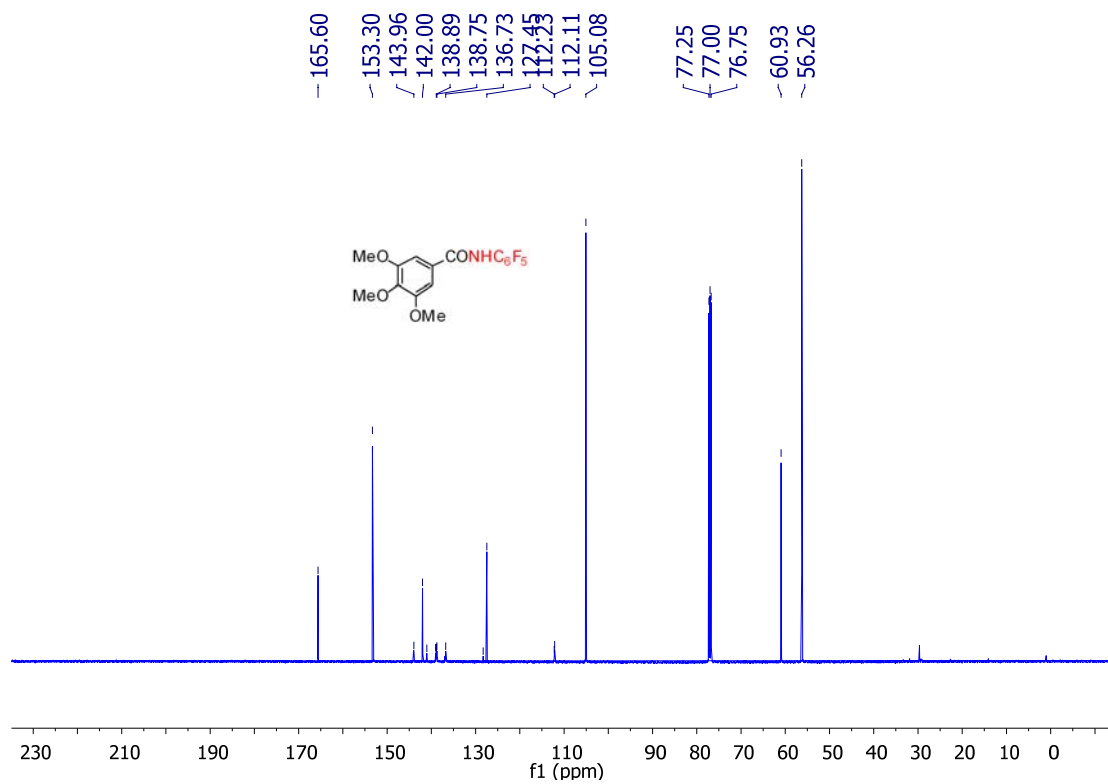



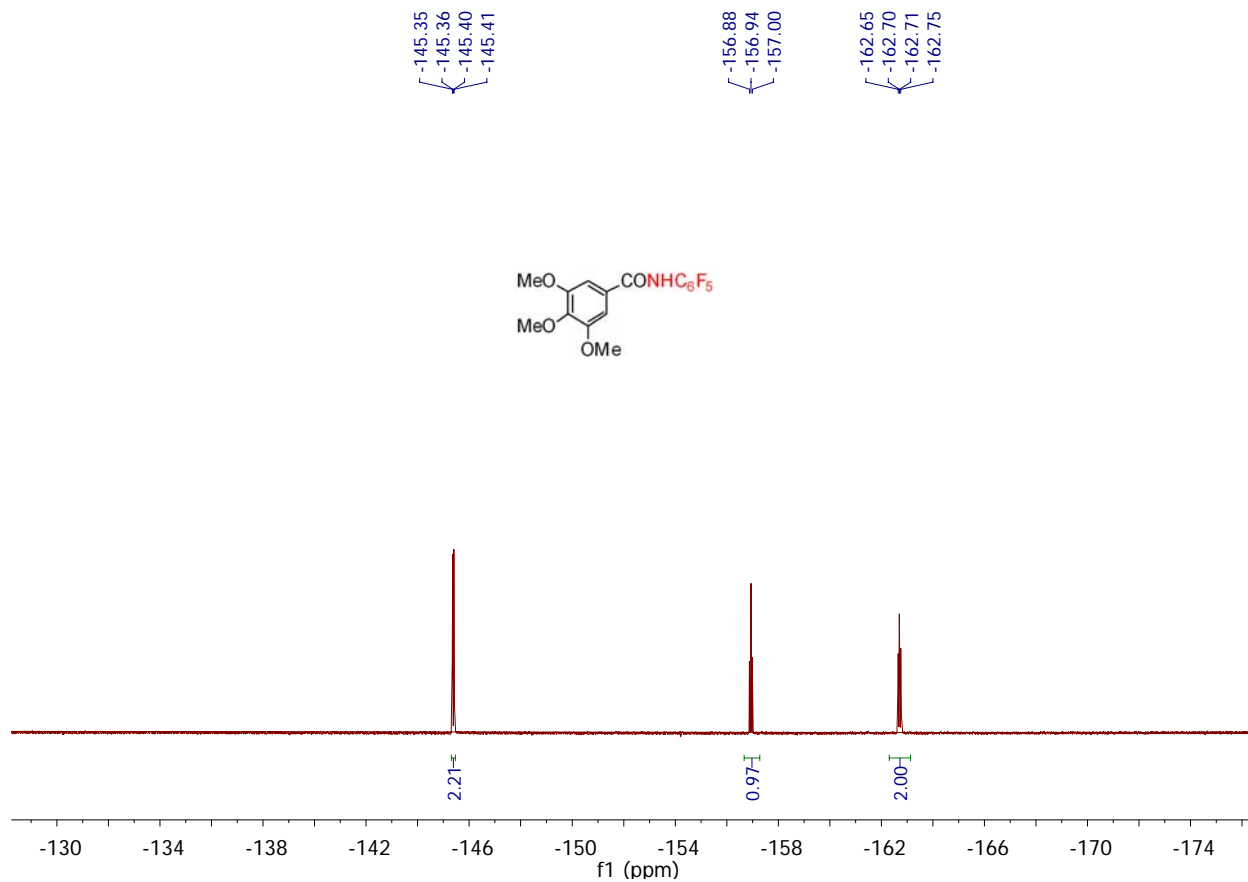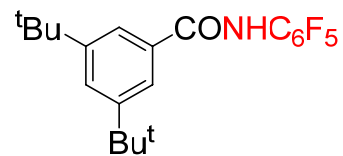

3ea

NMR of compound 3ea

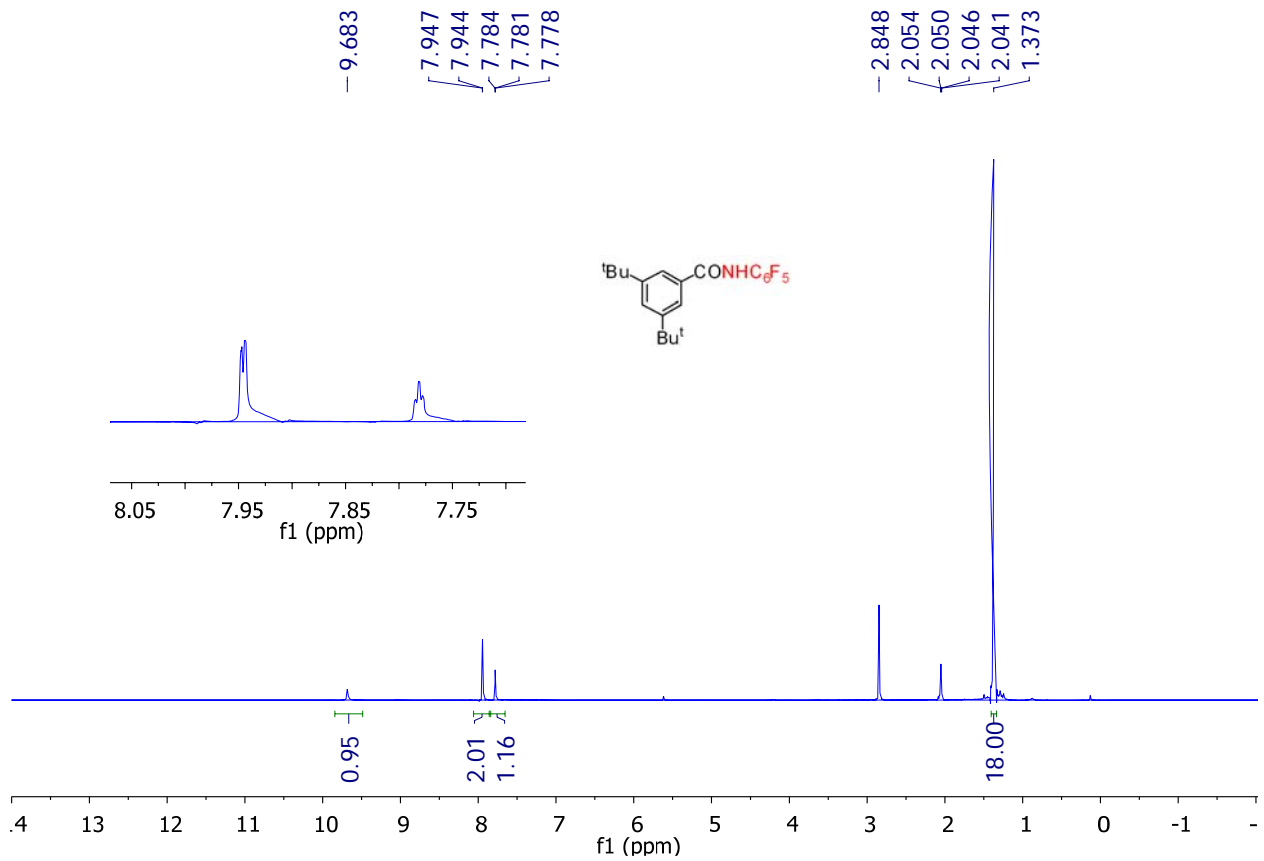

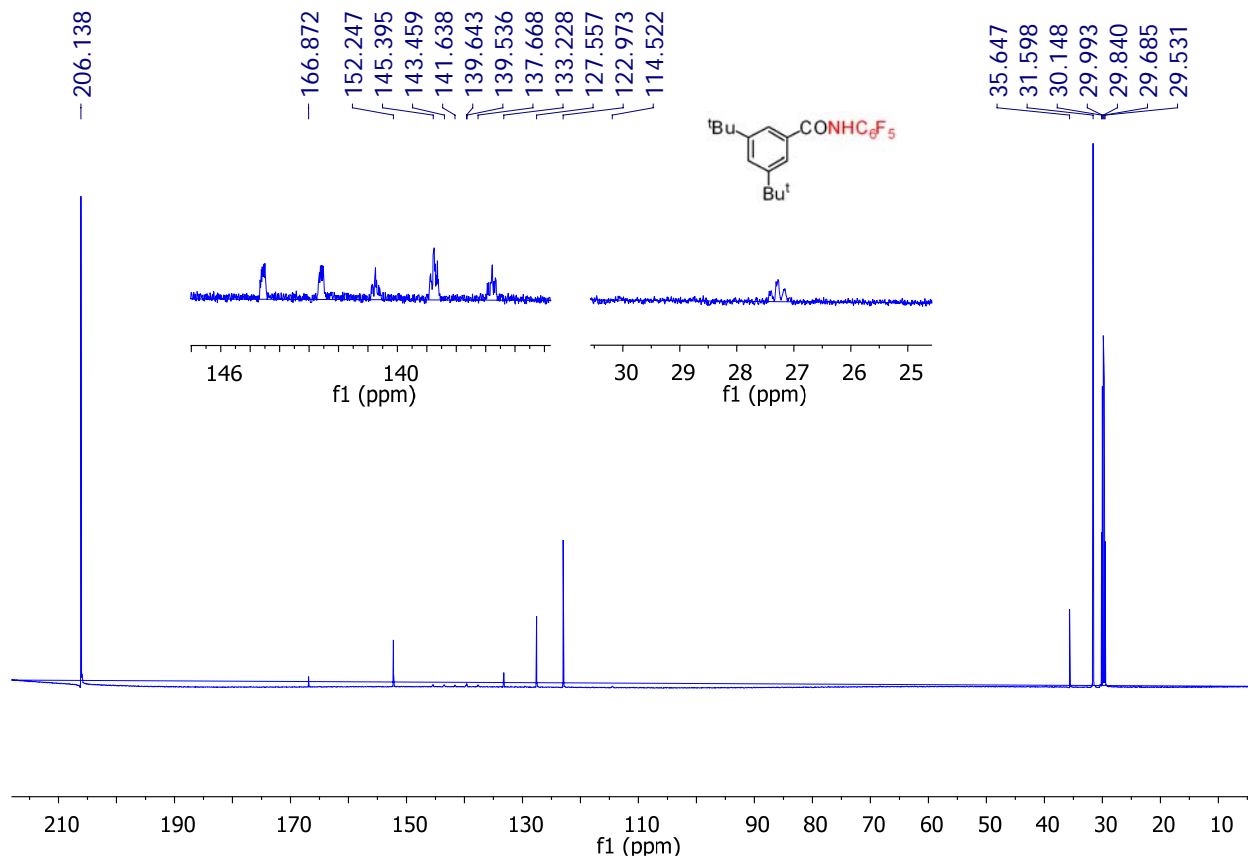

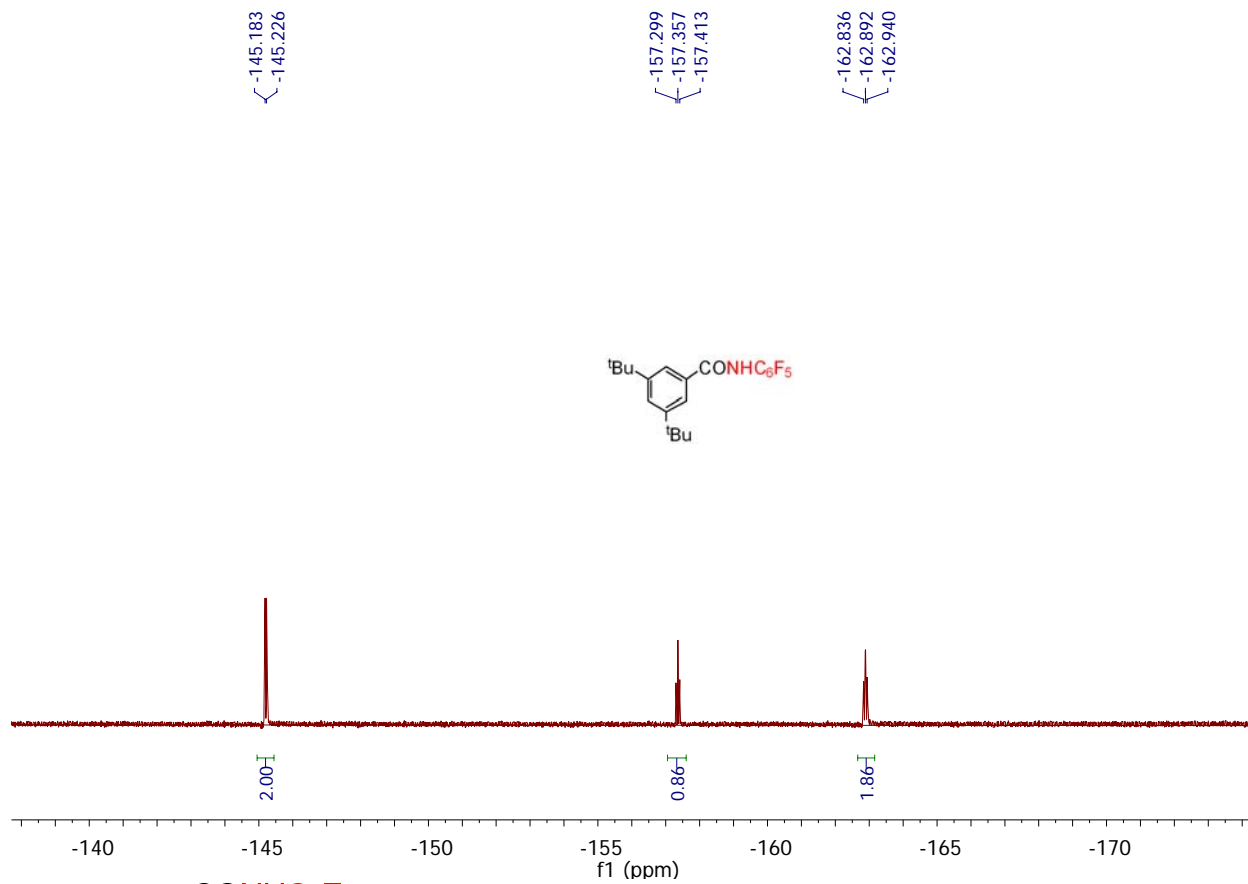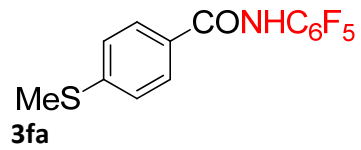

**NMR of compound 3fa**

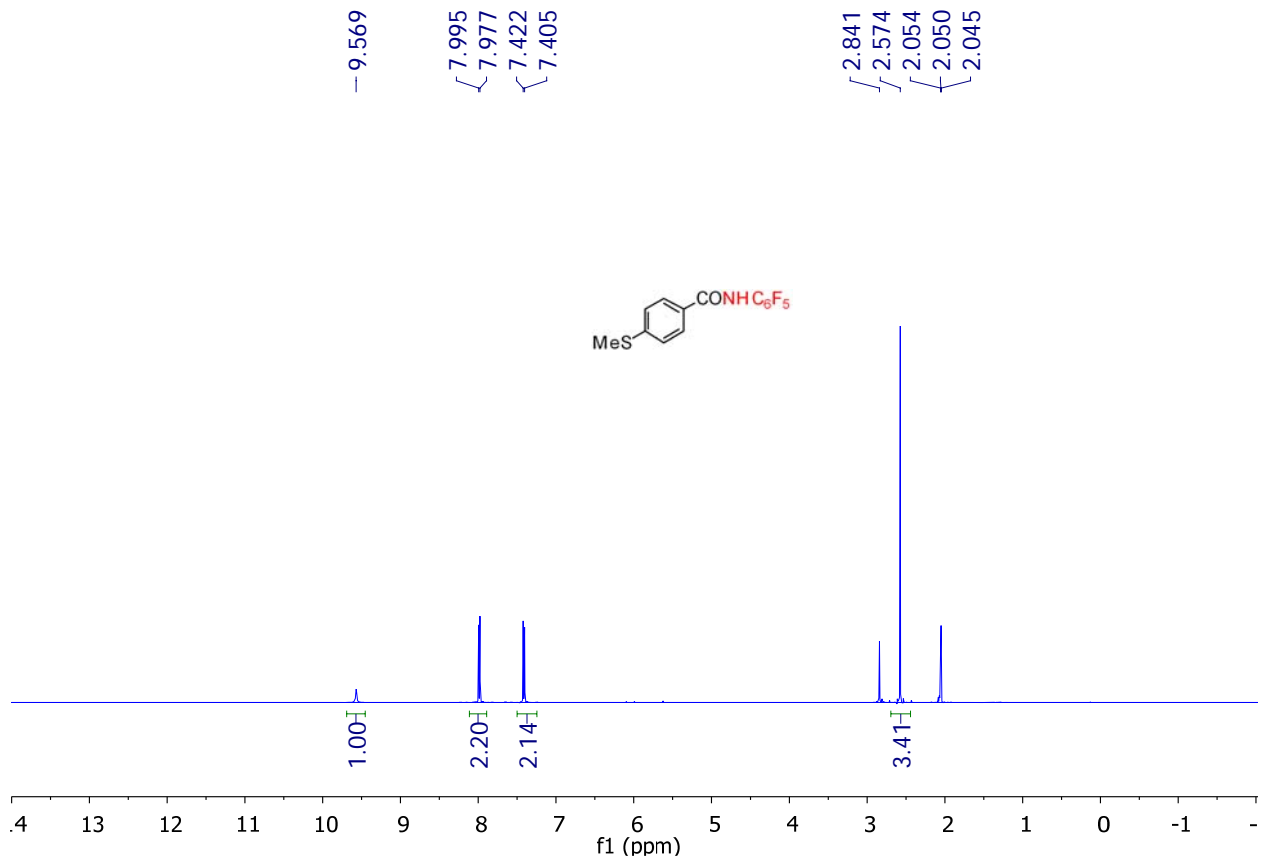

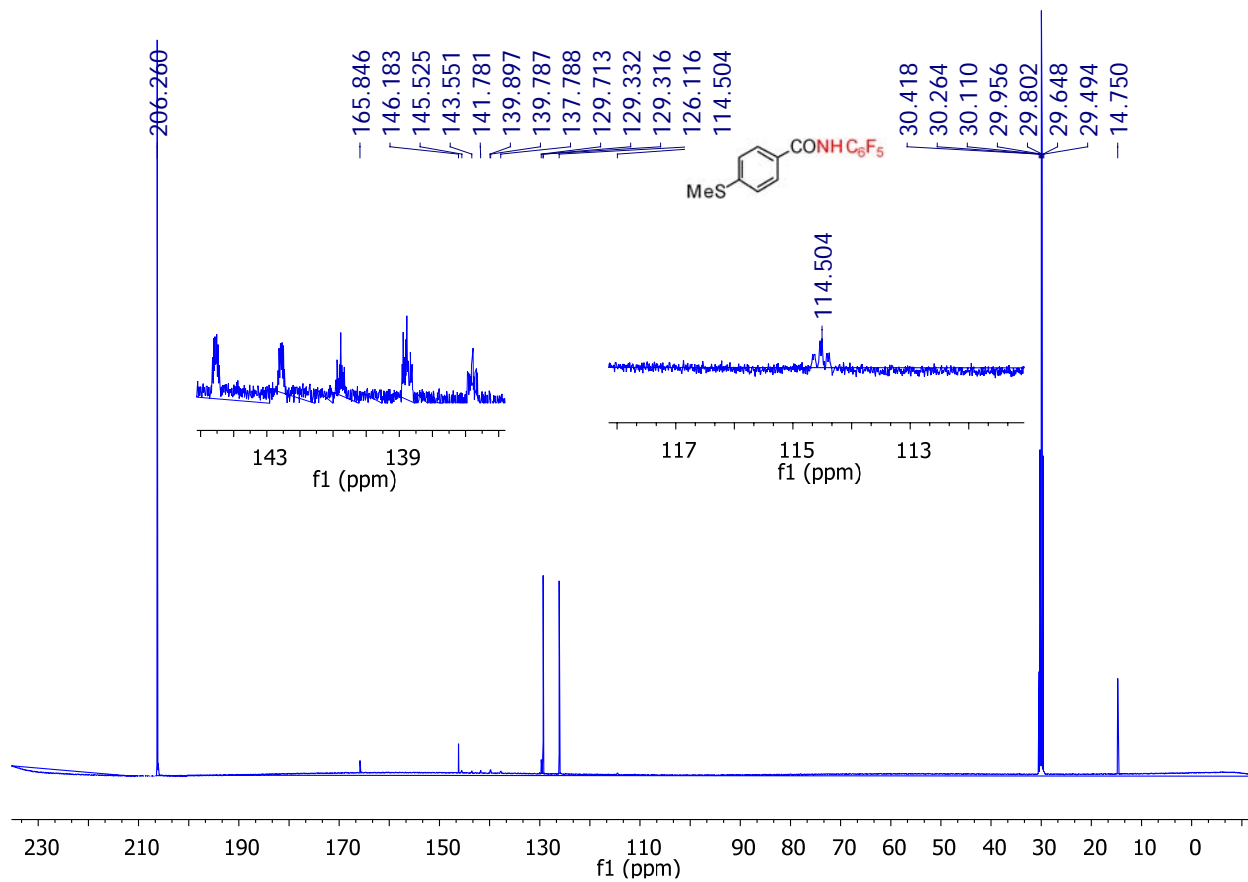

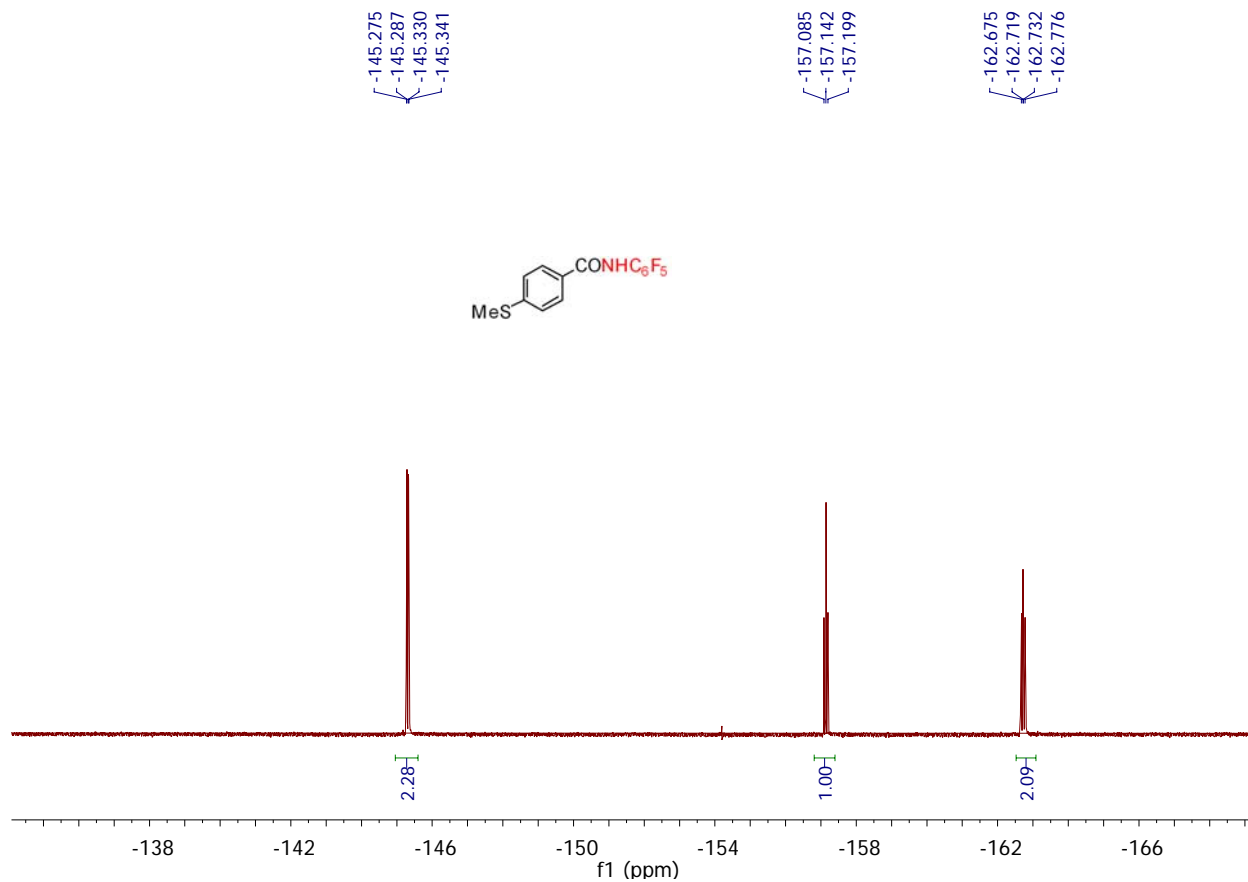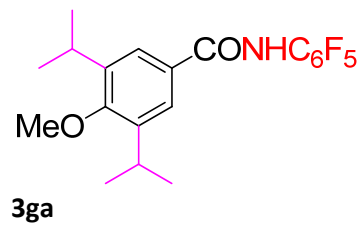

NMR of compound 3ga

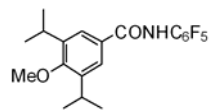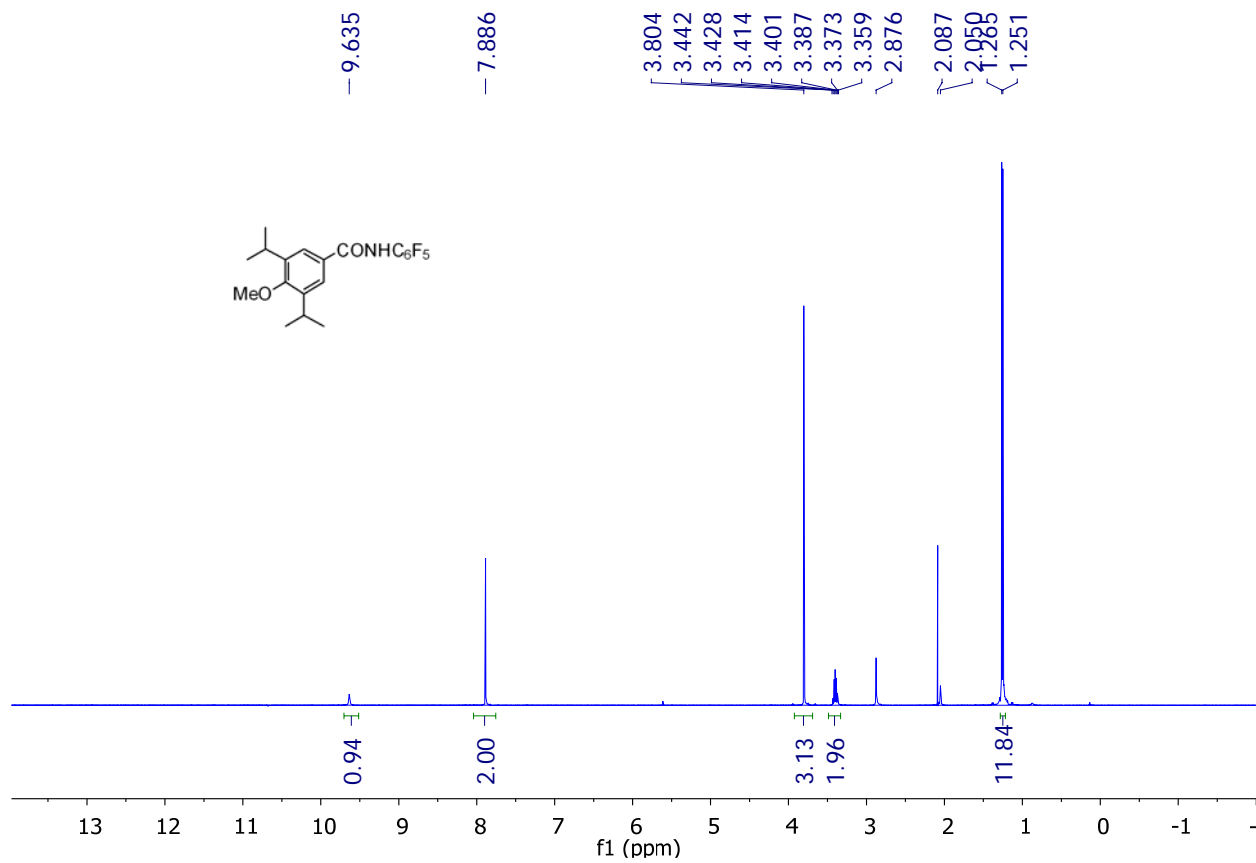



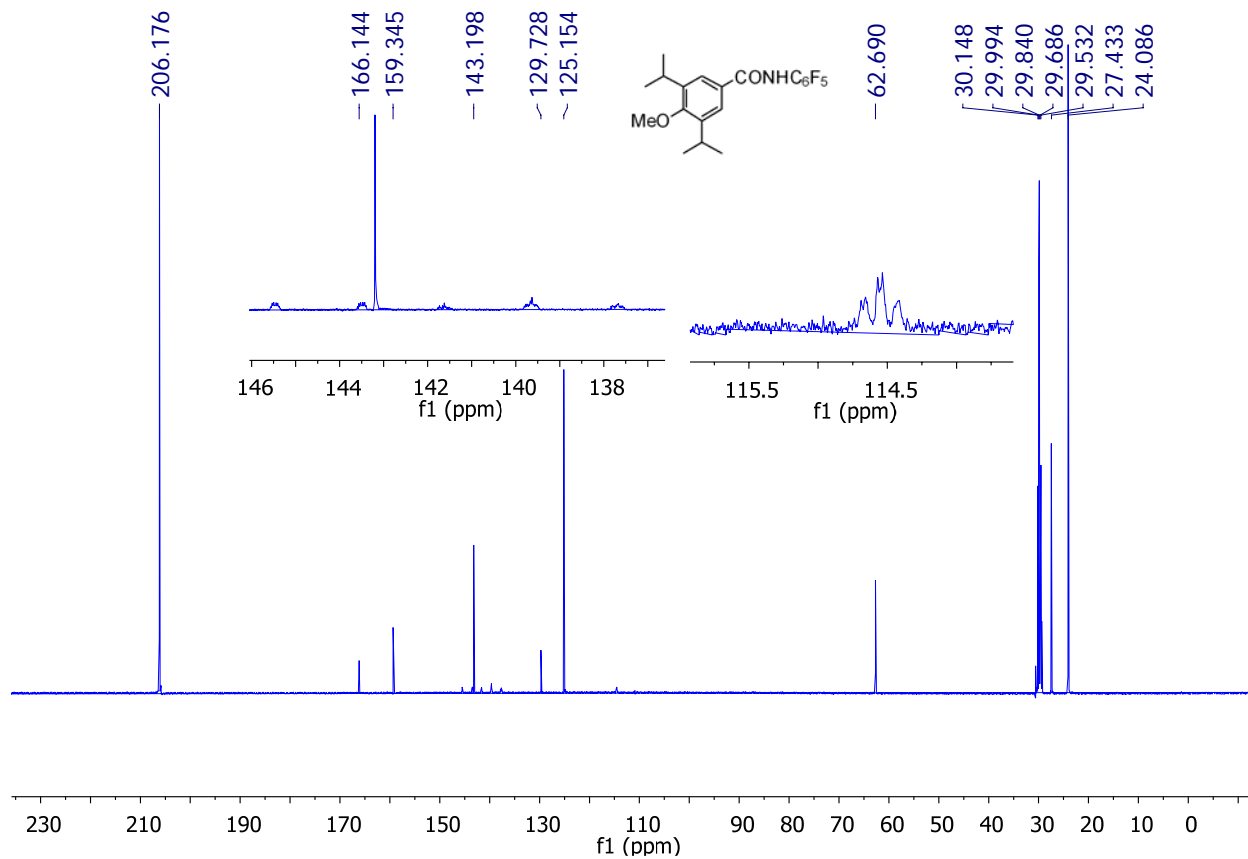

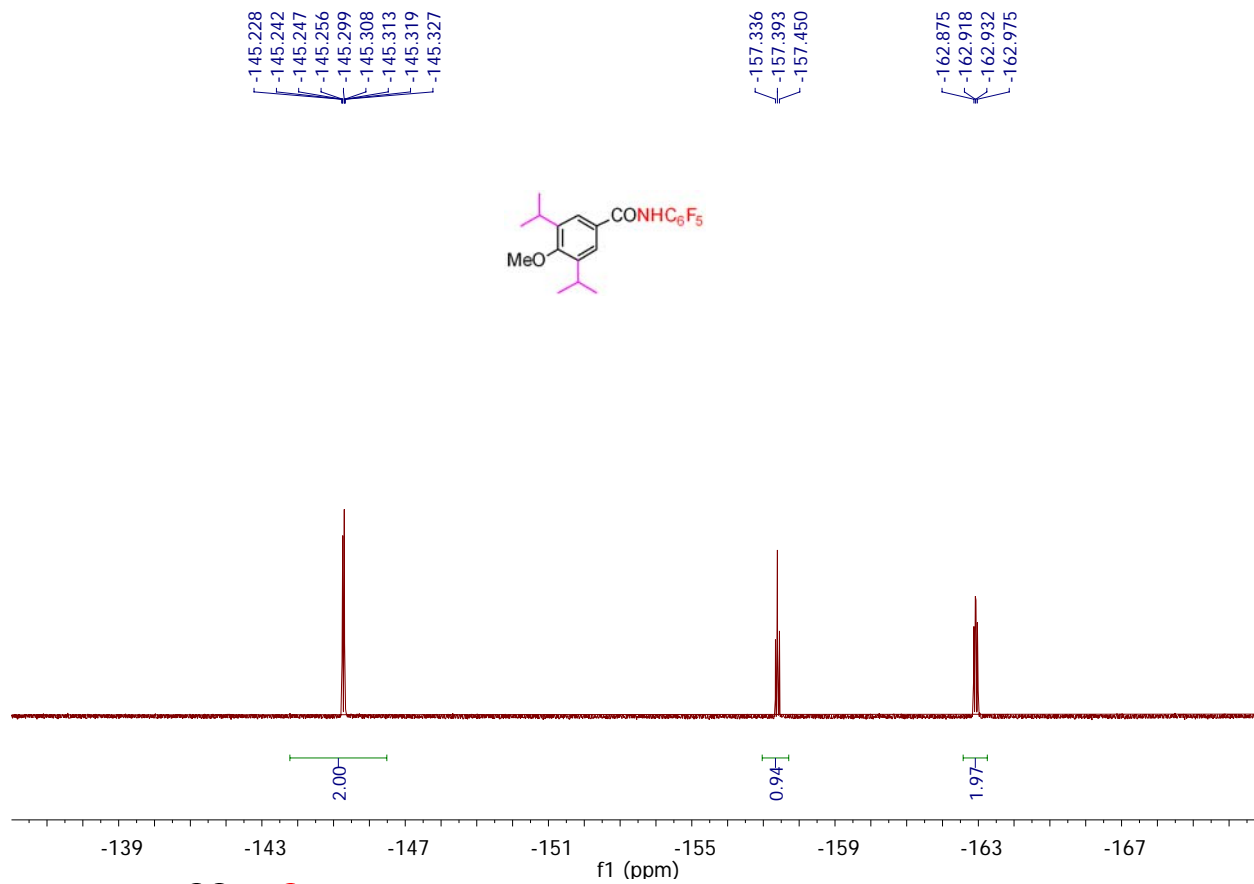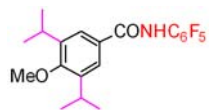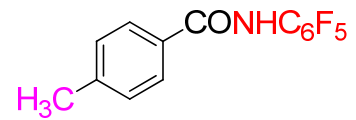

3ha

NMR of compound 3ha

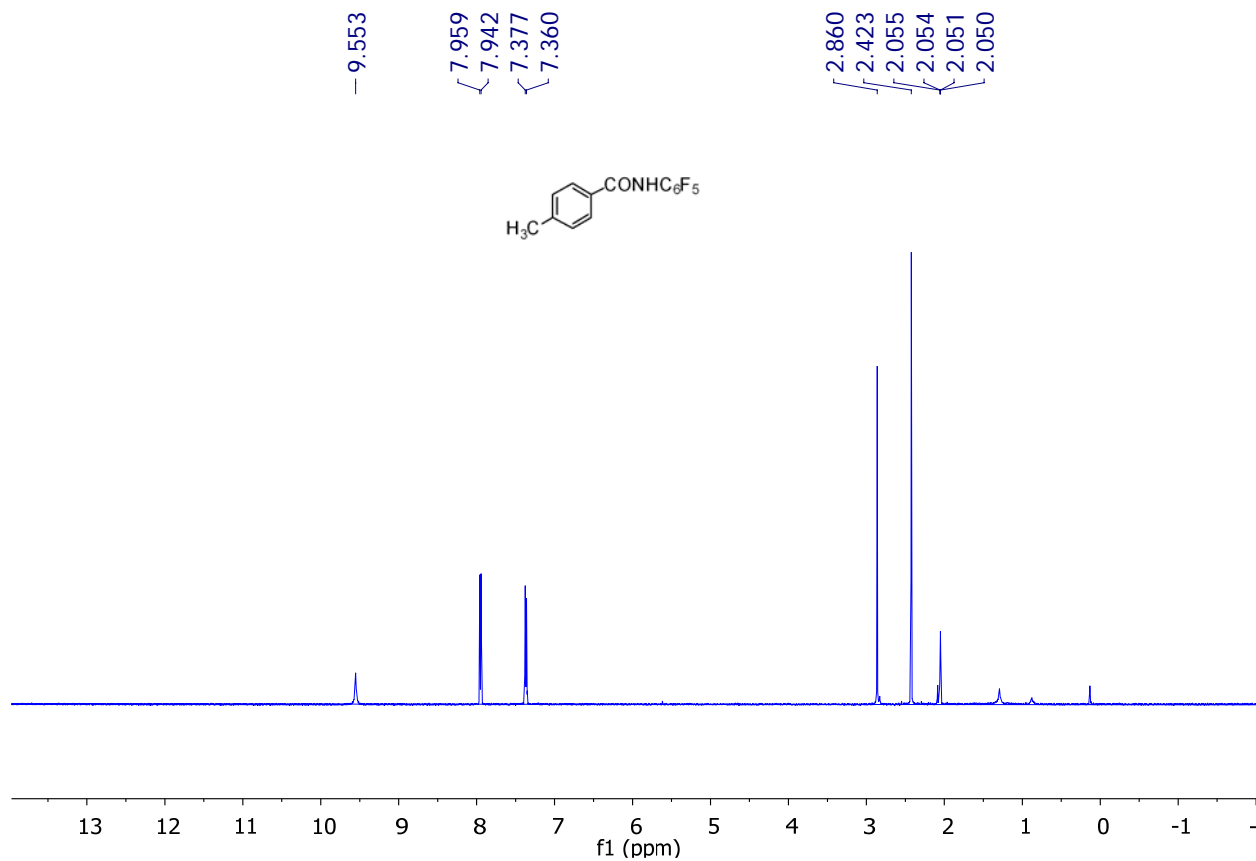

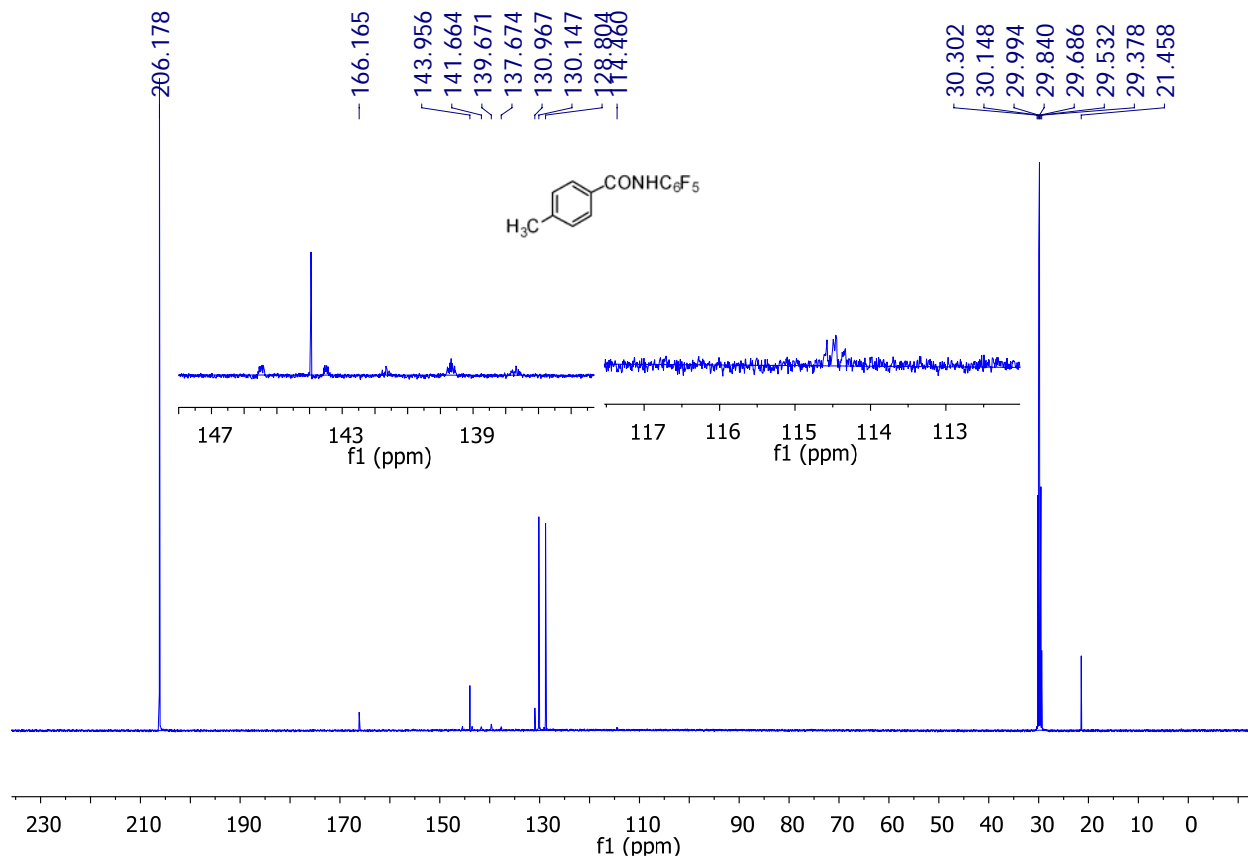

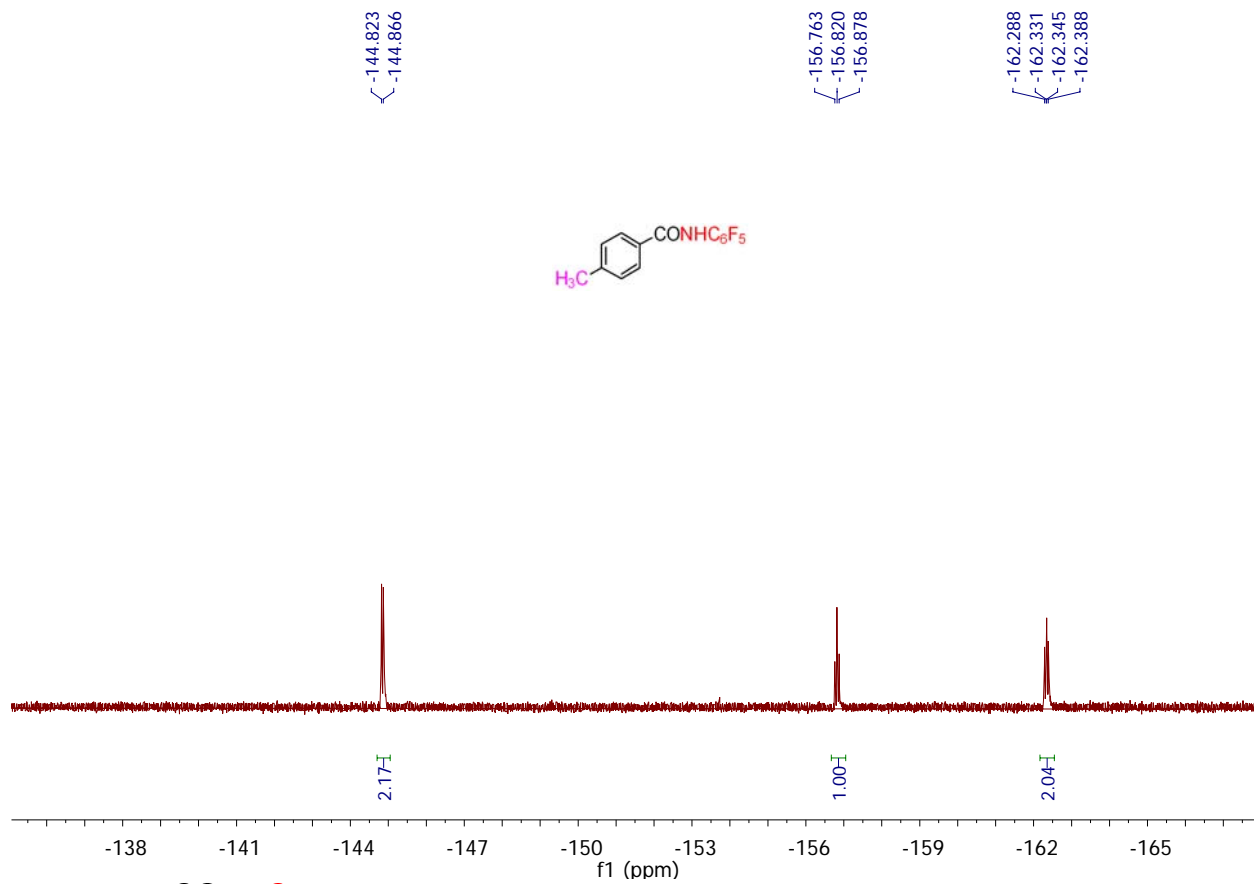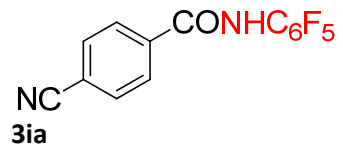

NMR of compound 3ia

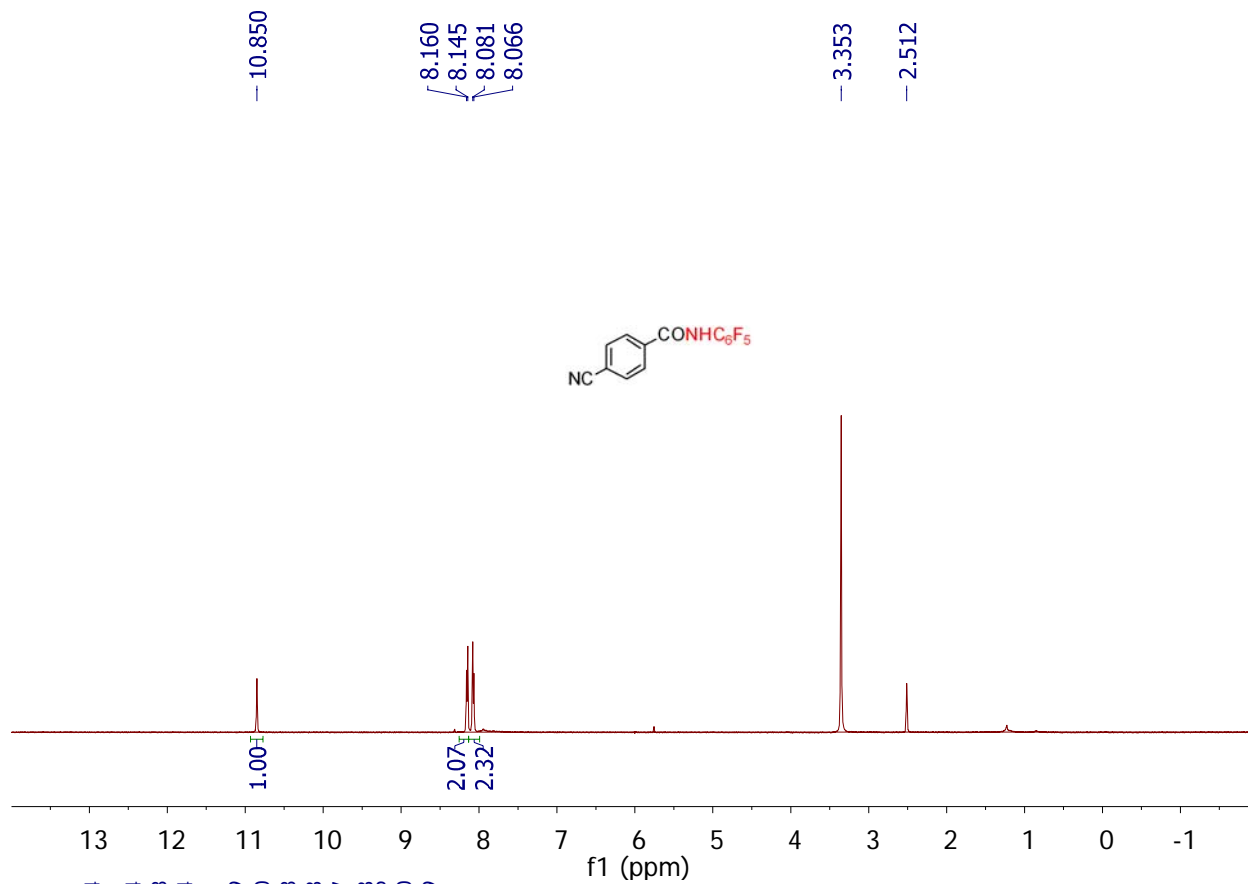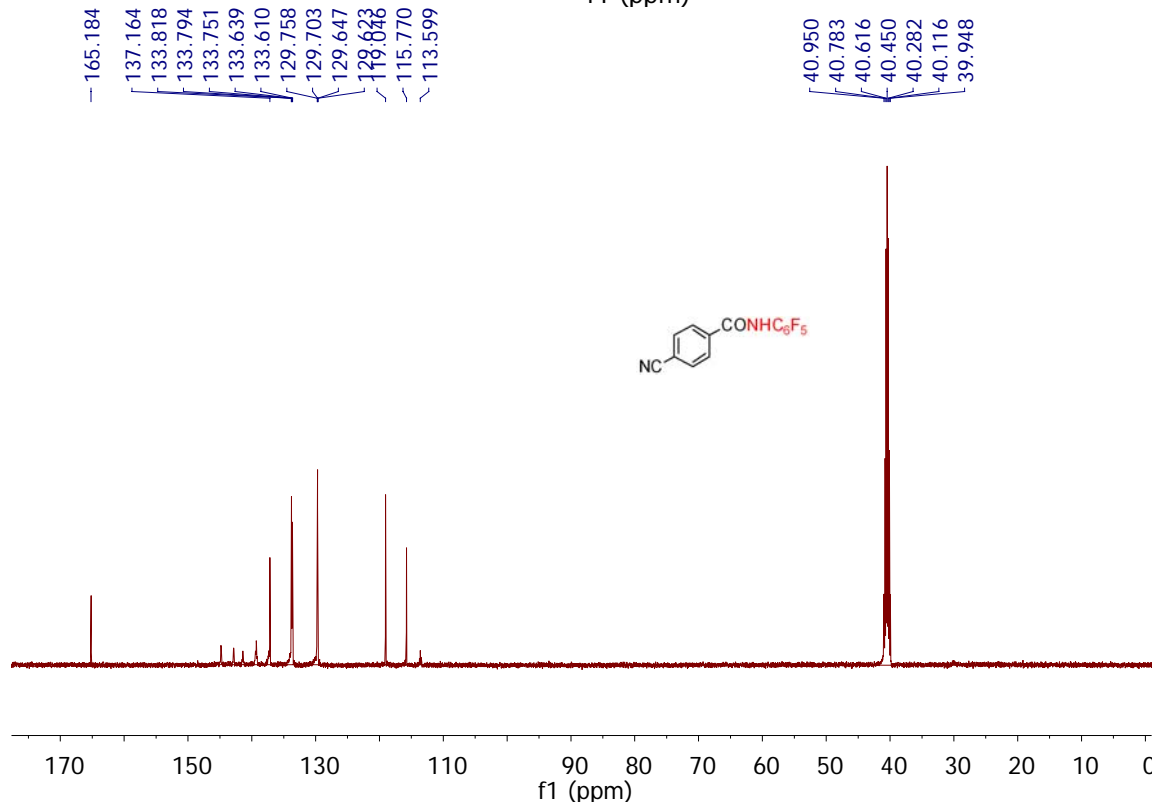

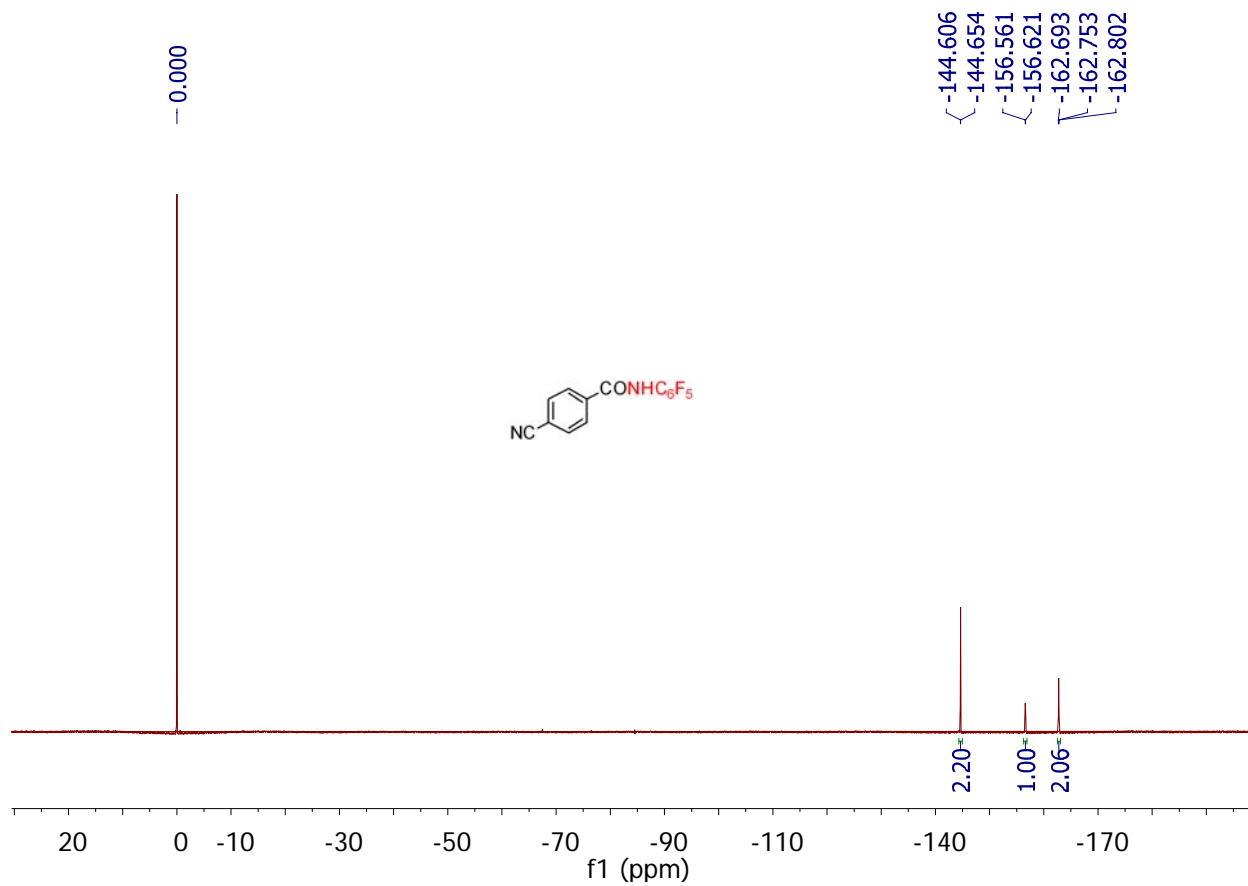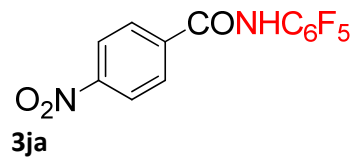

**NMR of compound 3ja**

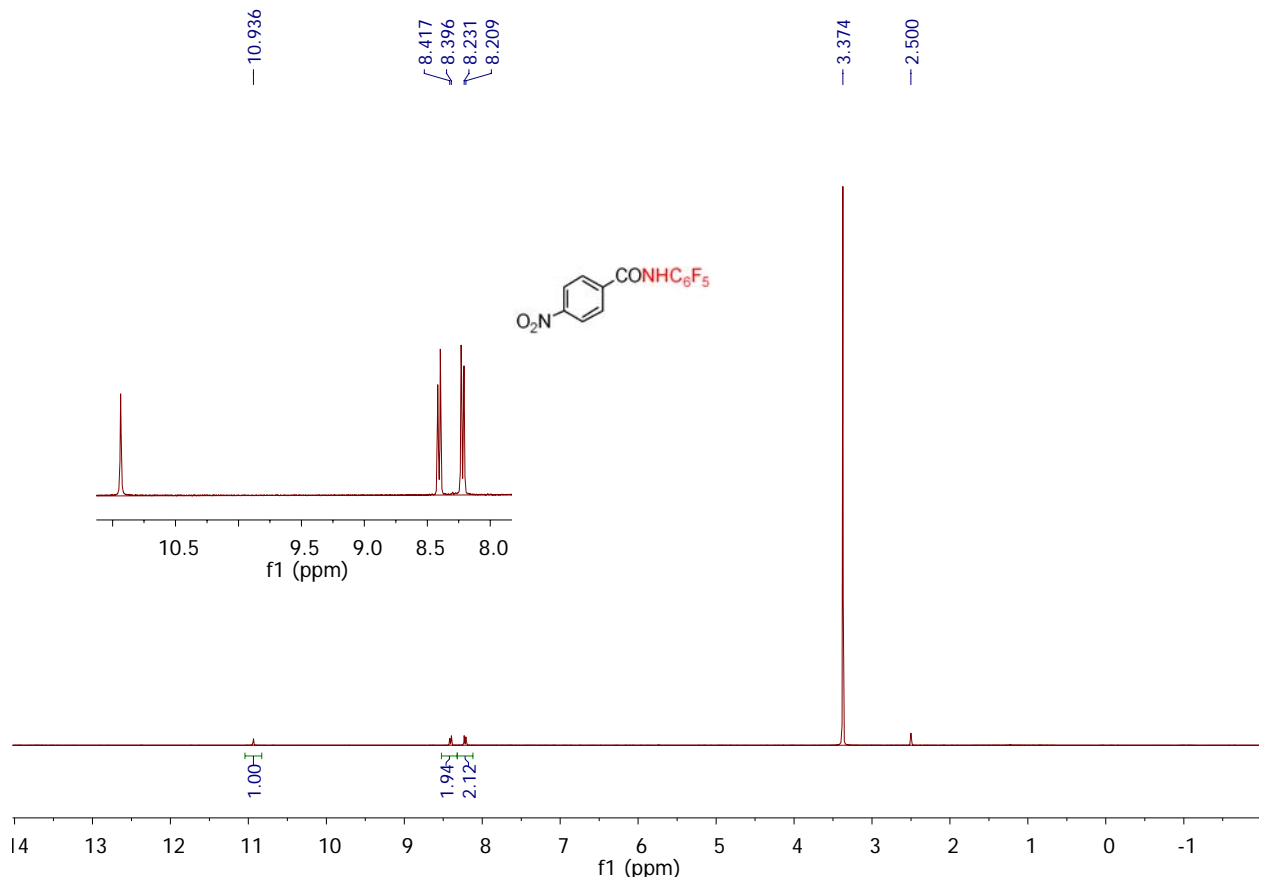



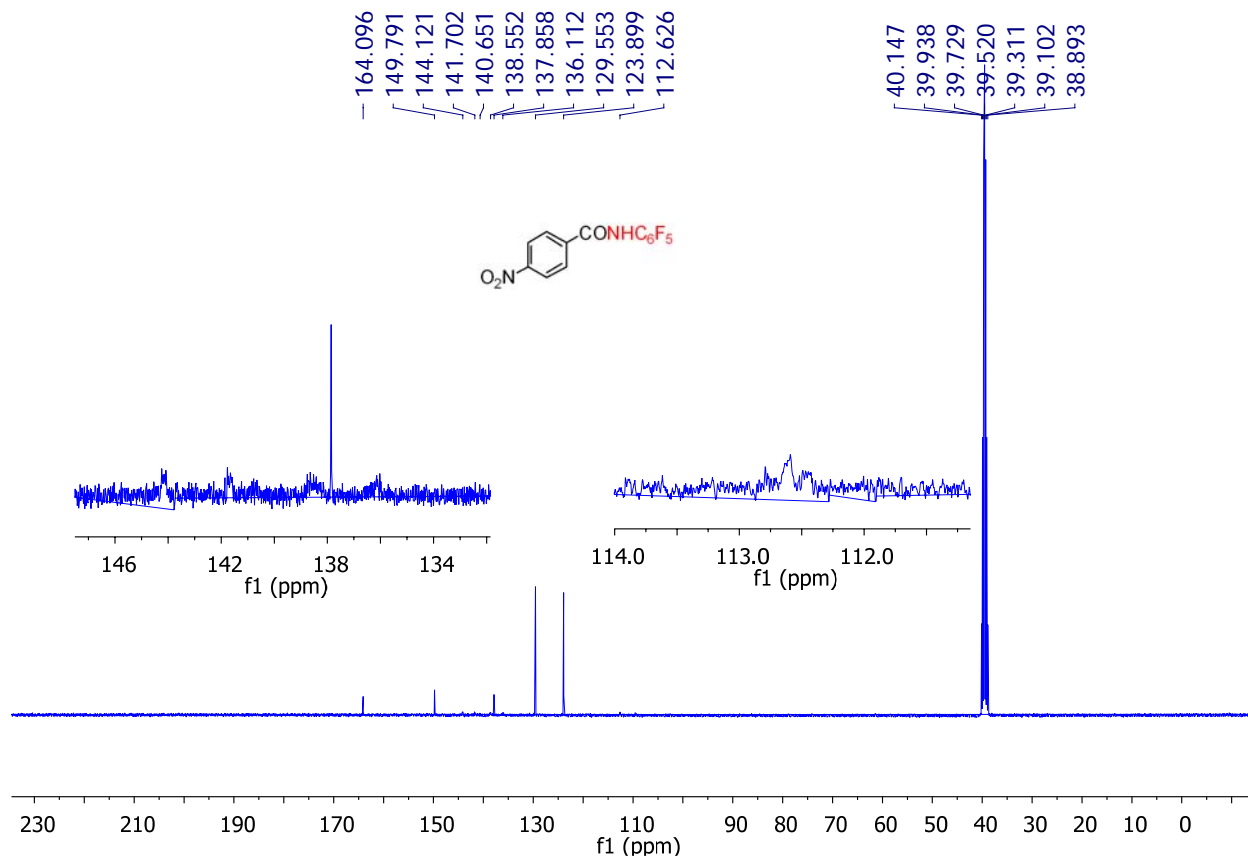

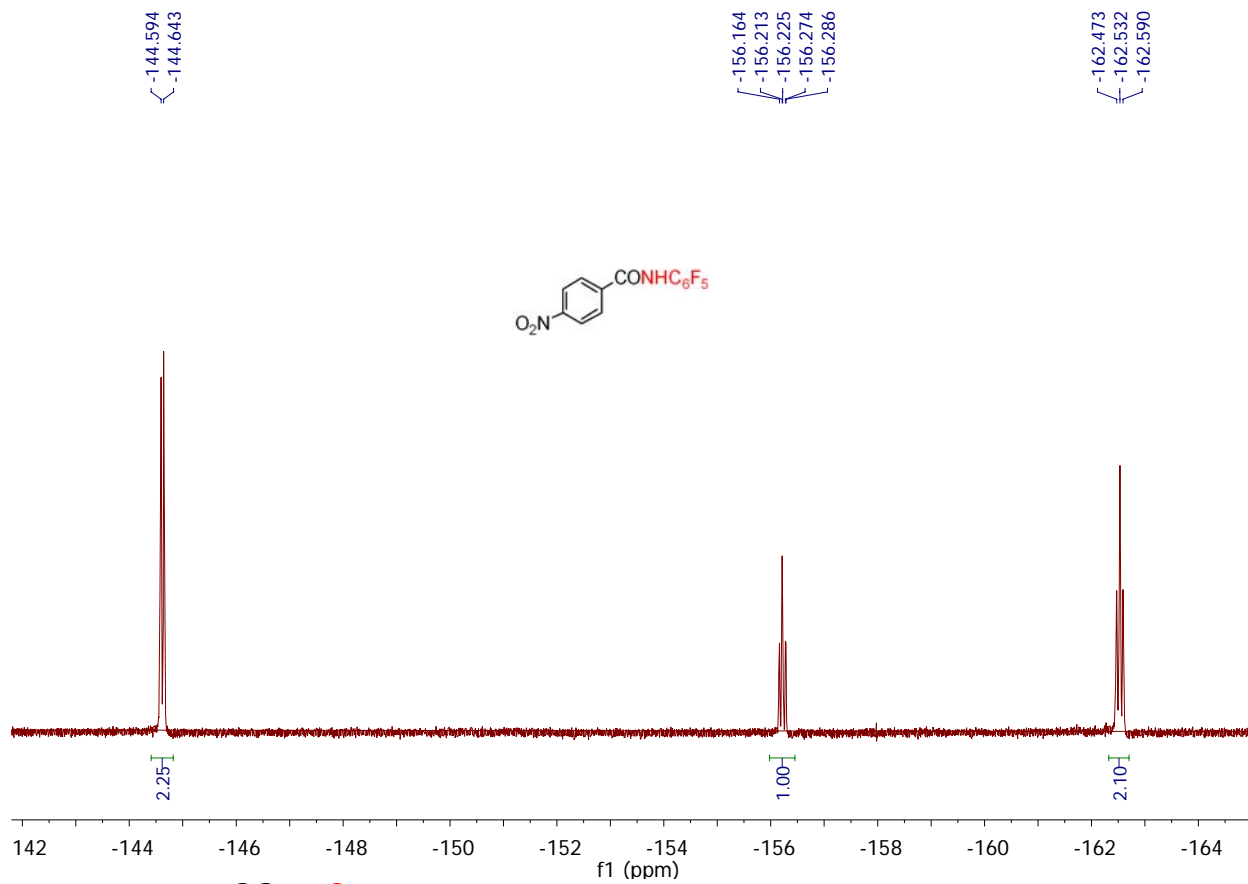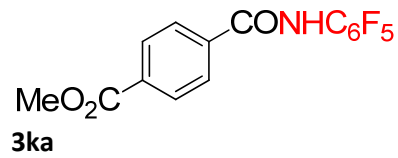

NMR of compound 3ka

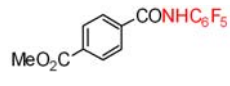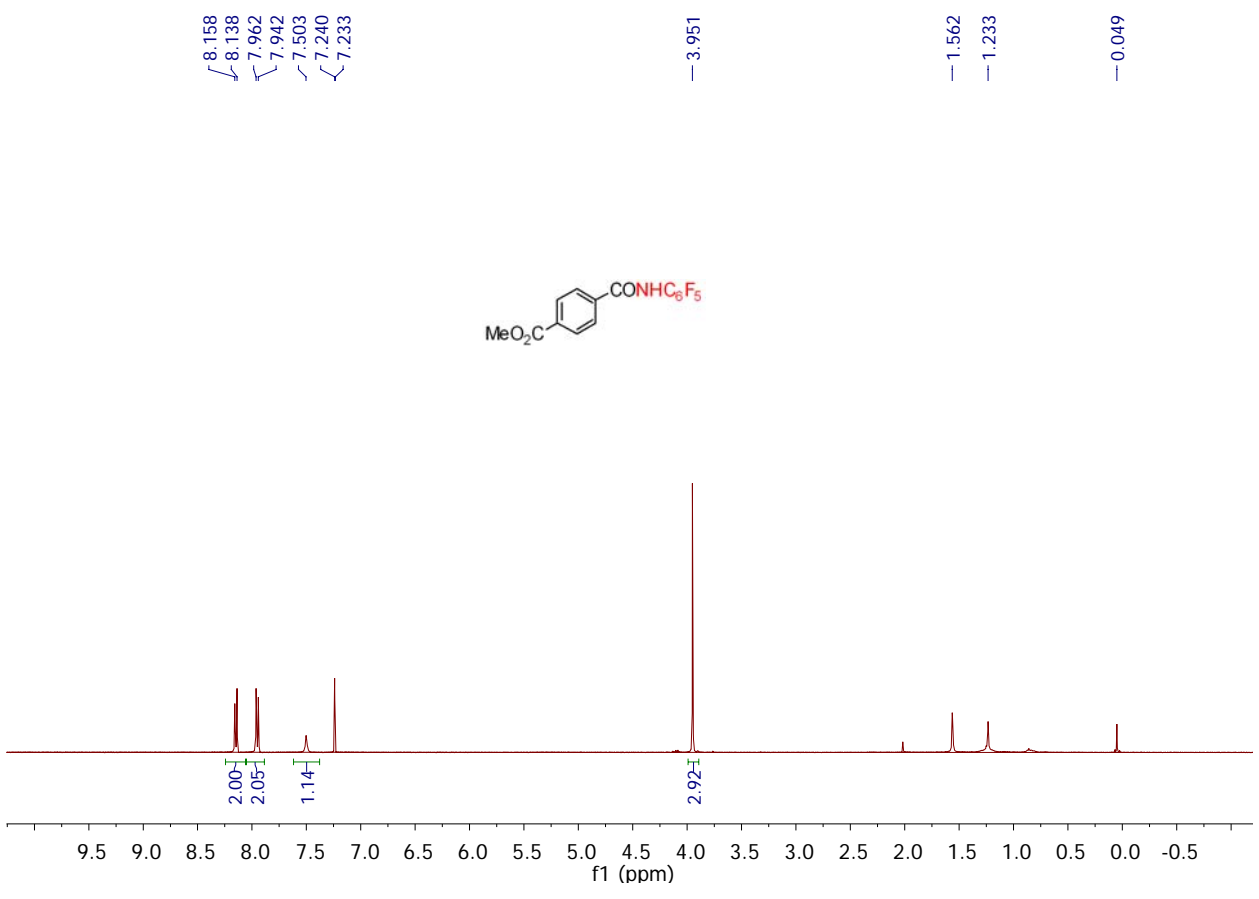

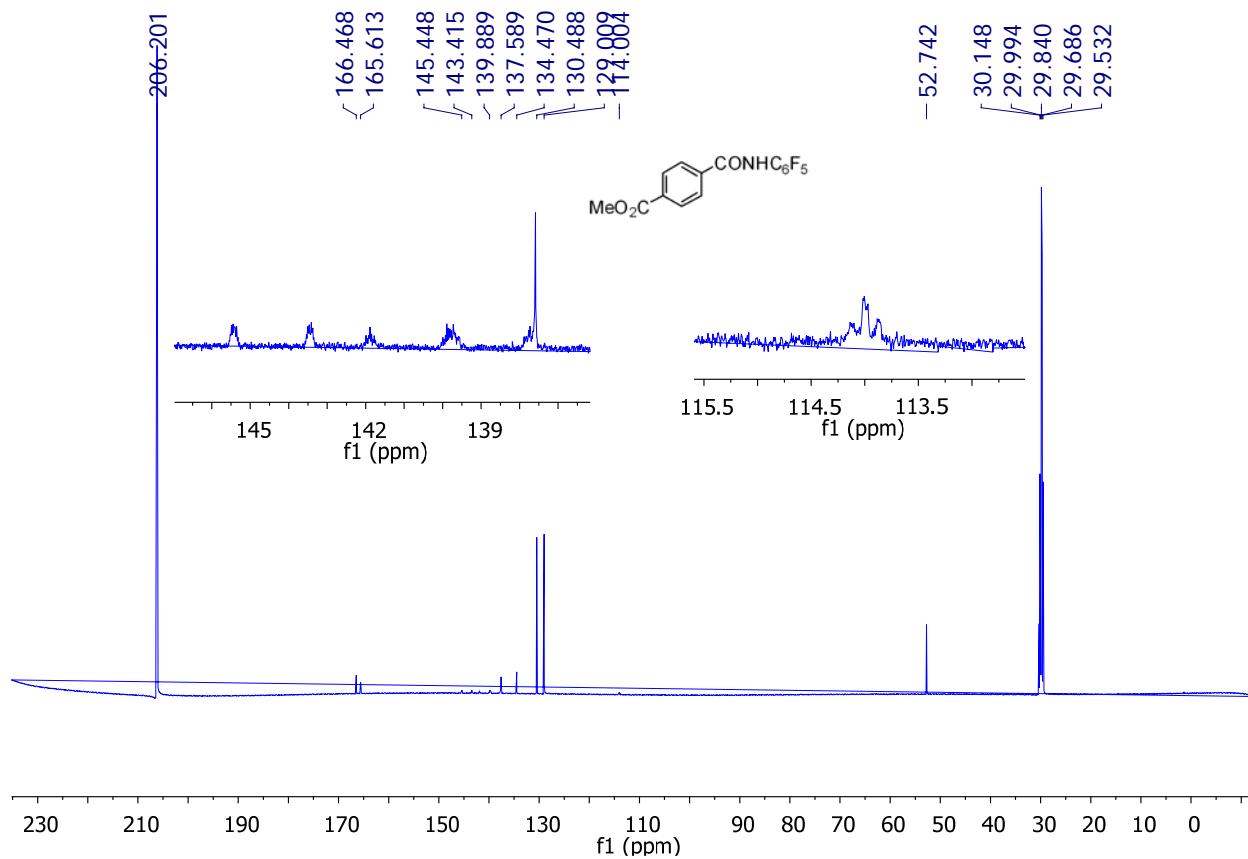

-144.990  
-144.997  
-145.009  
-145.018  
-145.061  
-145.070  
-145.082  
-145.089

-156.257  
-156.314  
-156.372

-162.294  
-162.306  
-162.315  
-162.358  
-162.372  
-162.415  
-162.424  
-162.436  
-162.443

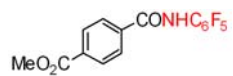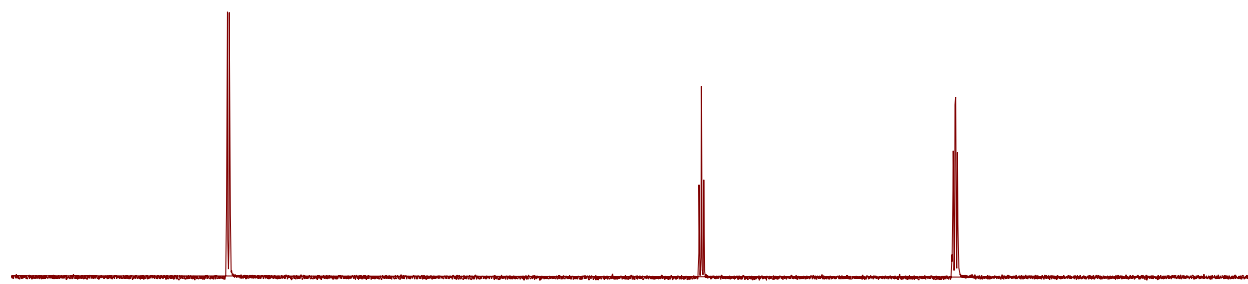

140 -143 -146 -149 -152 -155 -158 -161 -164 -167  
f1 (ppm)

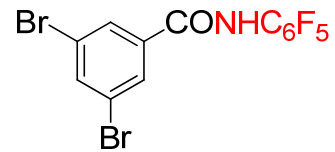

3la

NMR of compound 3la

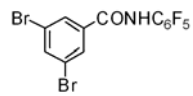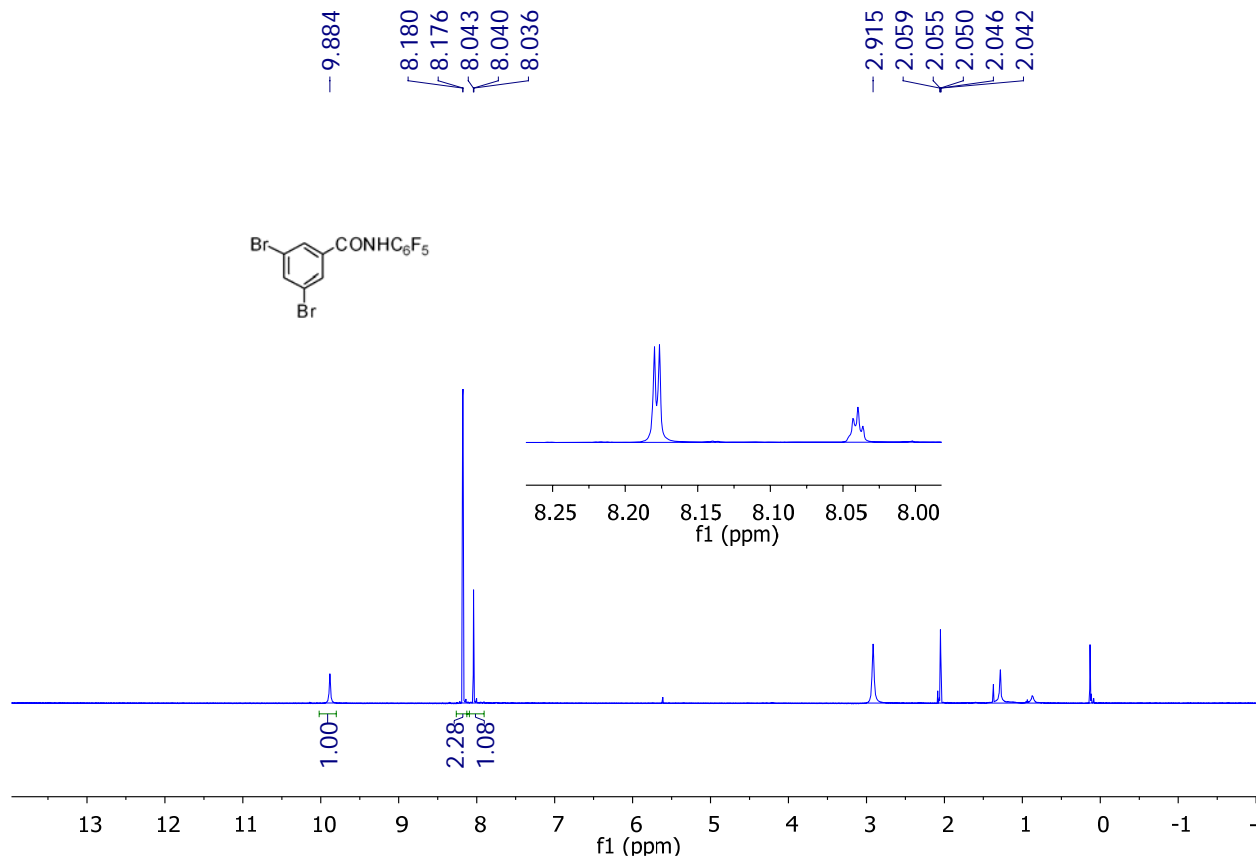

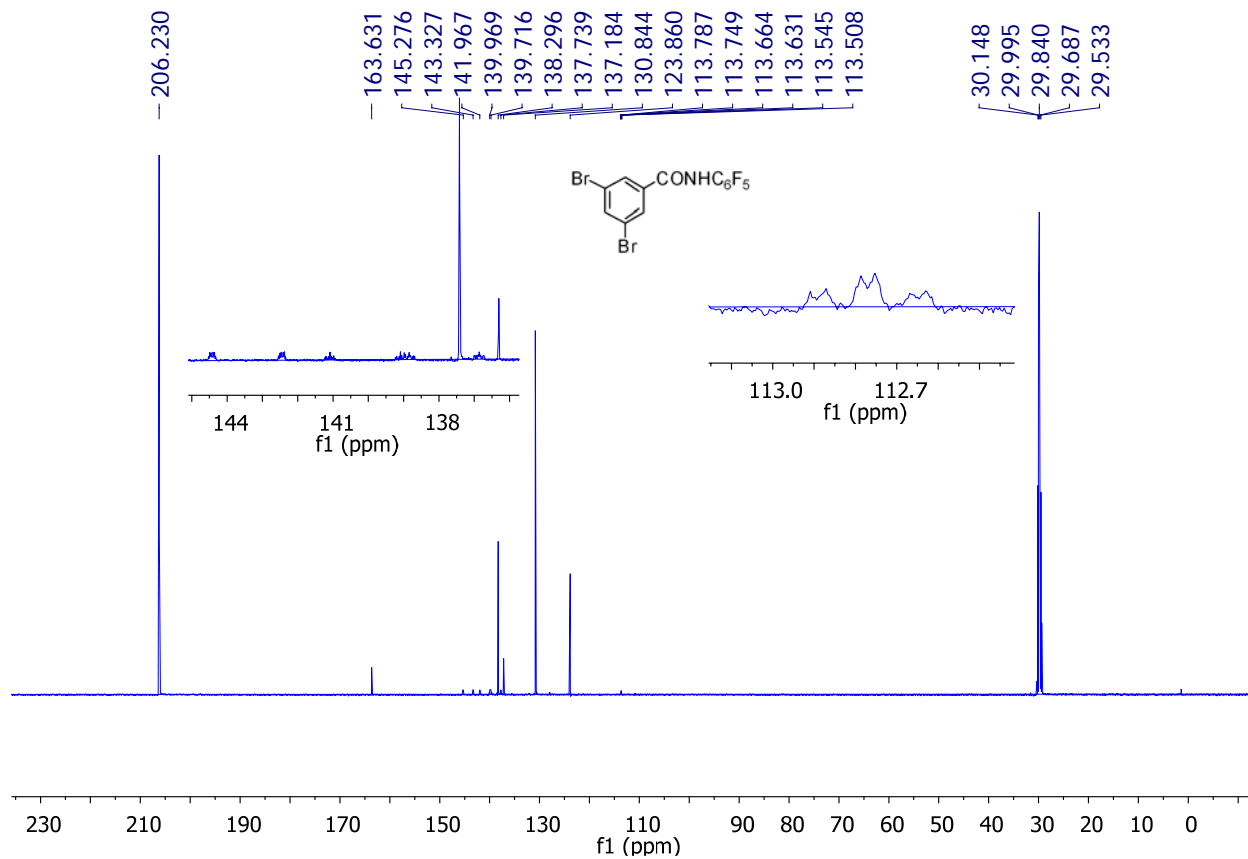

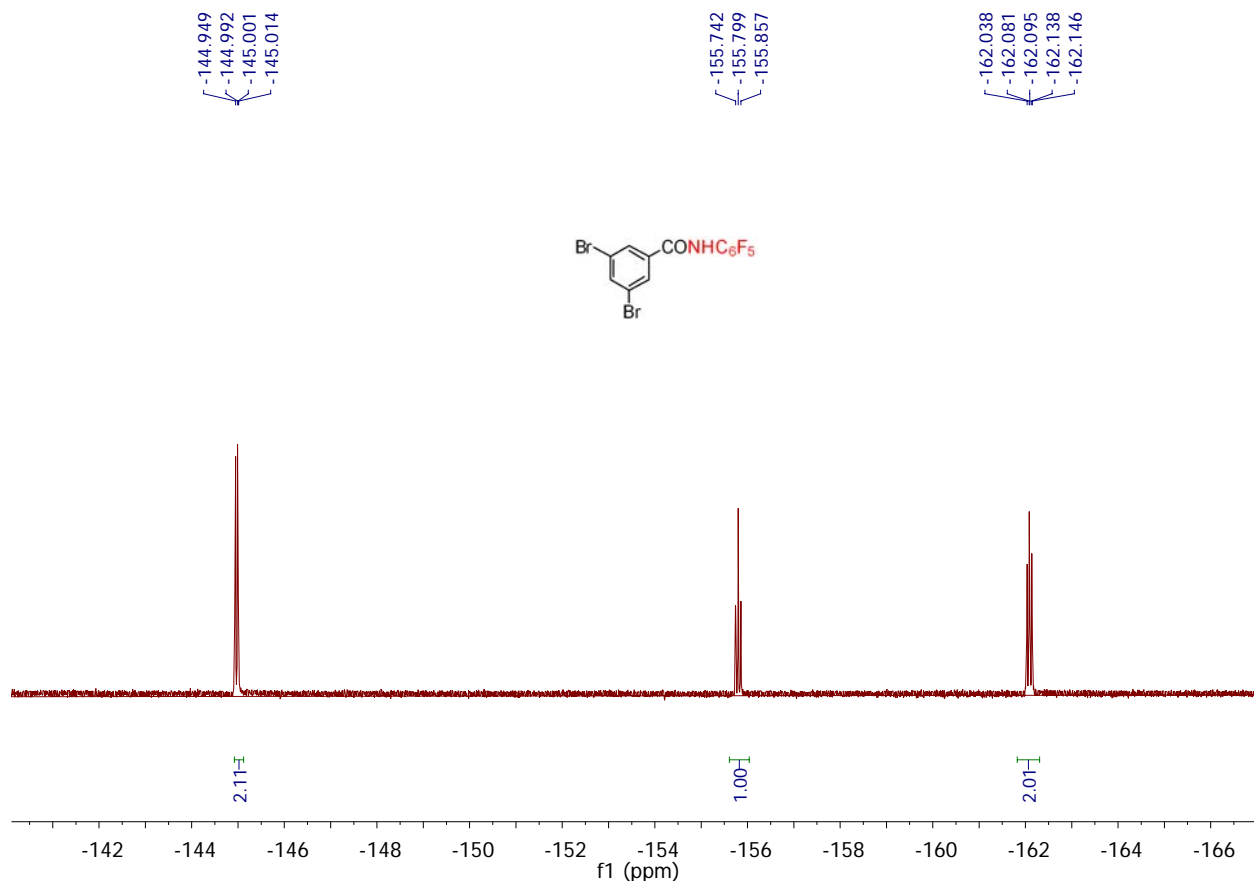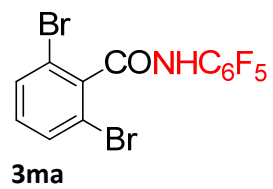

**NMR of compound 3ma**



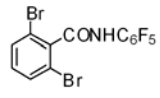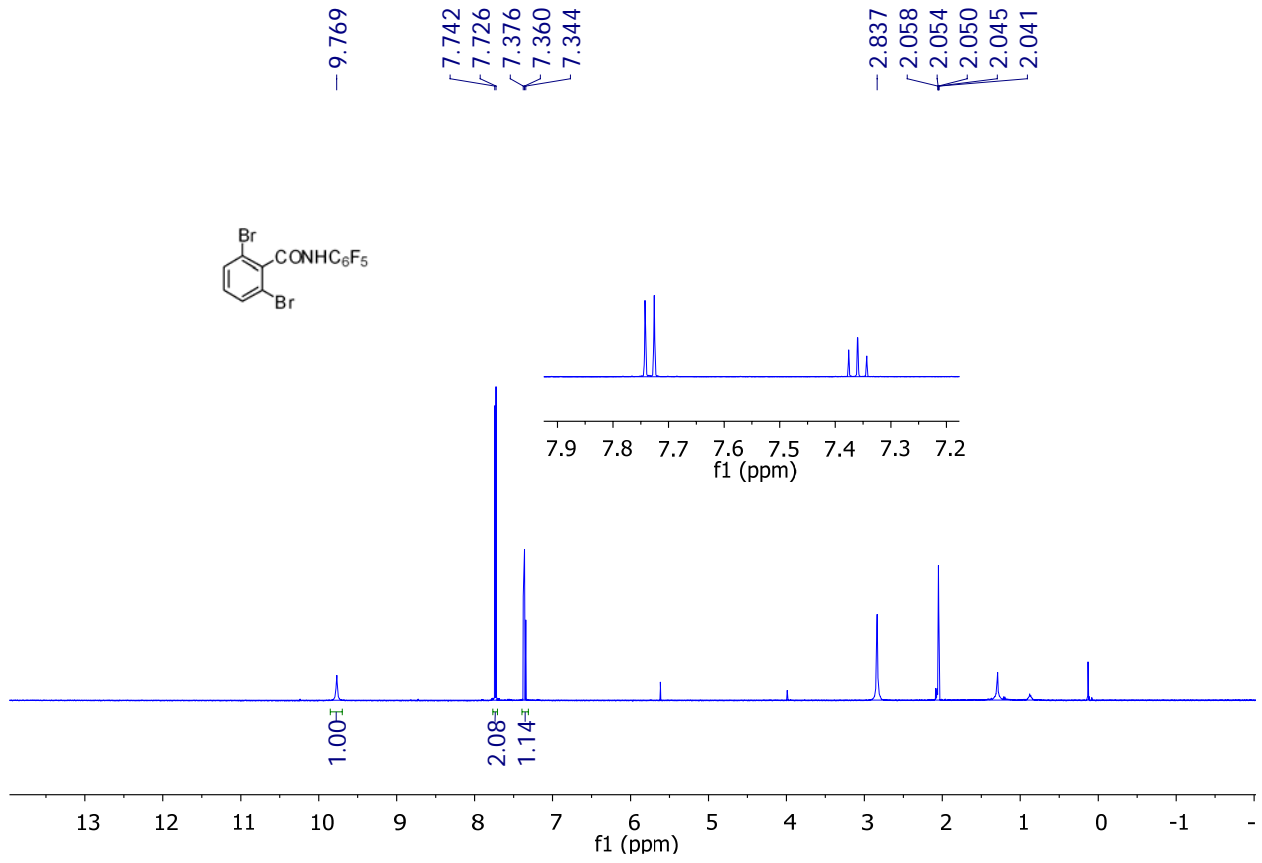

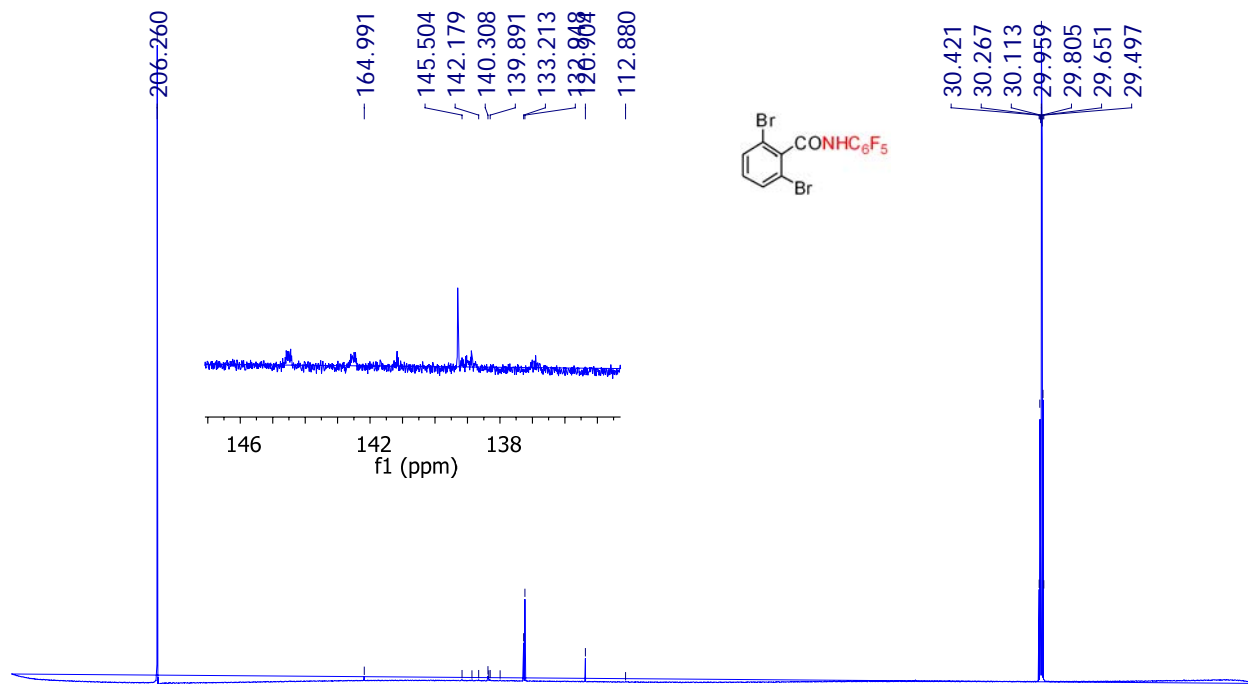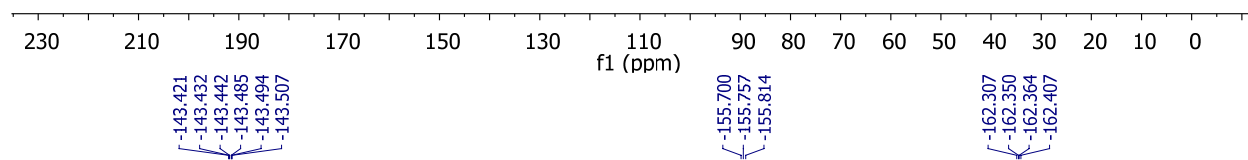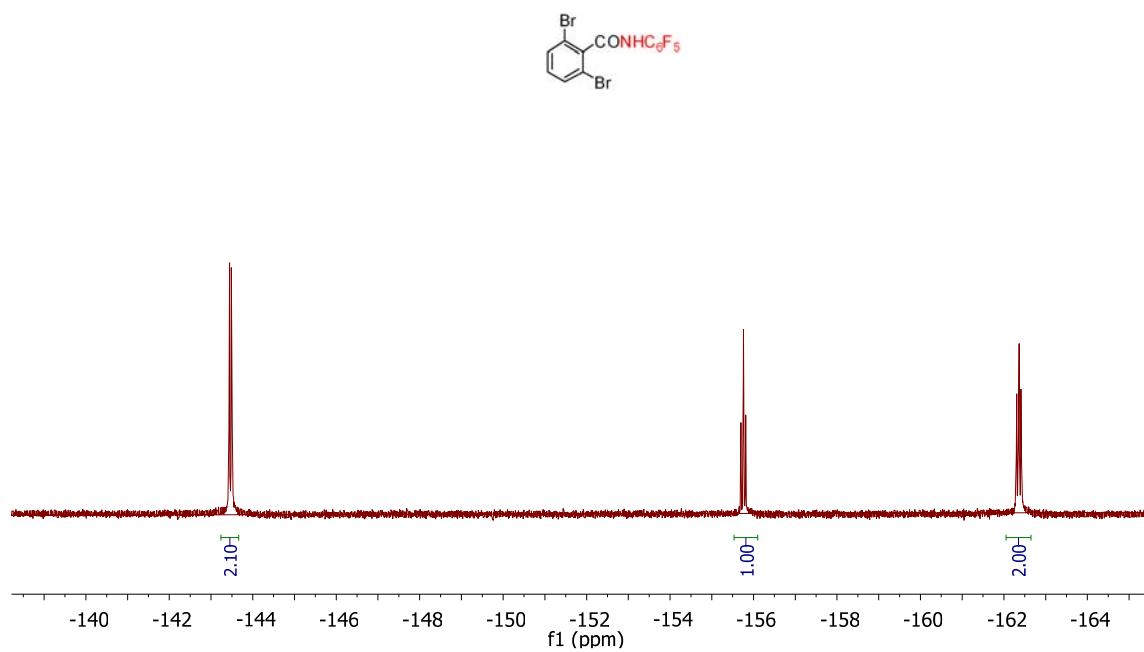

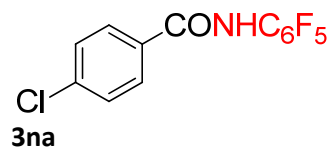

### NMR of compound 3na

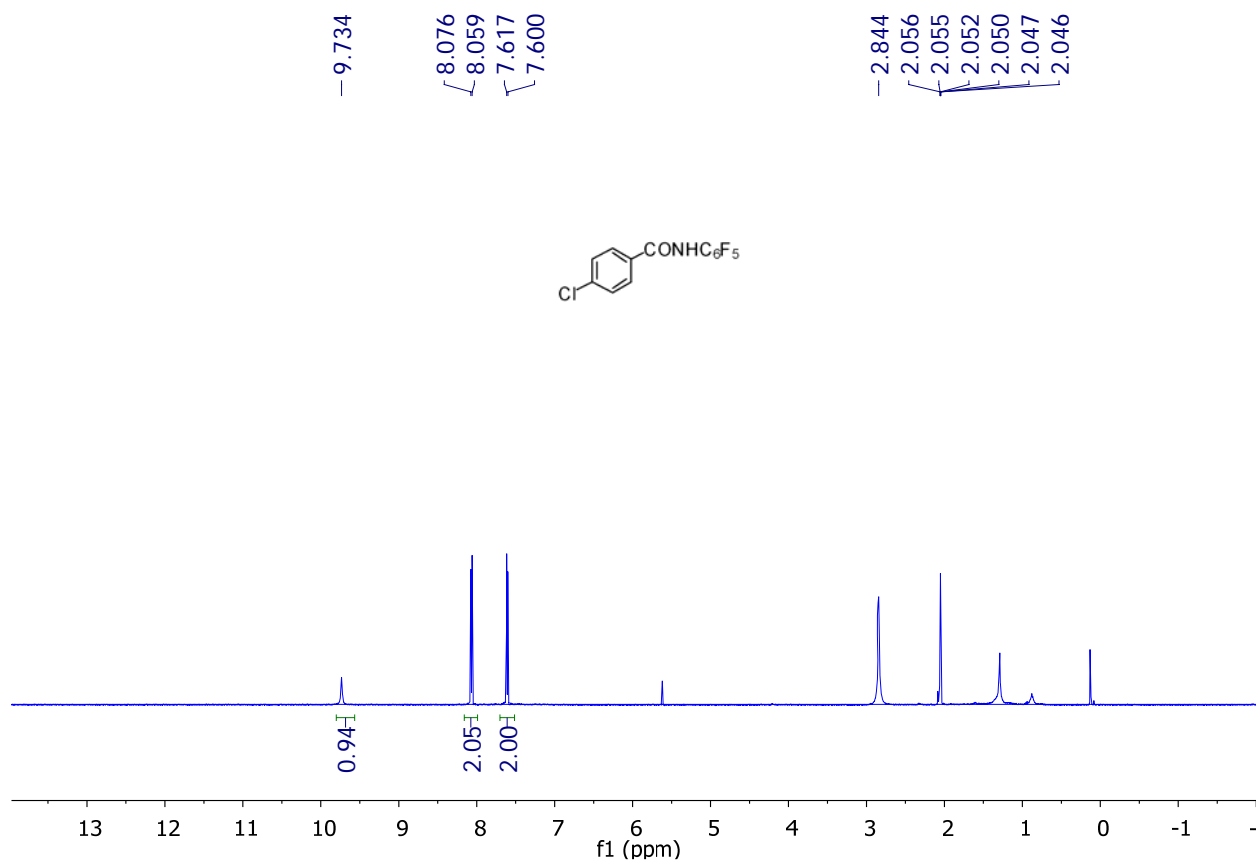

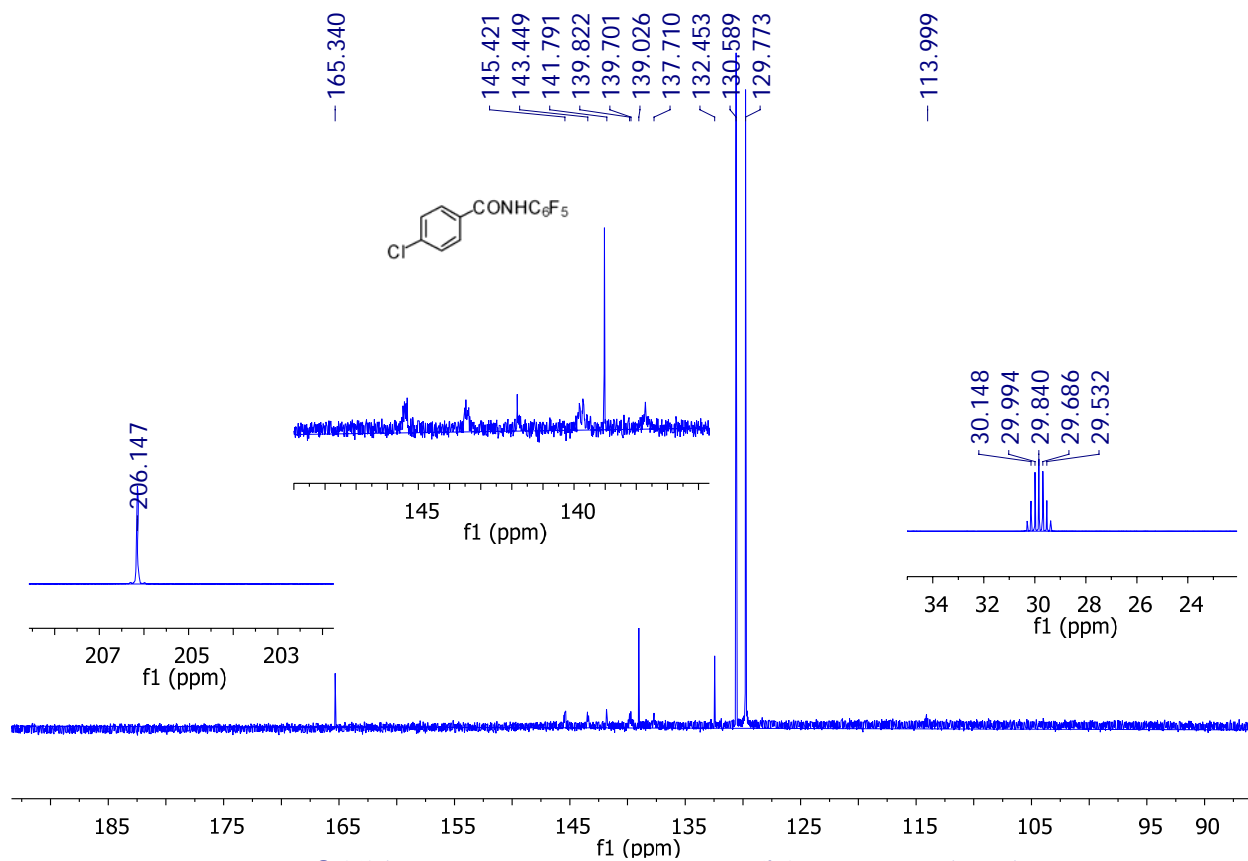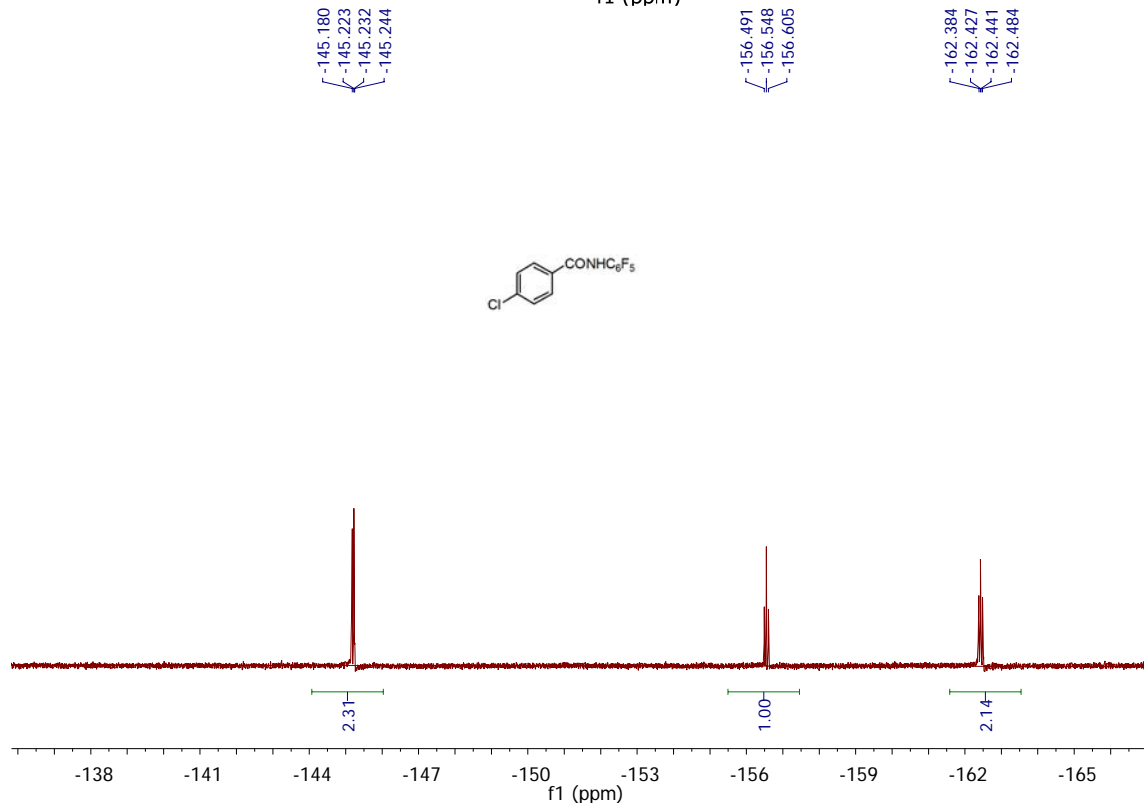

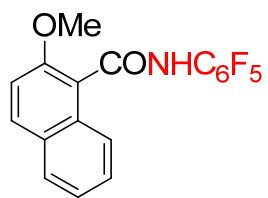

30a

### NMR of compound 30a

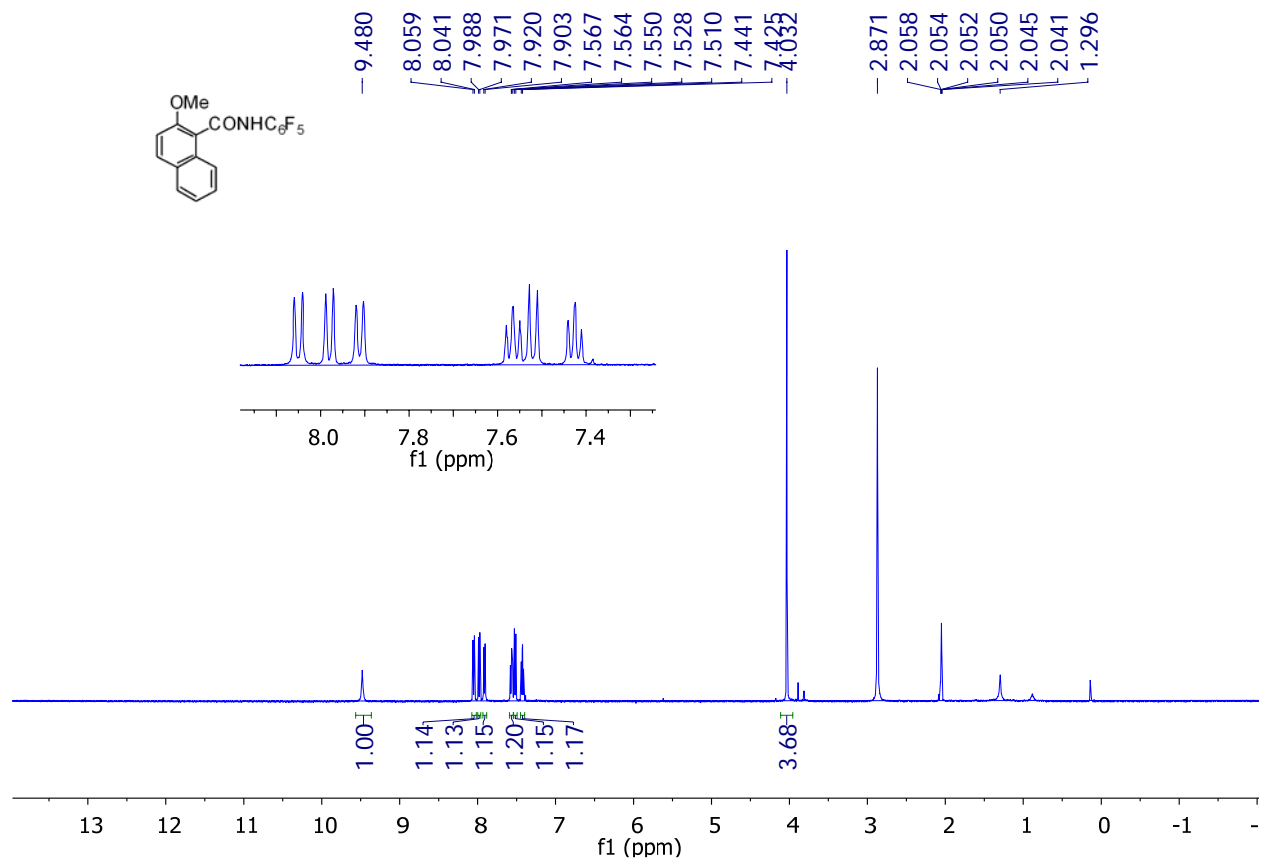

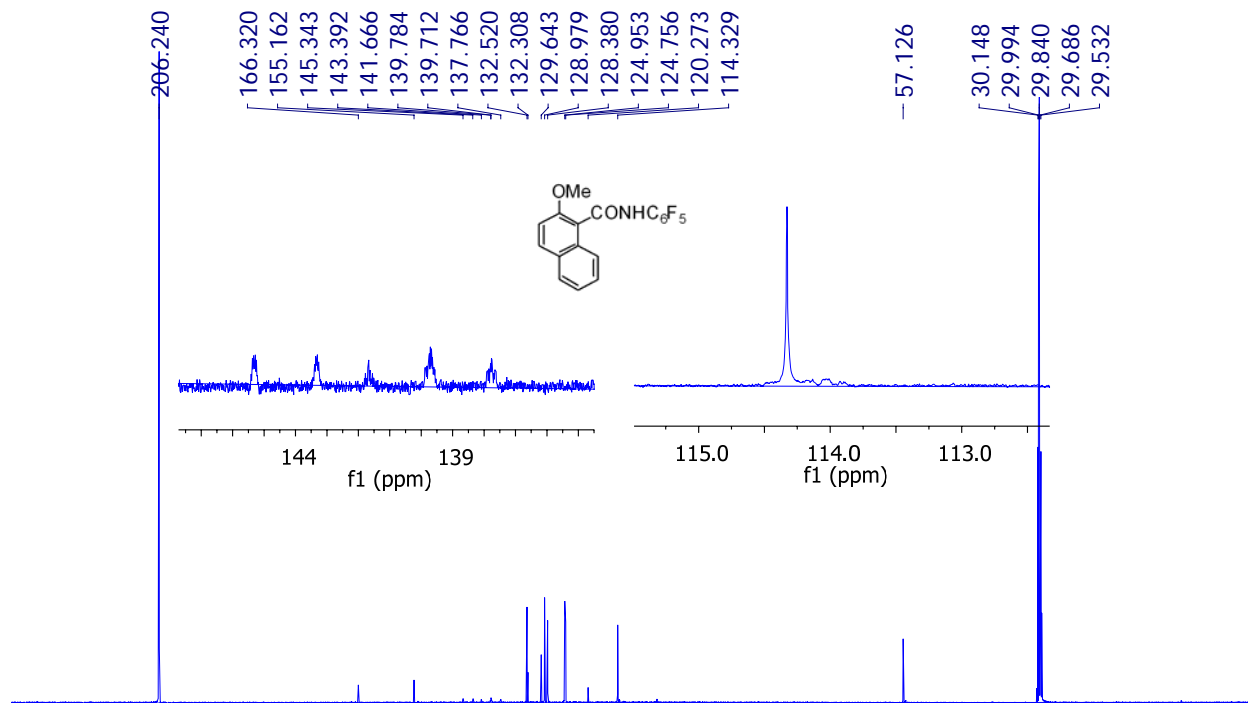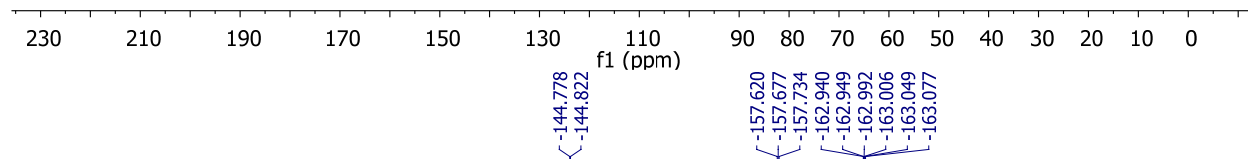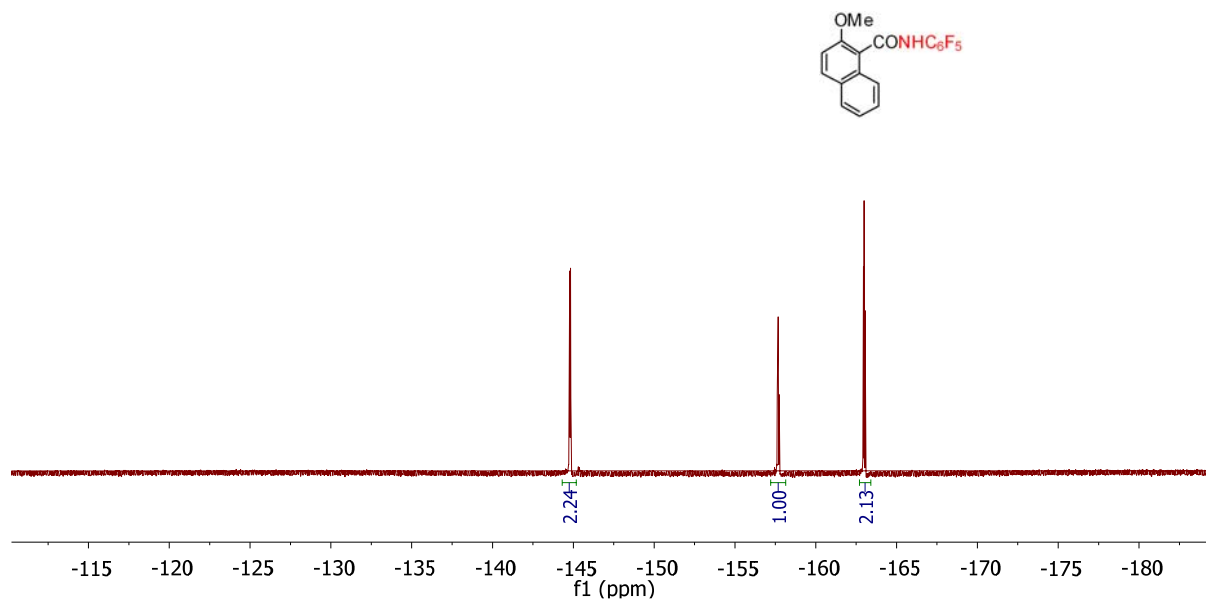

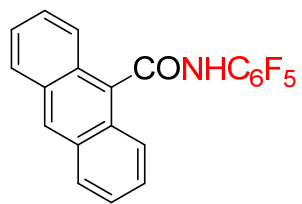

3pa

NMR of compound 3pa

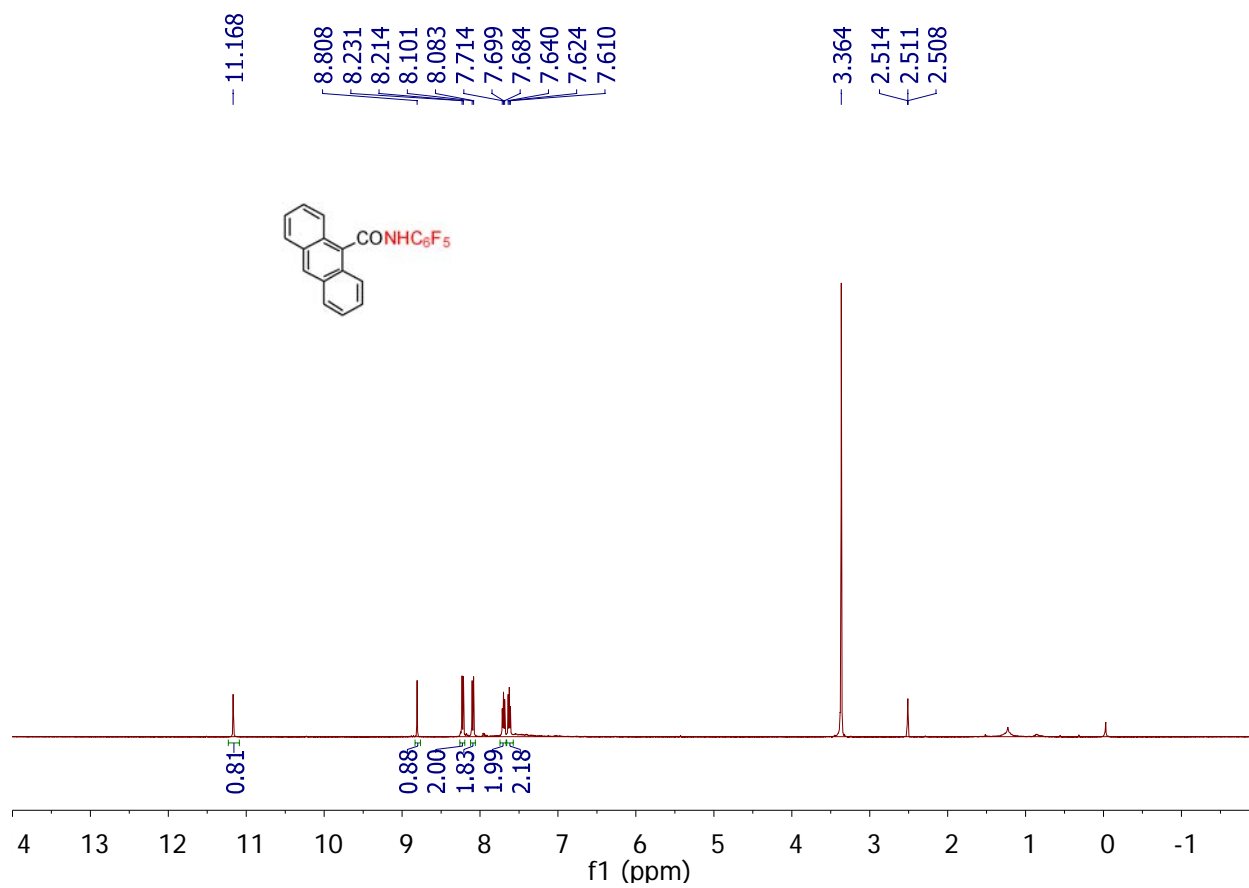

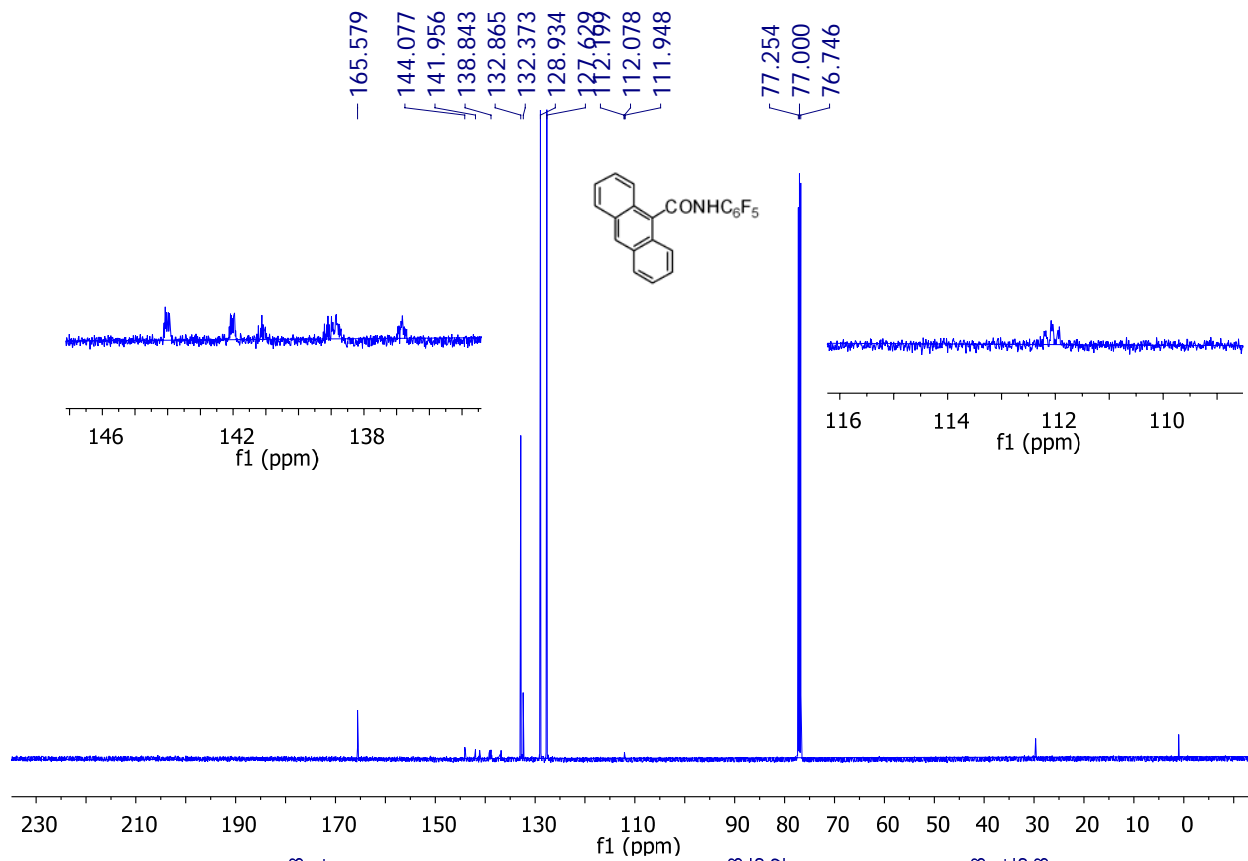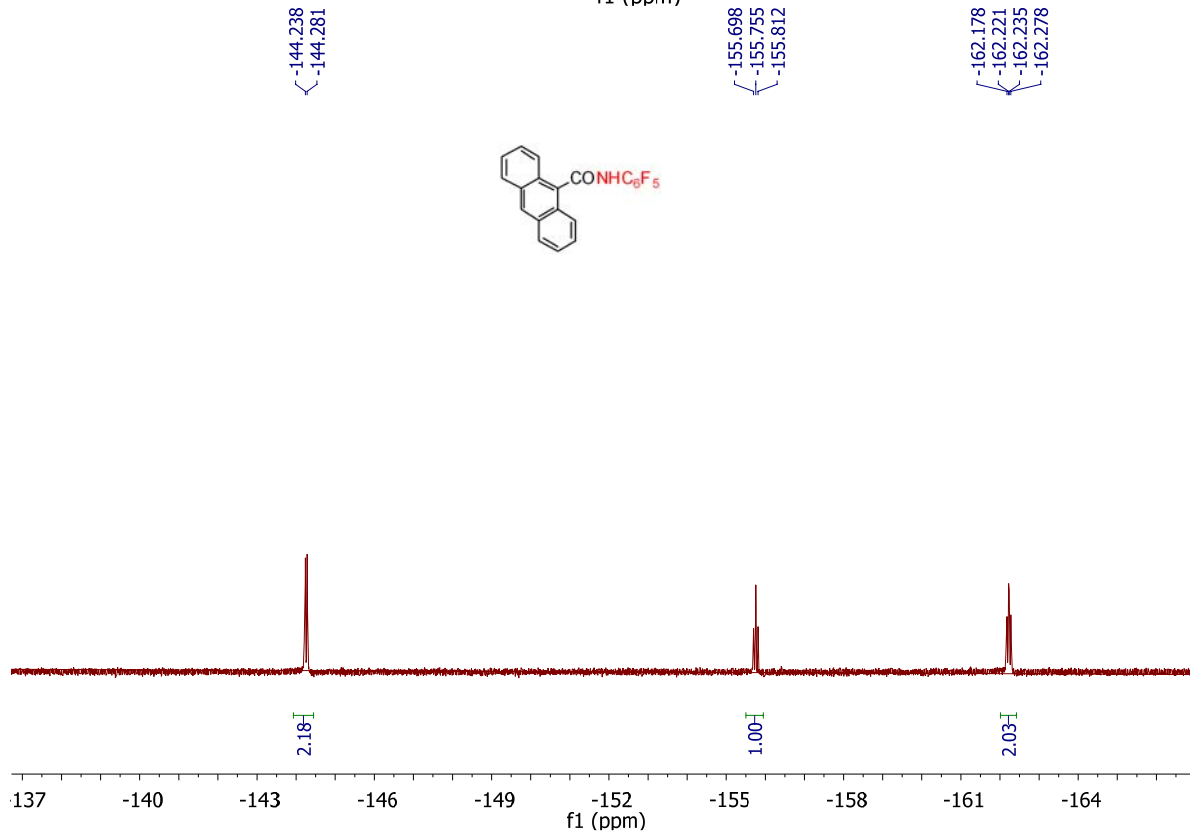



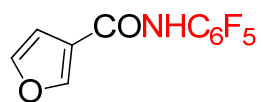

3qa

### NMR of compound 3qa

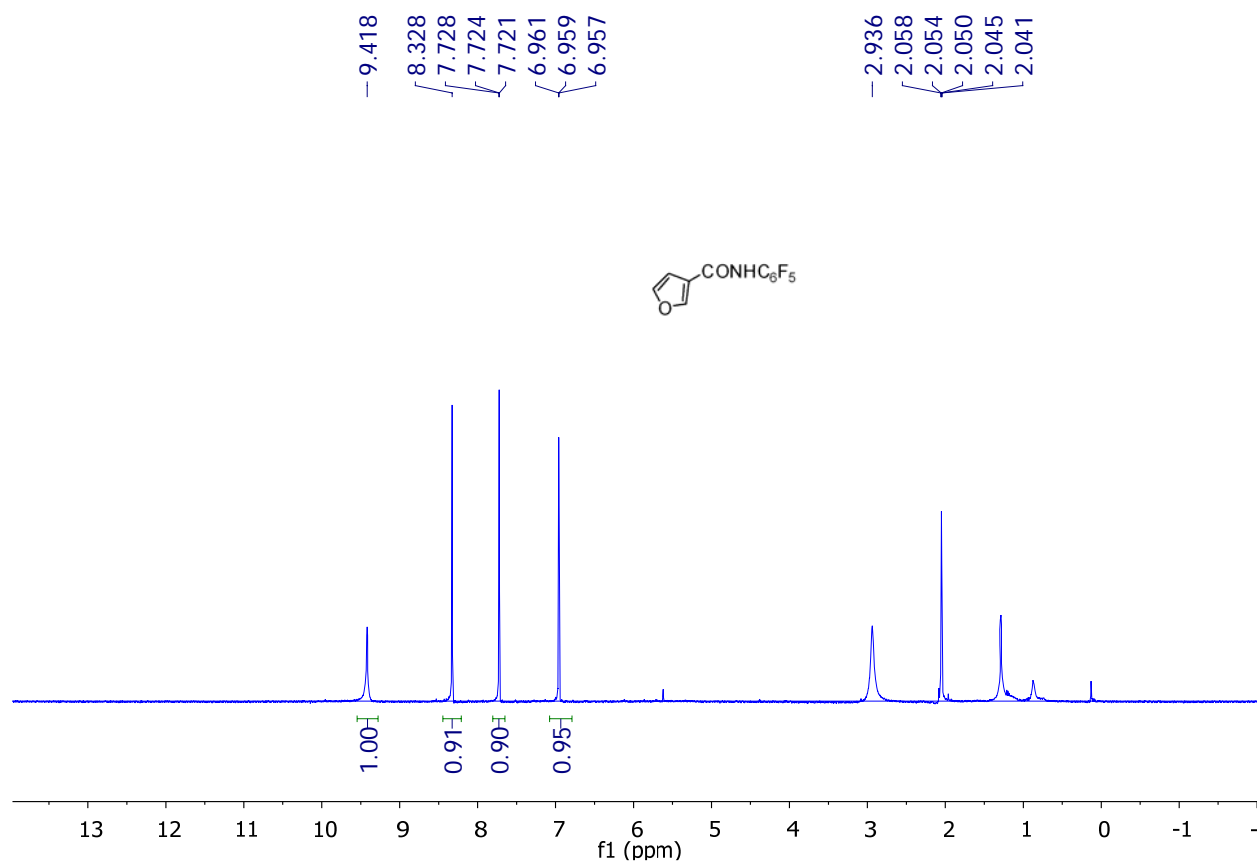

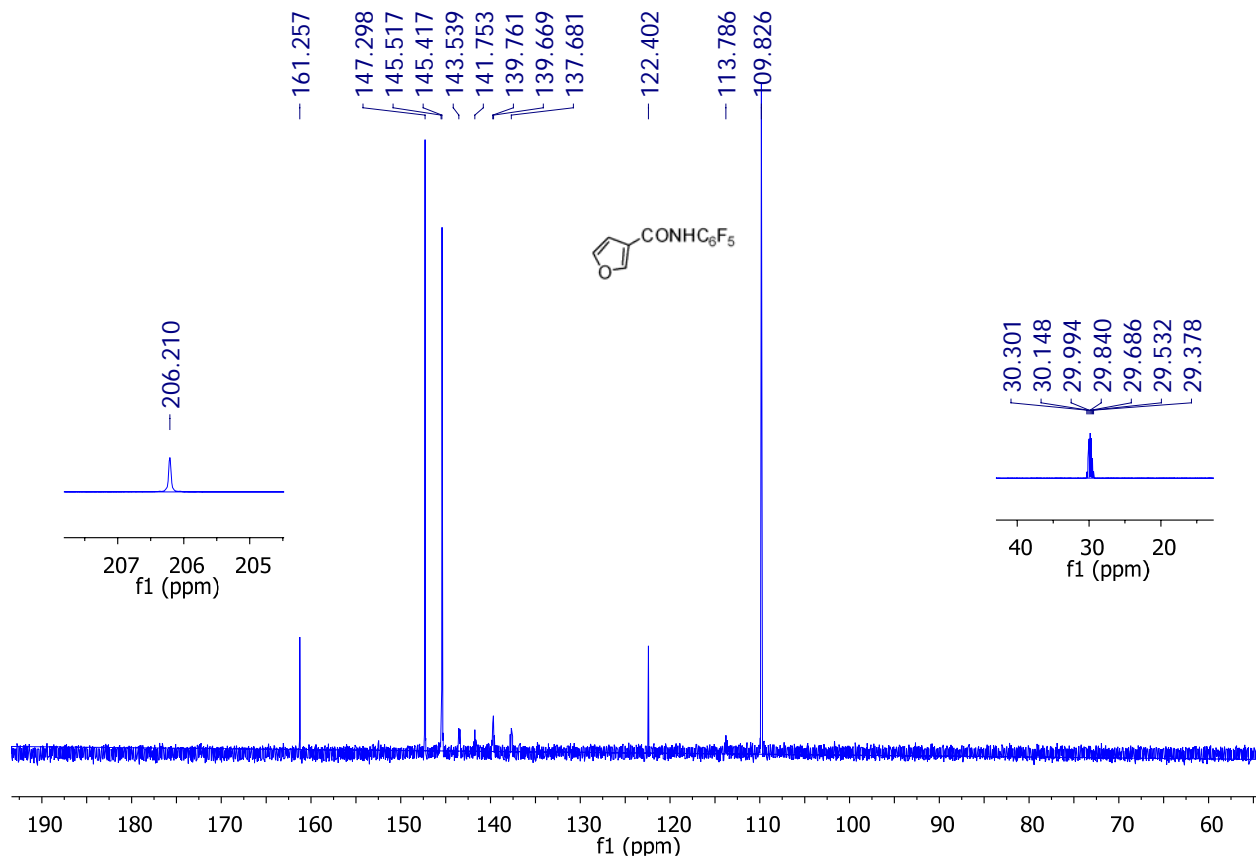

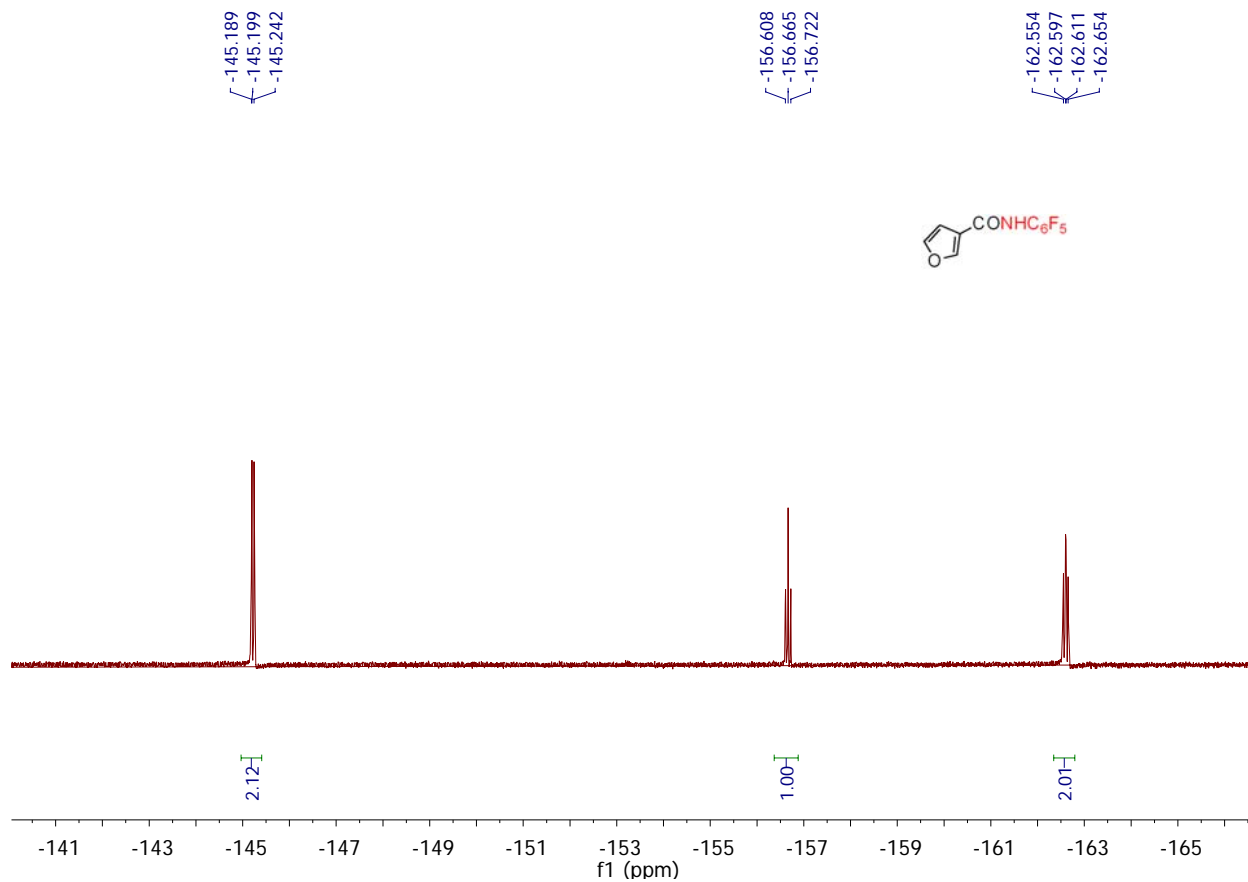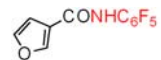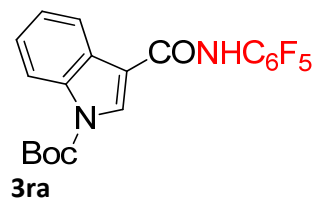

NMR of compound 3ra

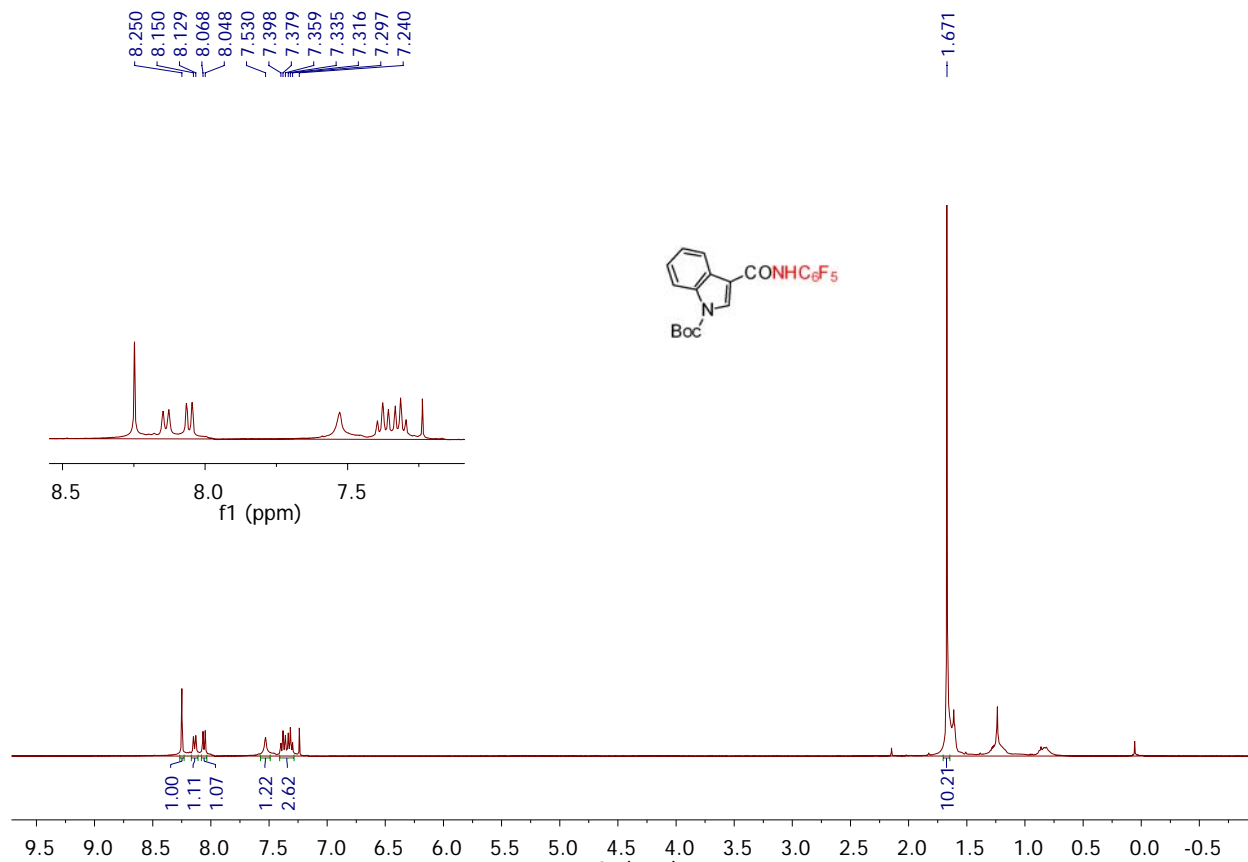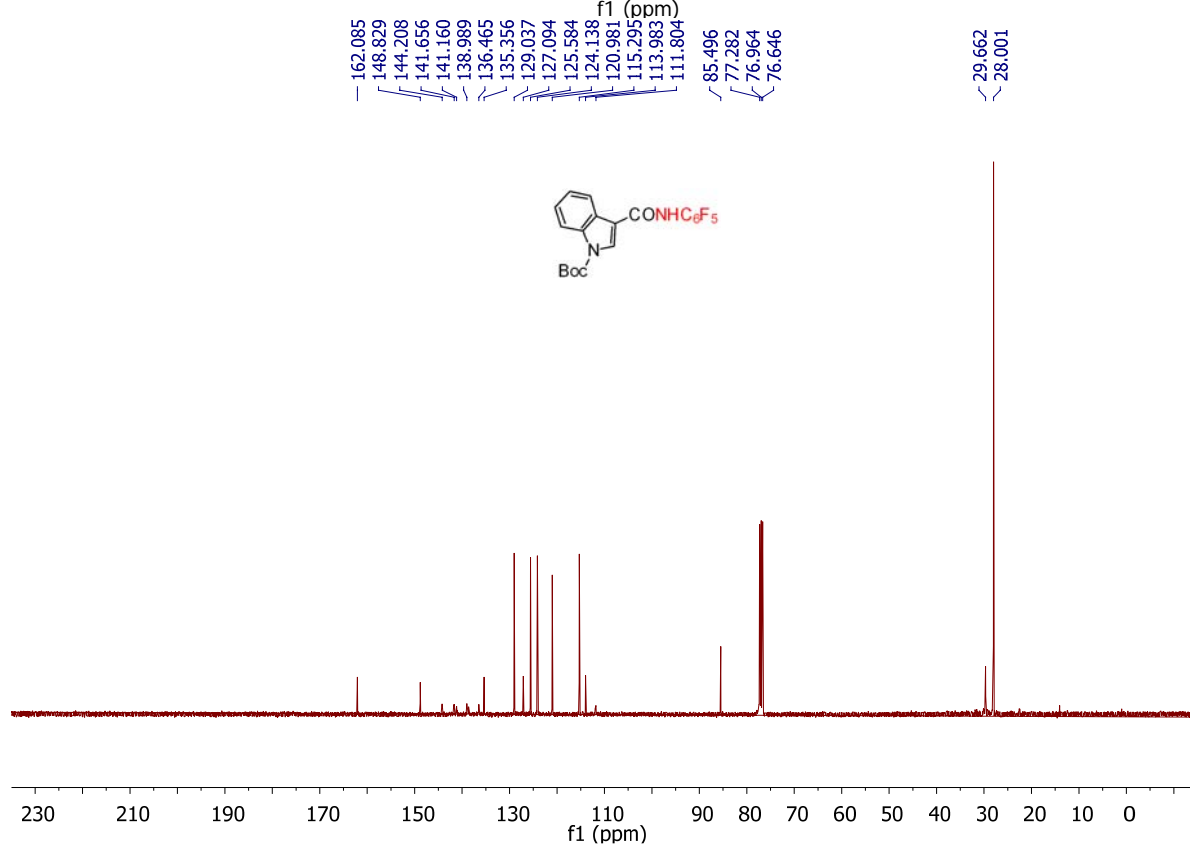

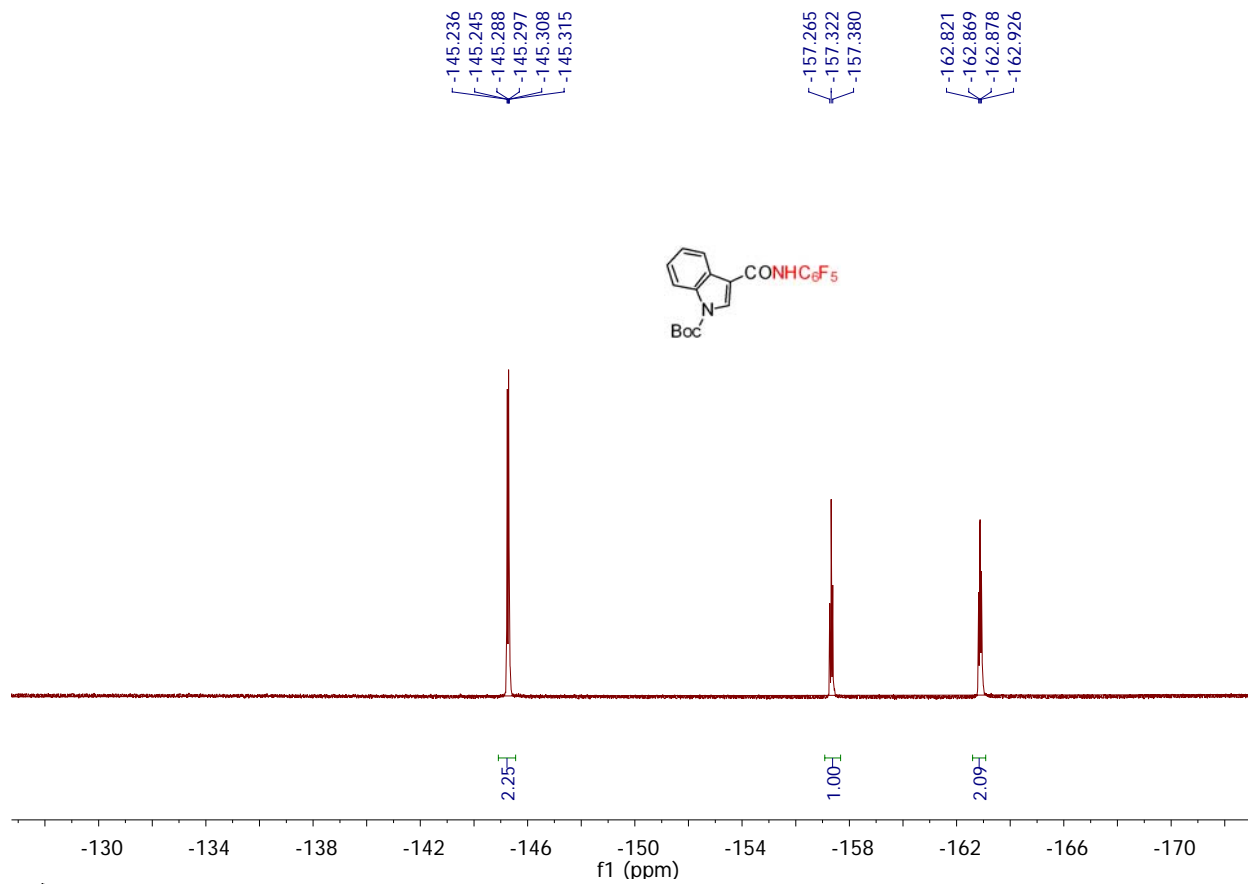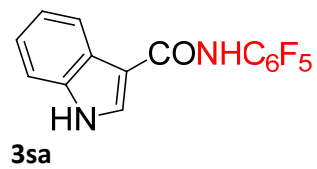

3sa

### NMR of compound 3sa

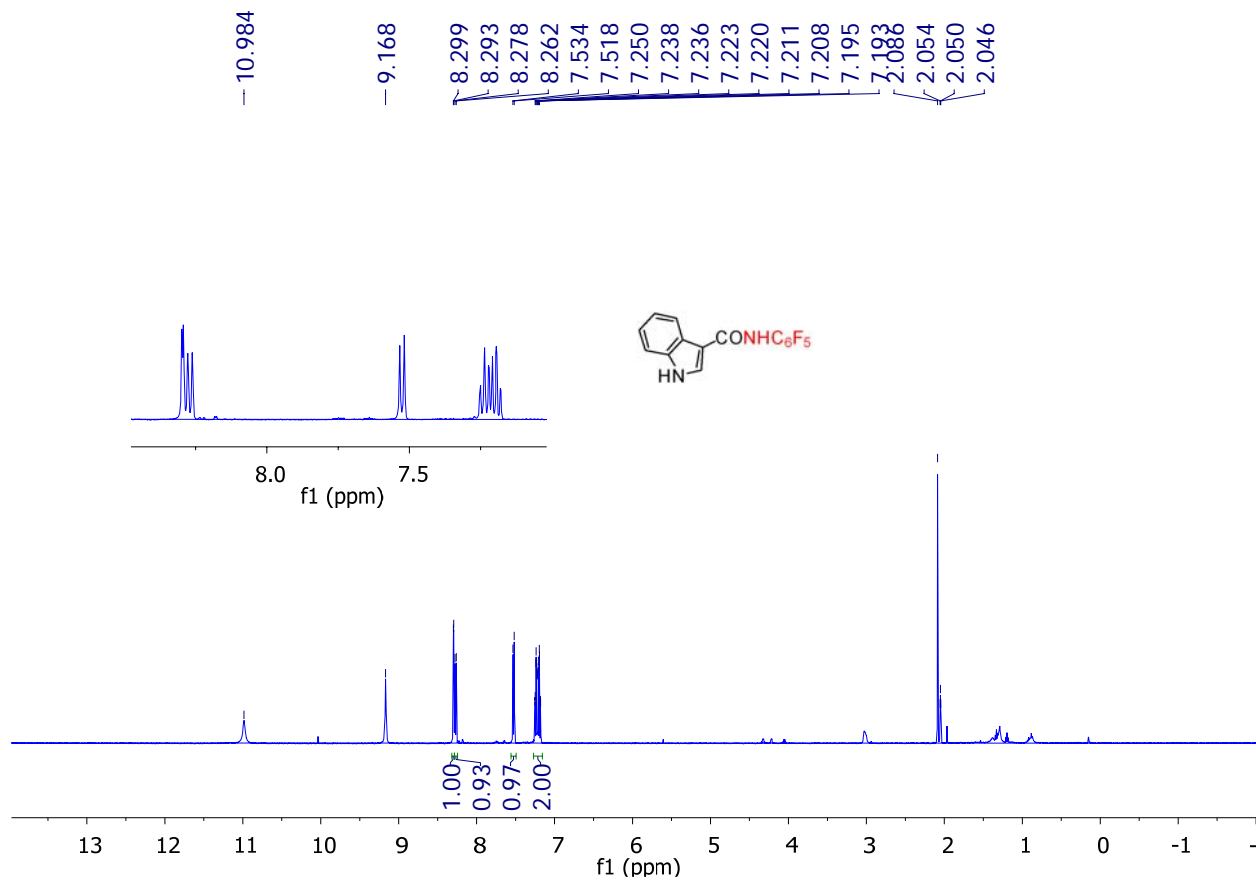

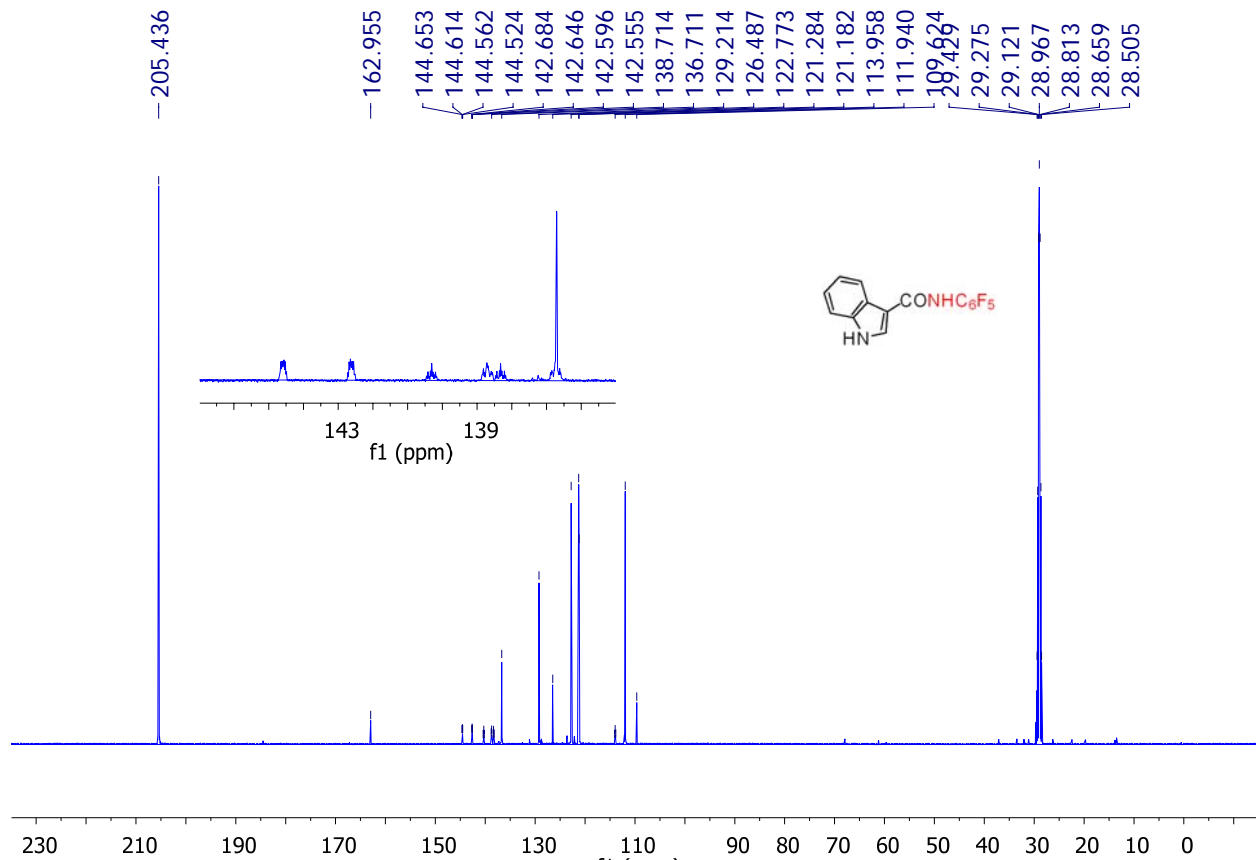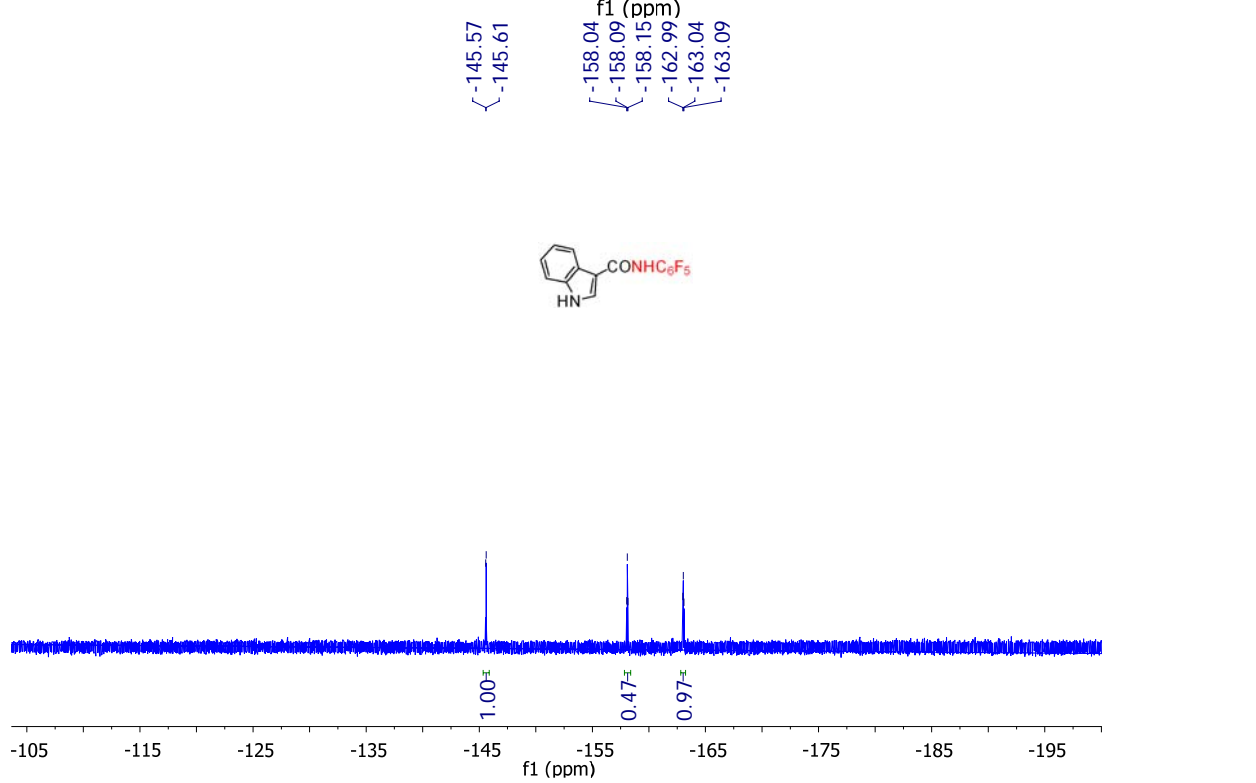

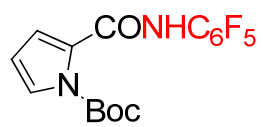

3ta

### NMR of compound 3ta

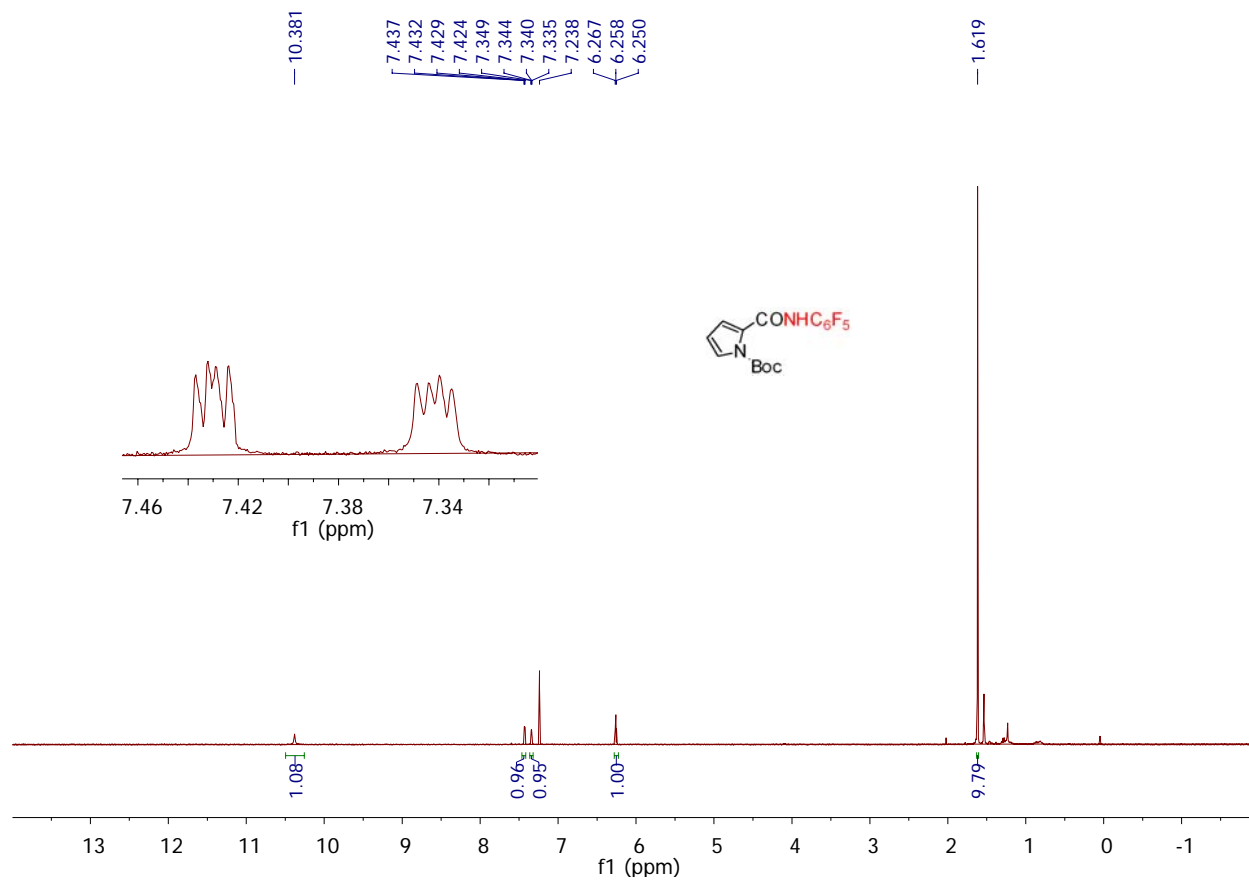



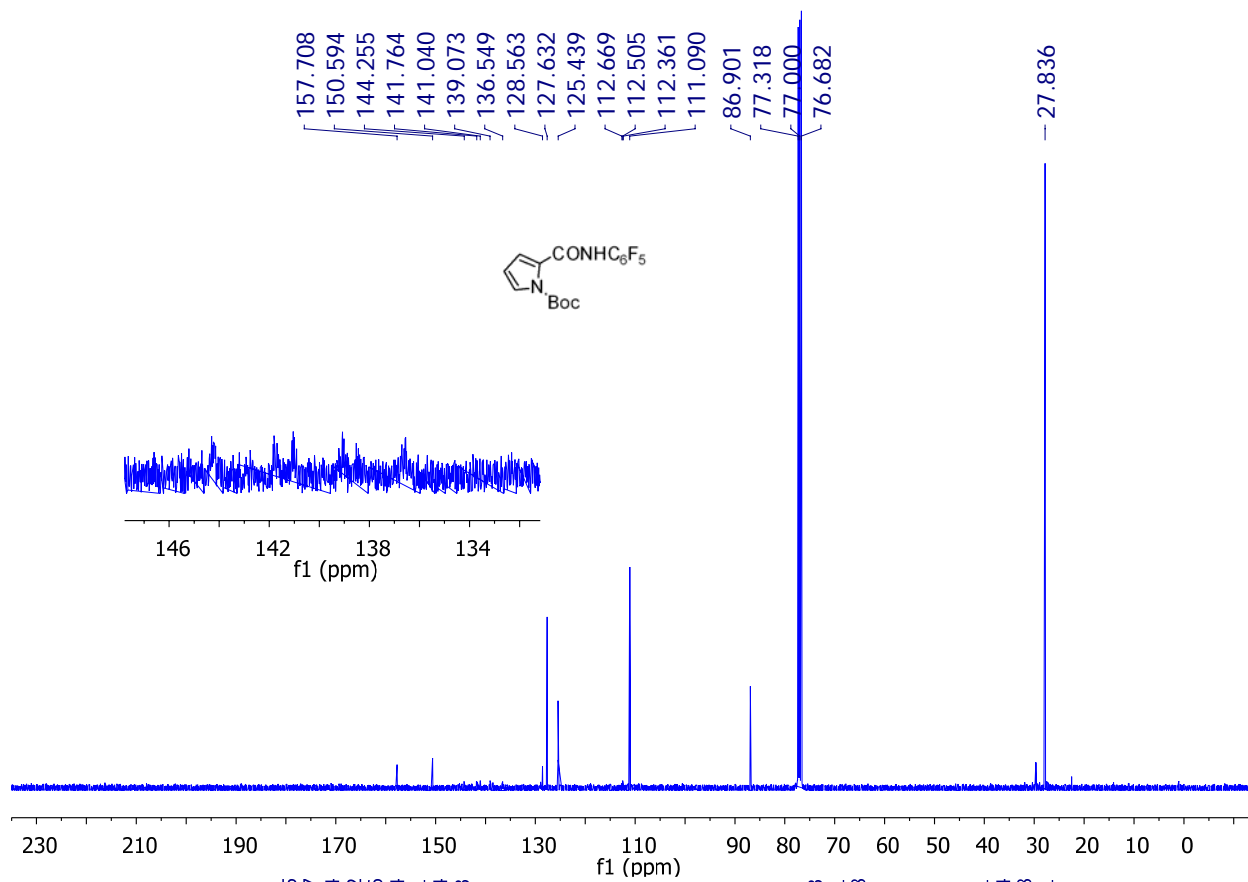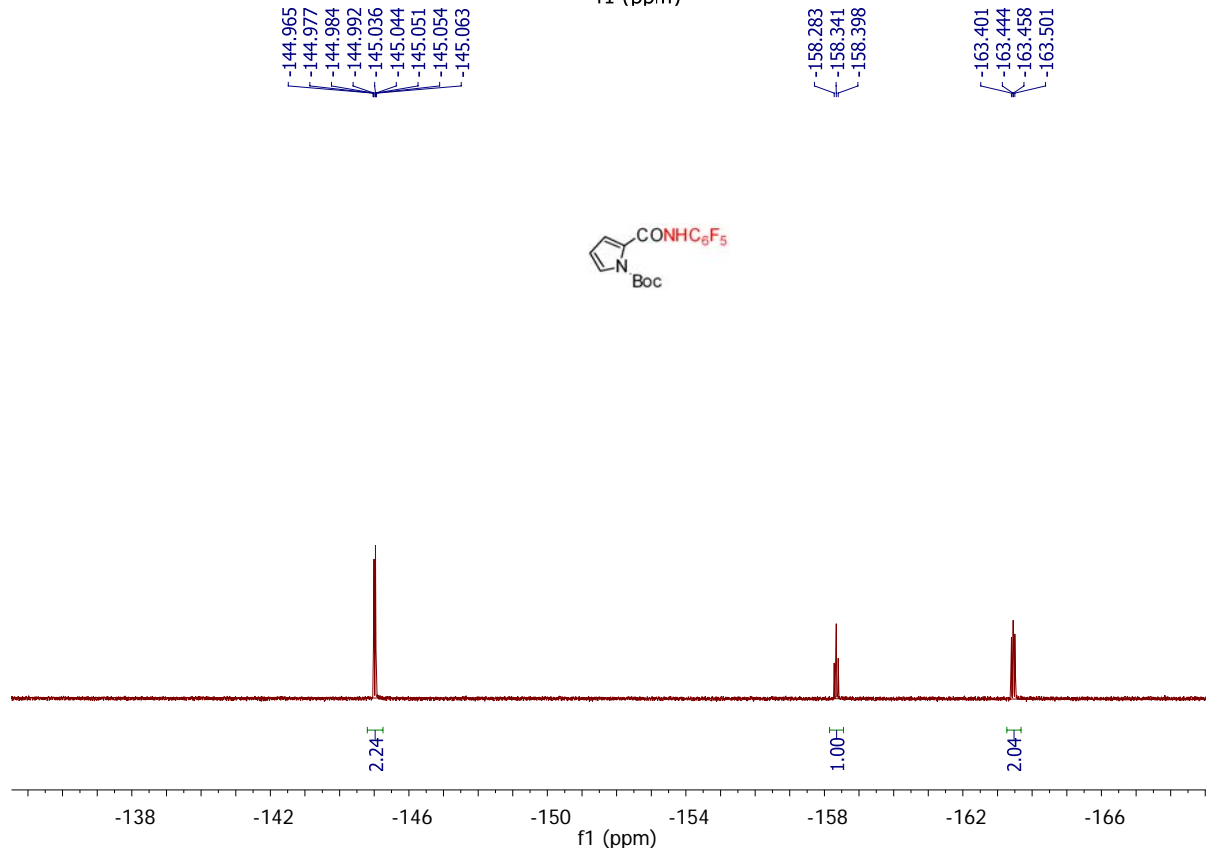

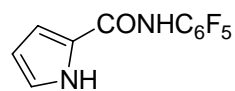

3ua

### NMR of compound 3sa

11.036  
9.386  
7.095  
7.072  
6.249  
6.244  
6.239  
6.237  
6.232  
5.602  
3.051  
2.050

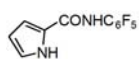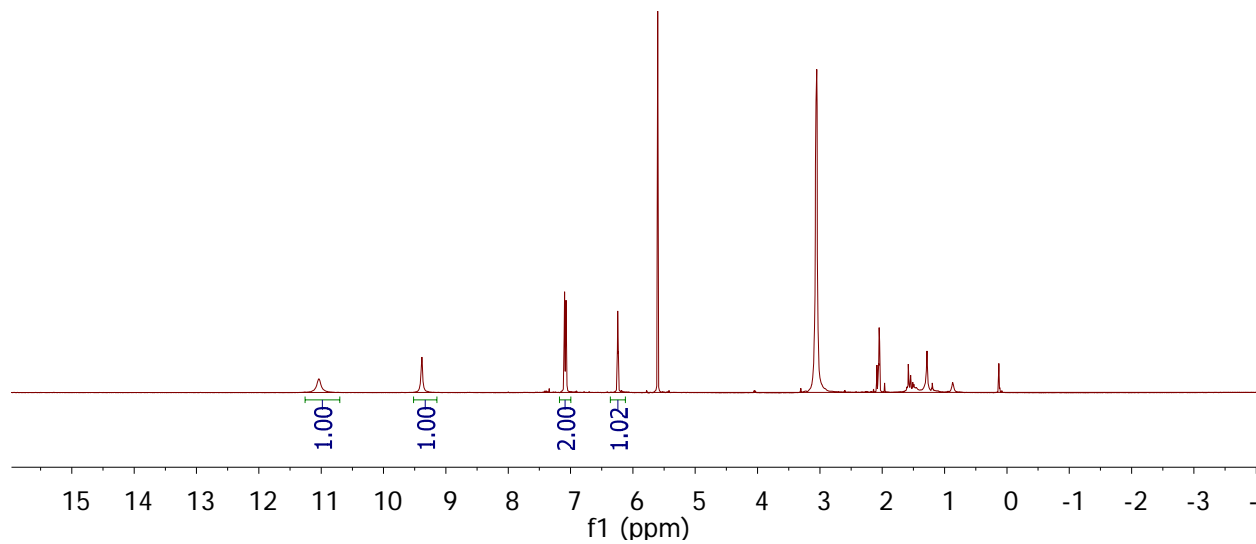

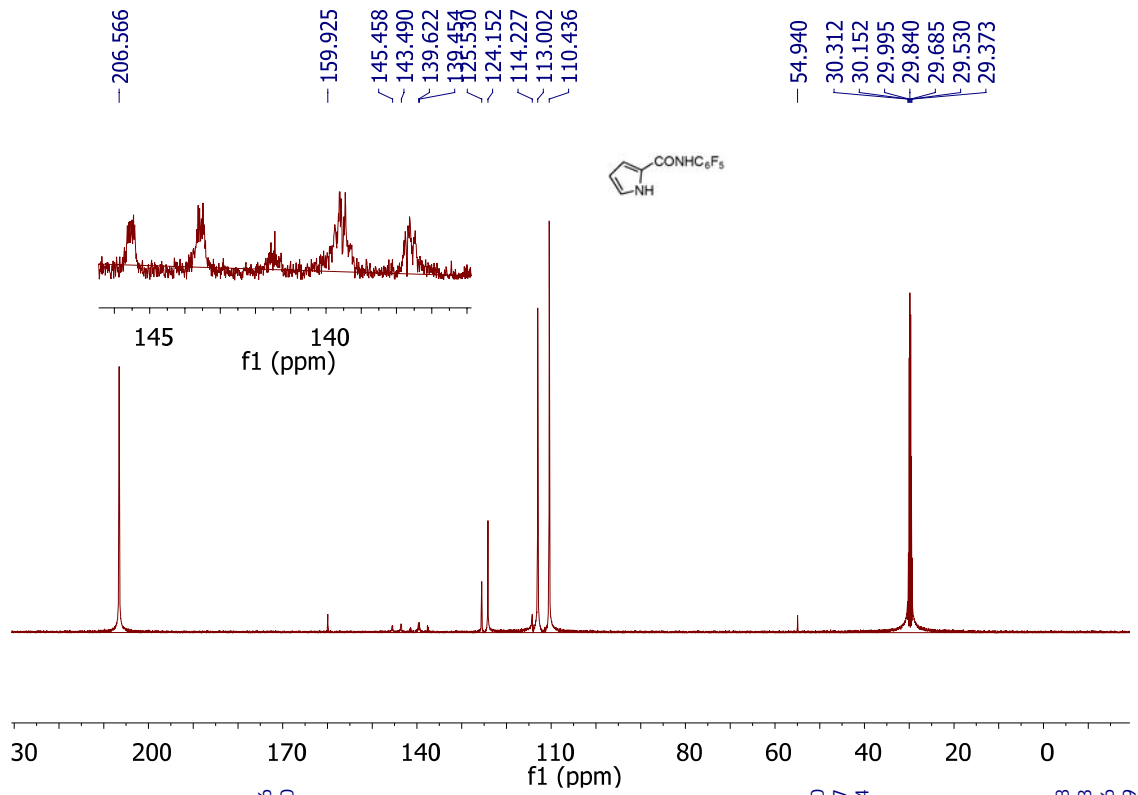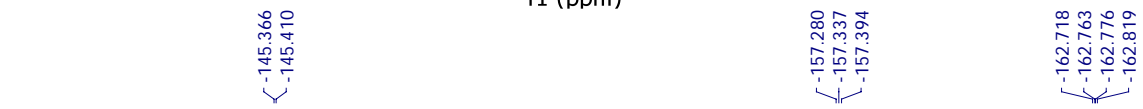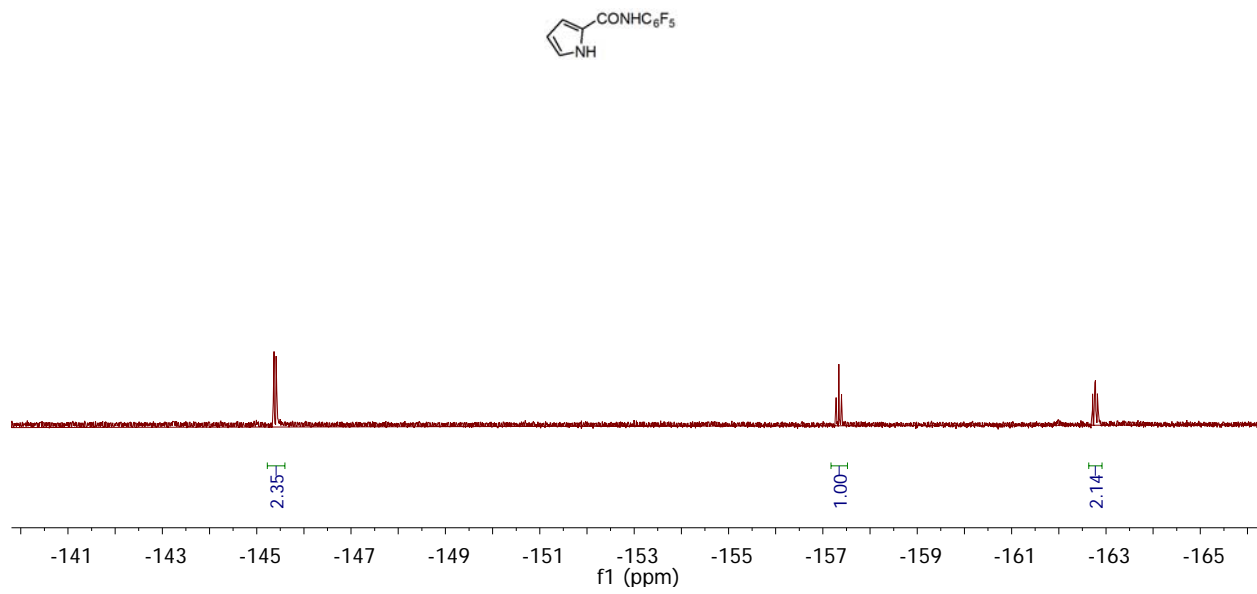

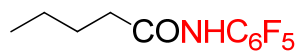

3va

NMR of compound 3va

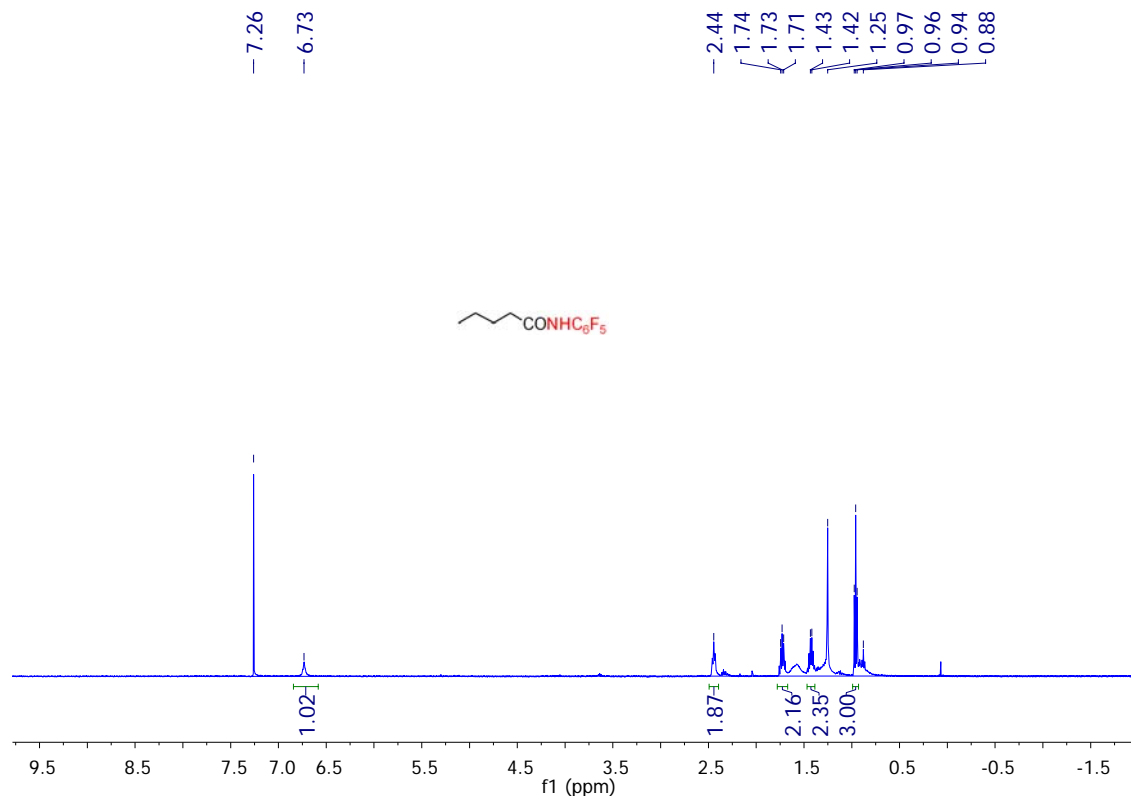

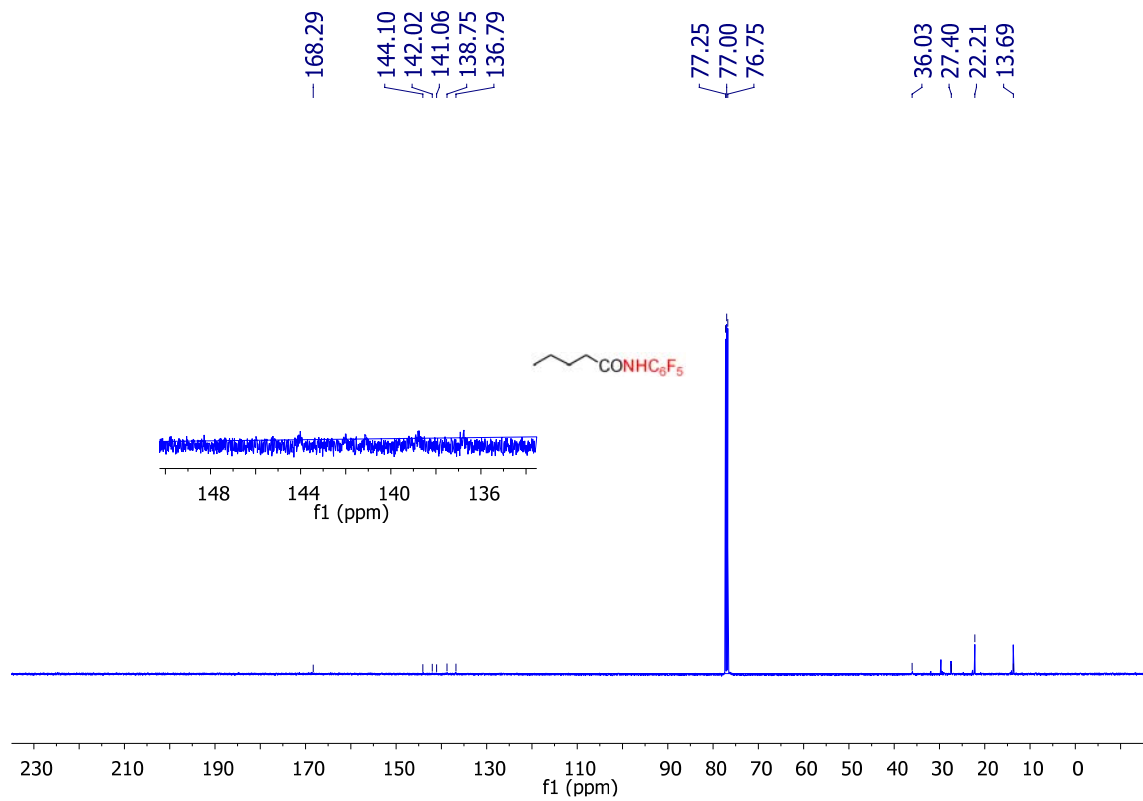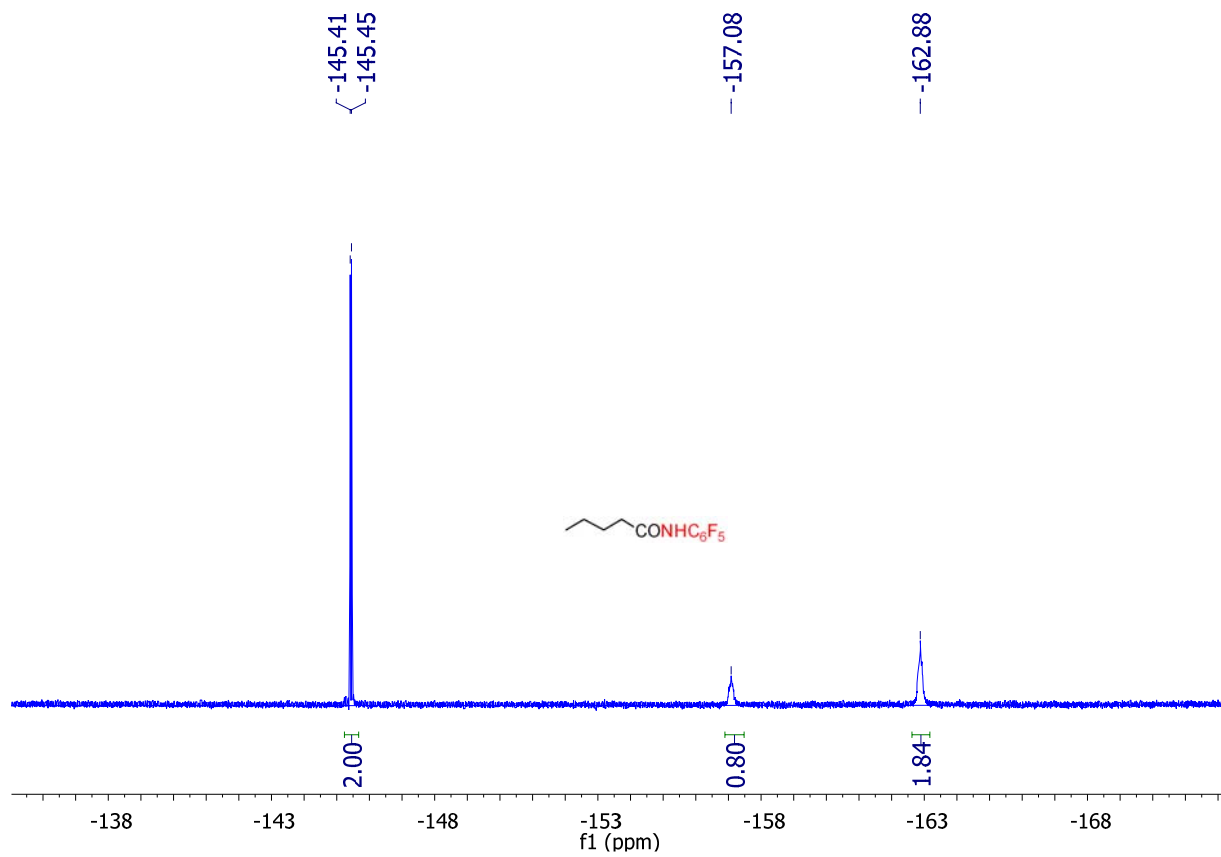

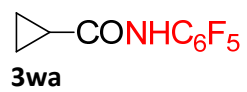

### NMR of compound 3wa

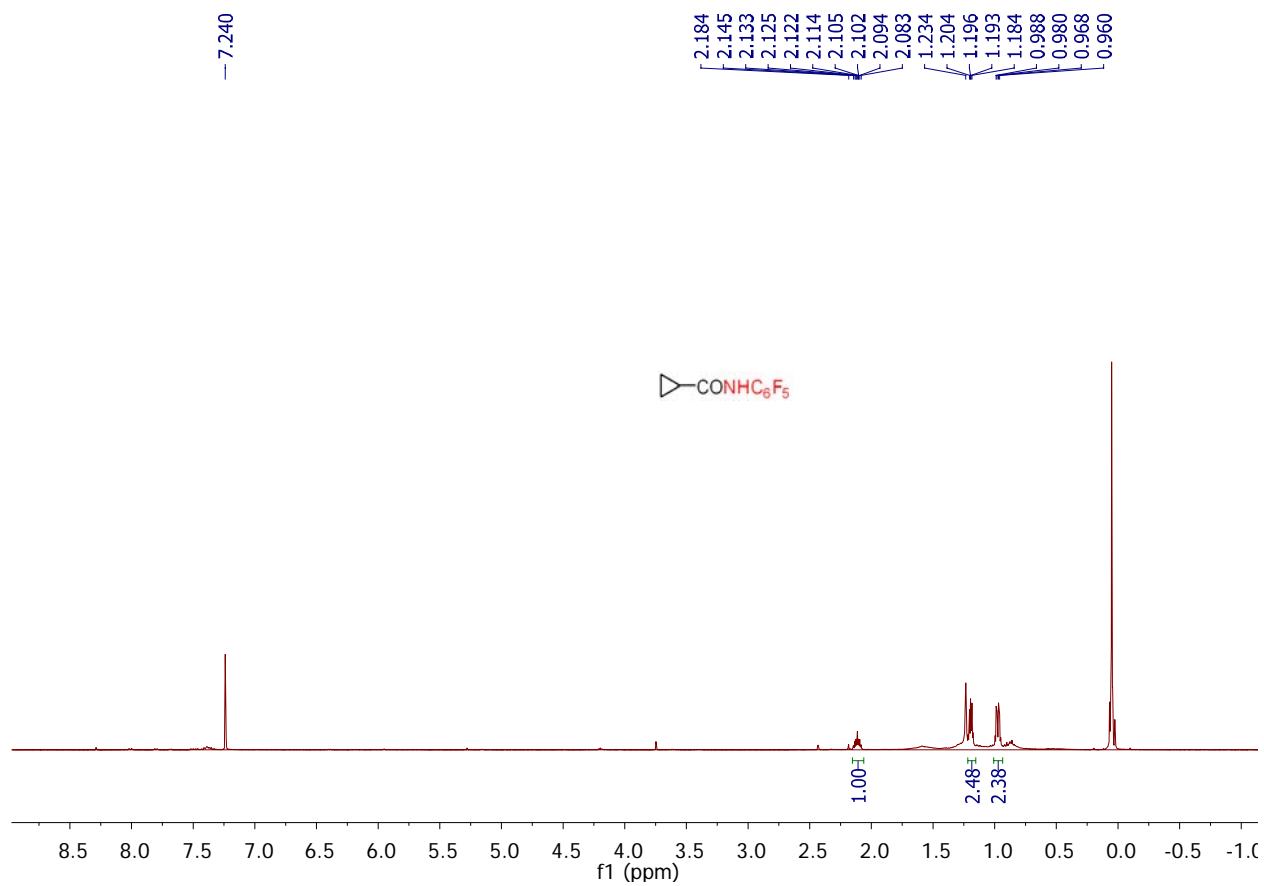

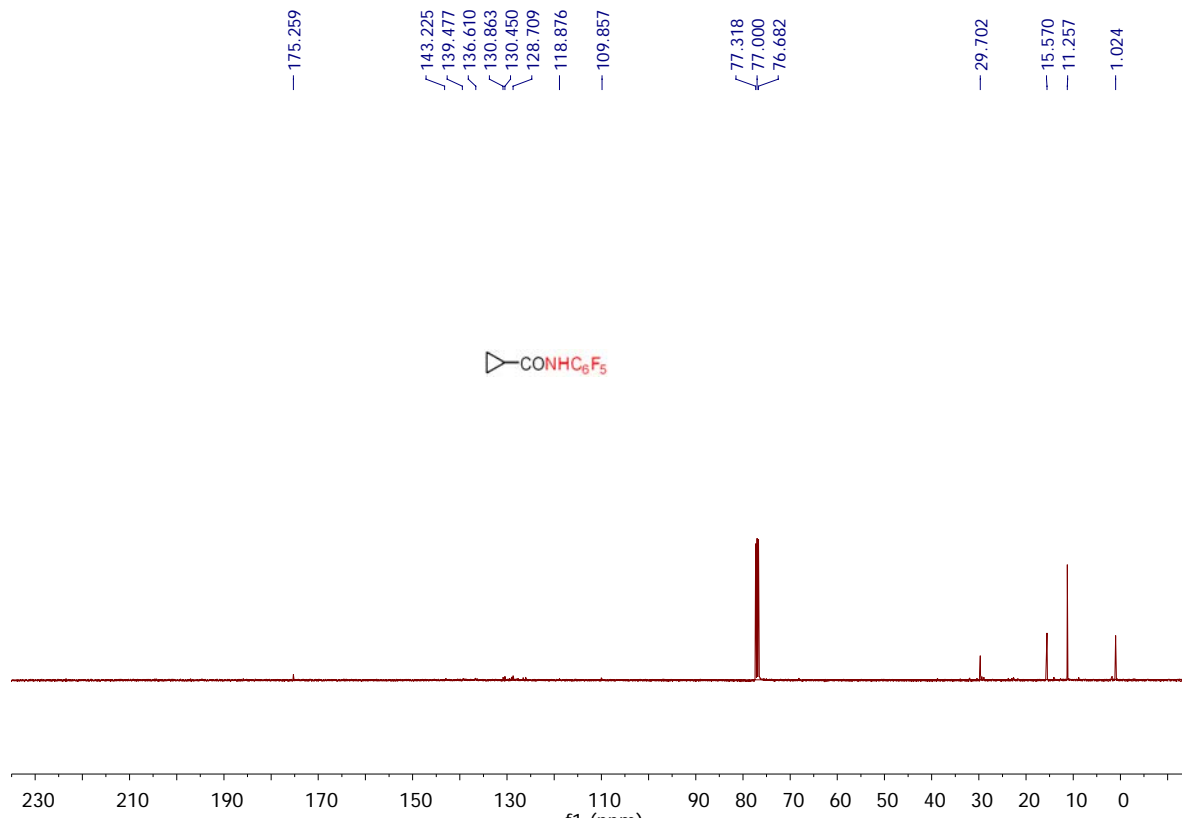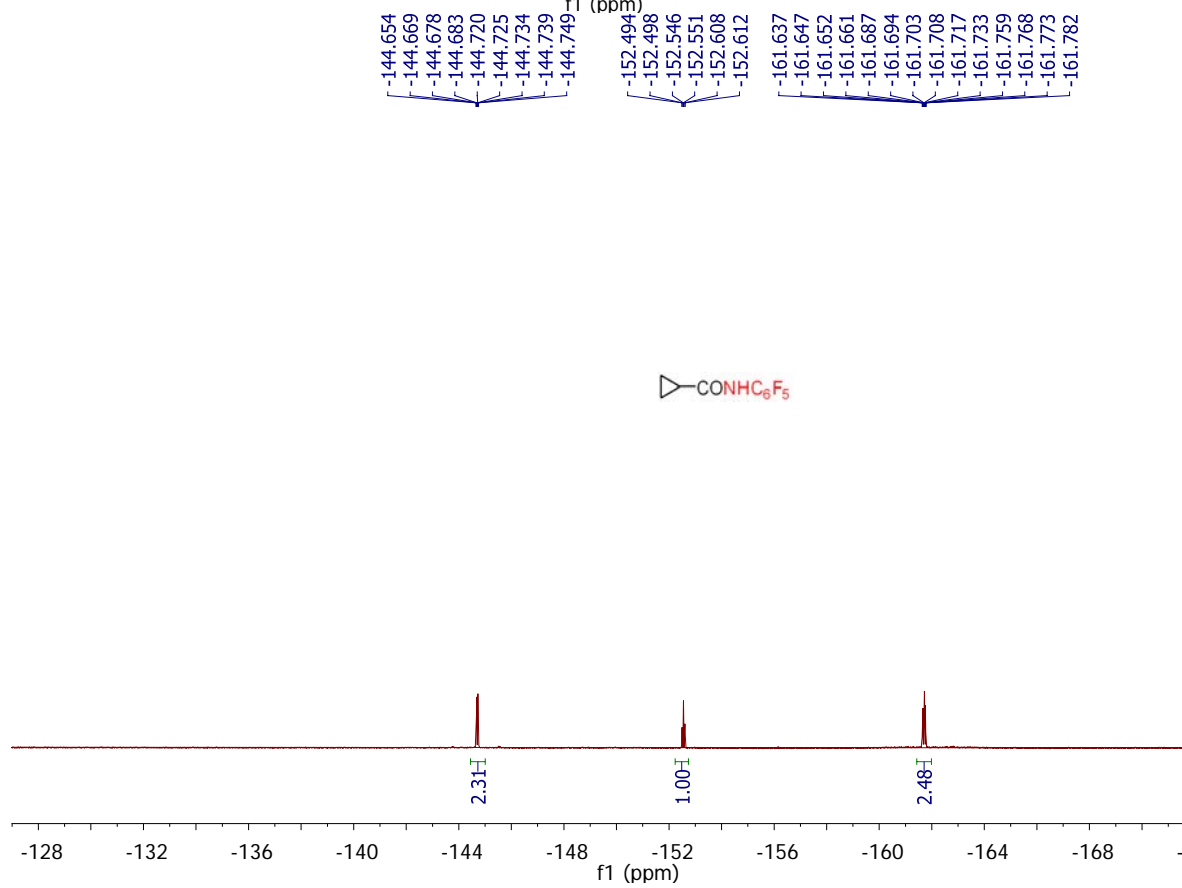

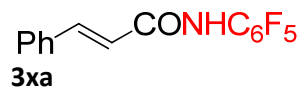

### NMR of compound 3xa

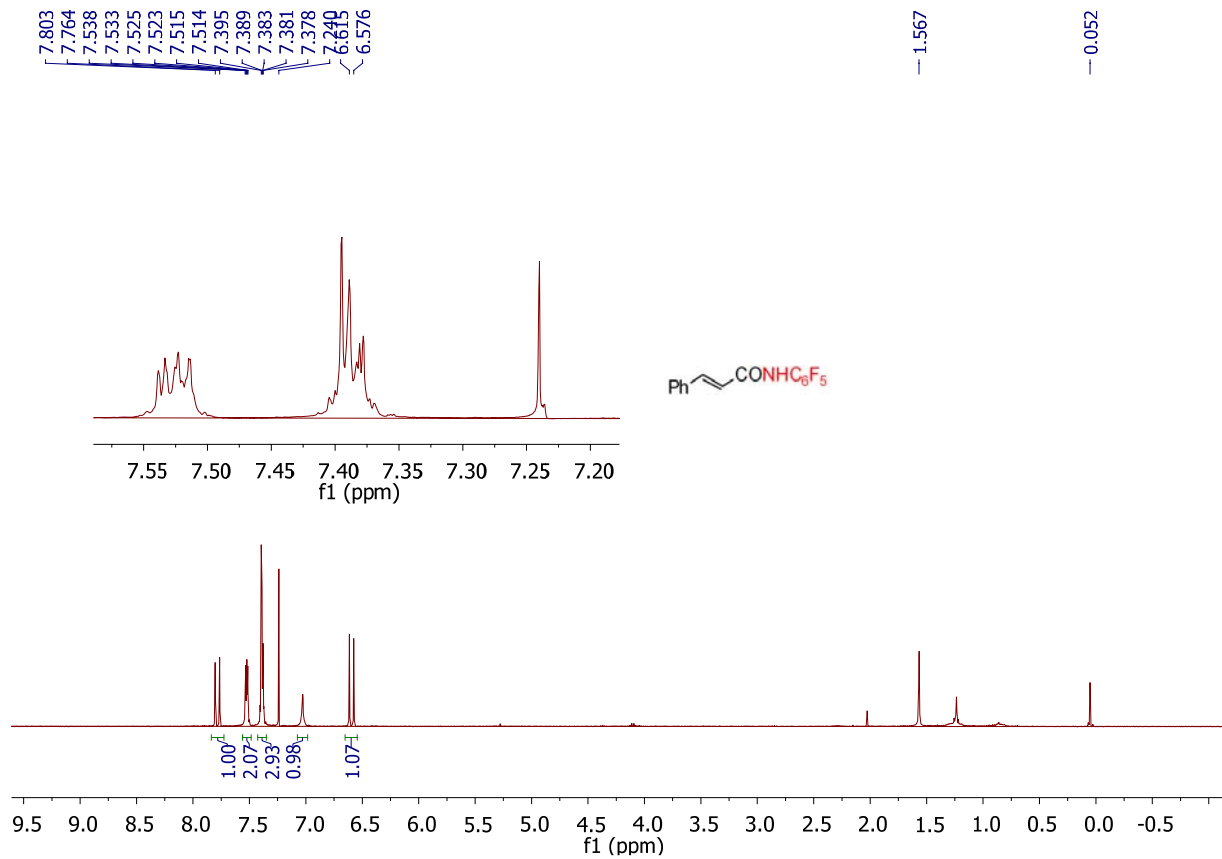



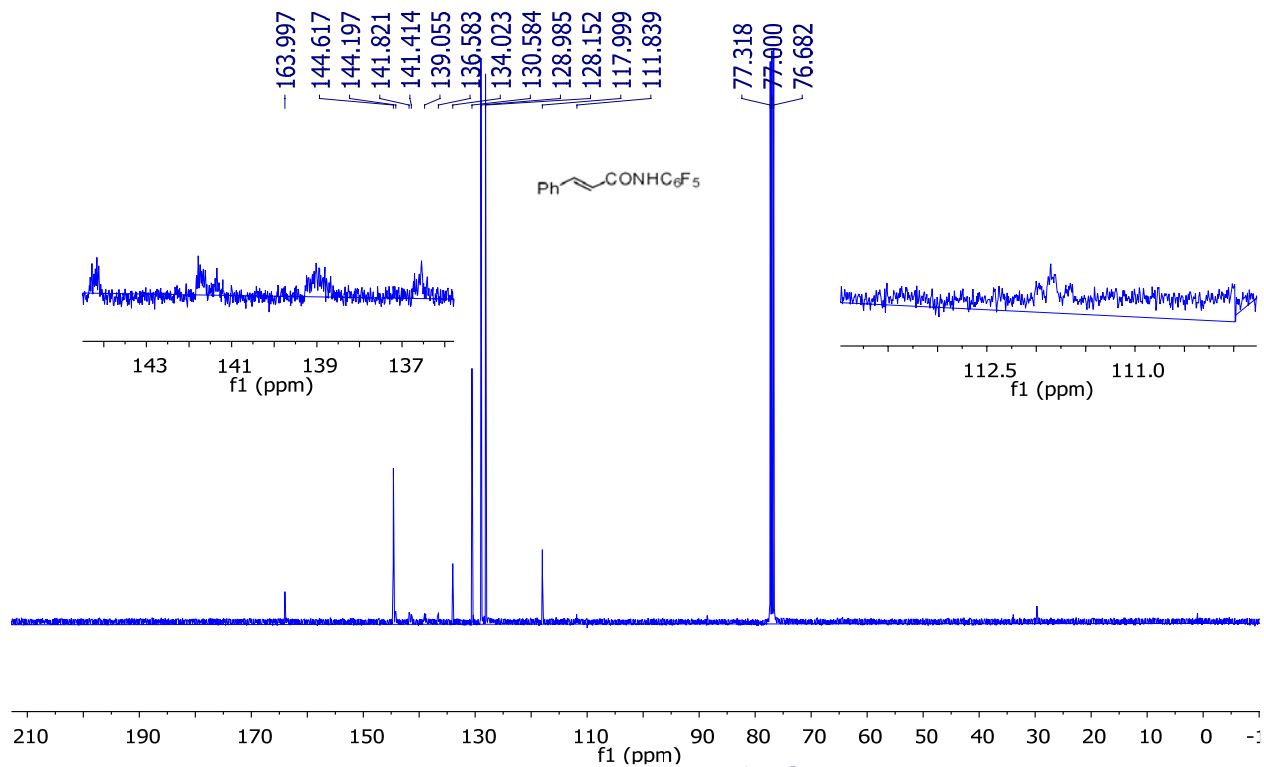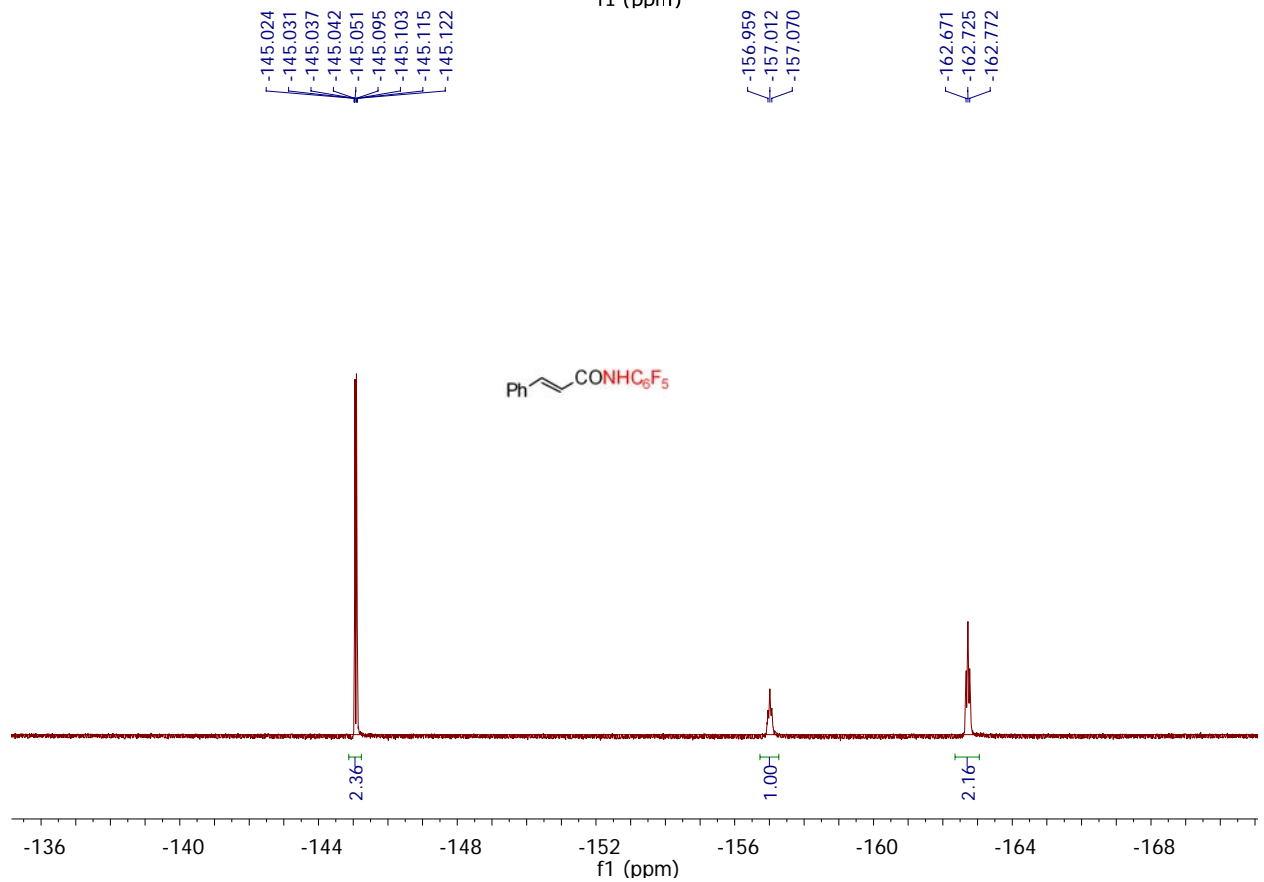

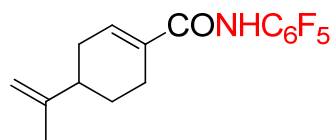

3ya

### NMR of compound 3ya

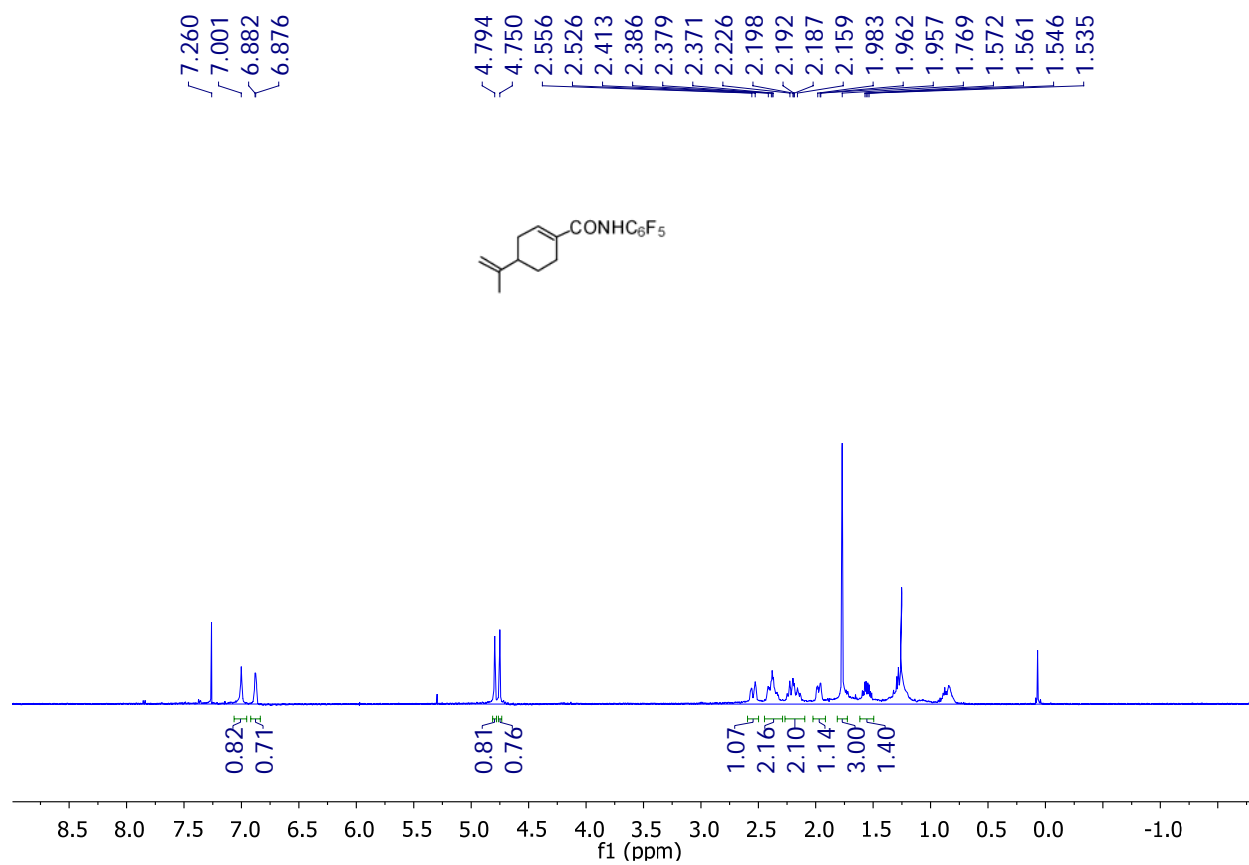

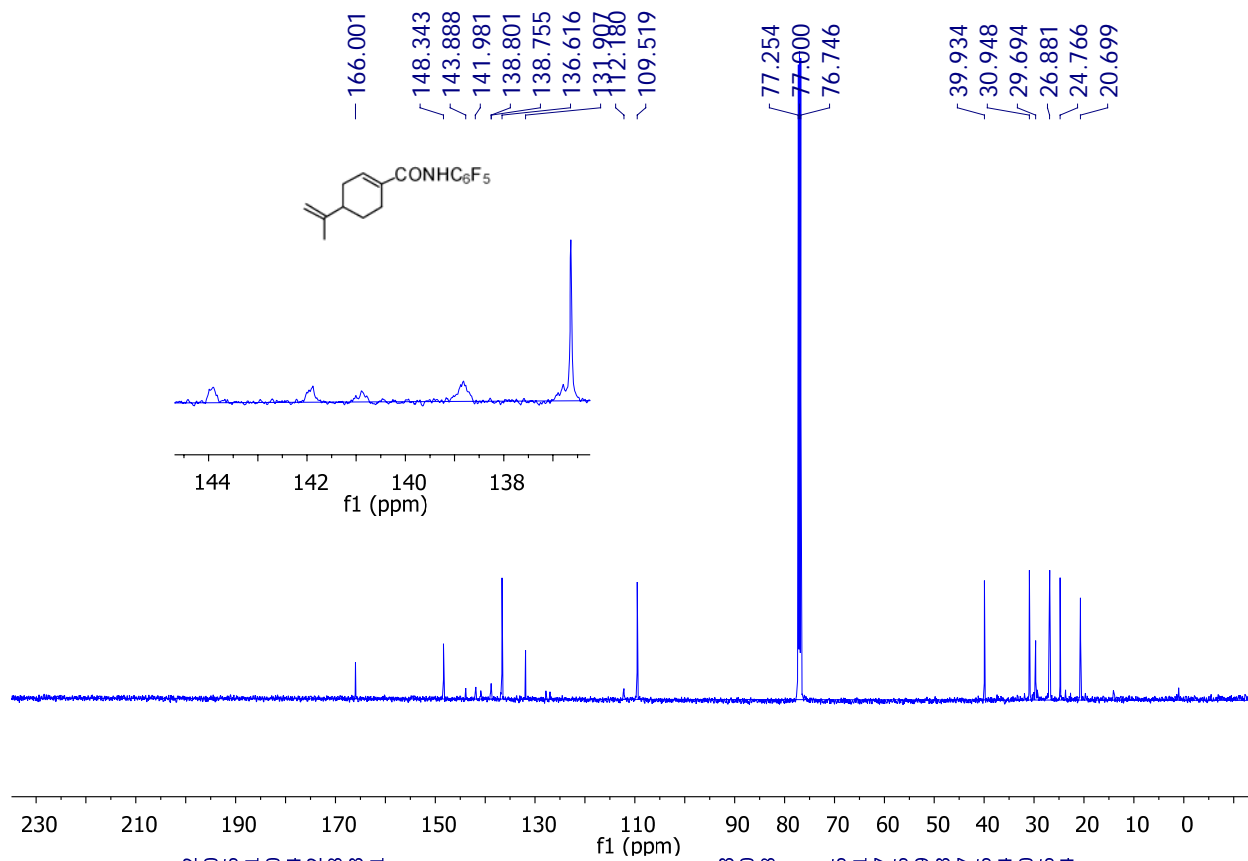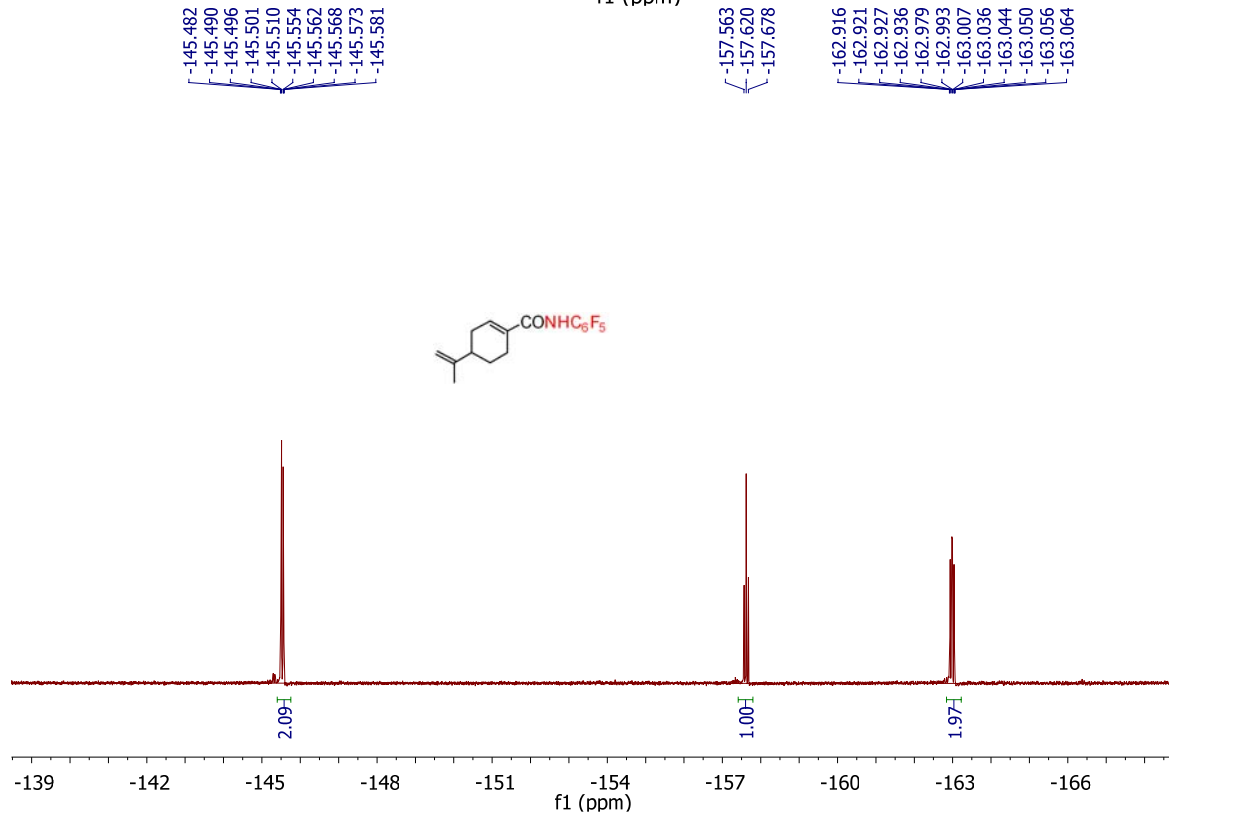

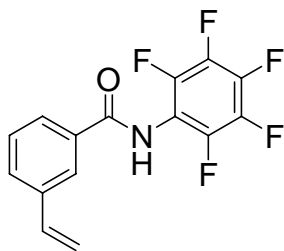

**3za**

**NMR of compound 3za**

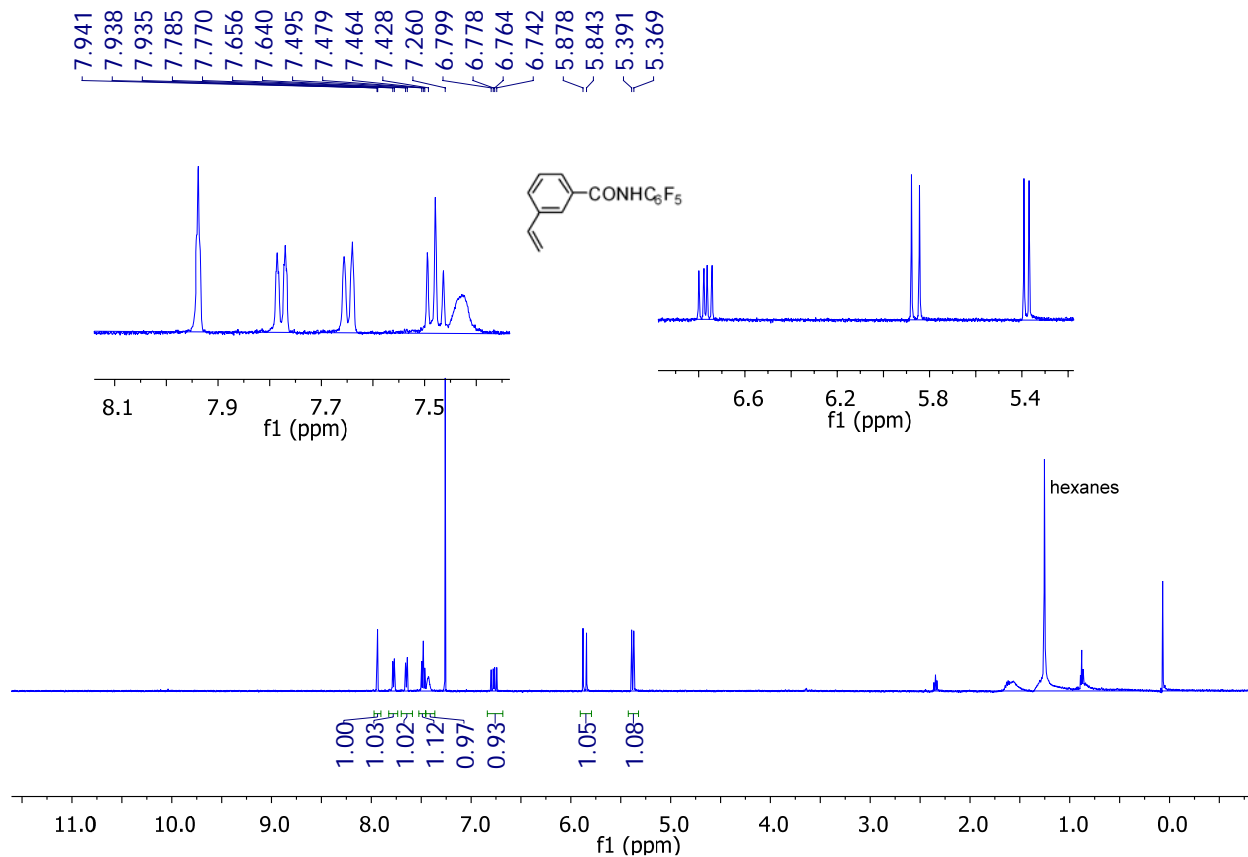

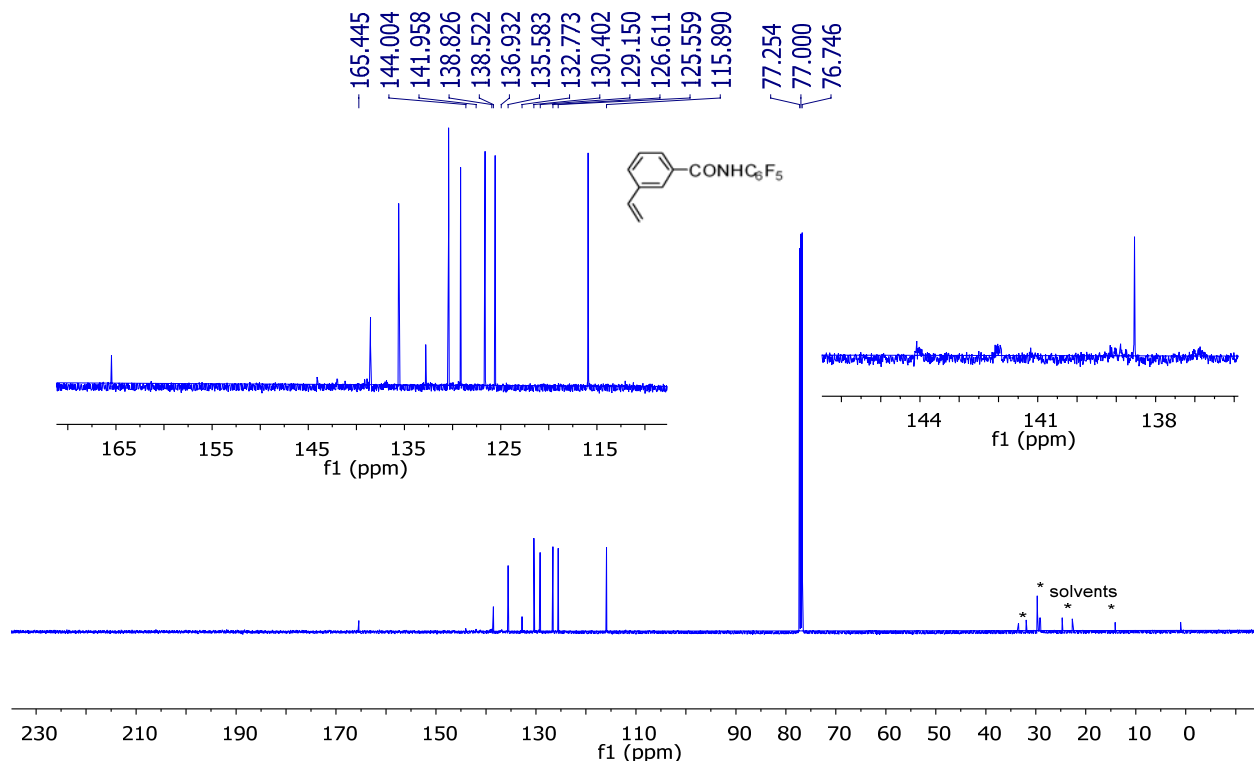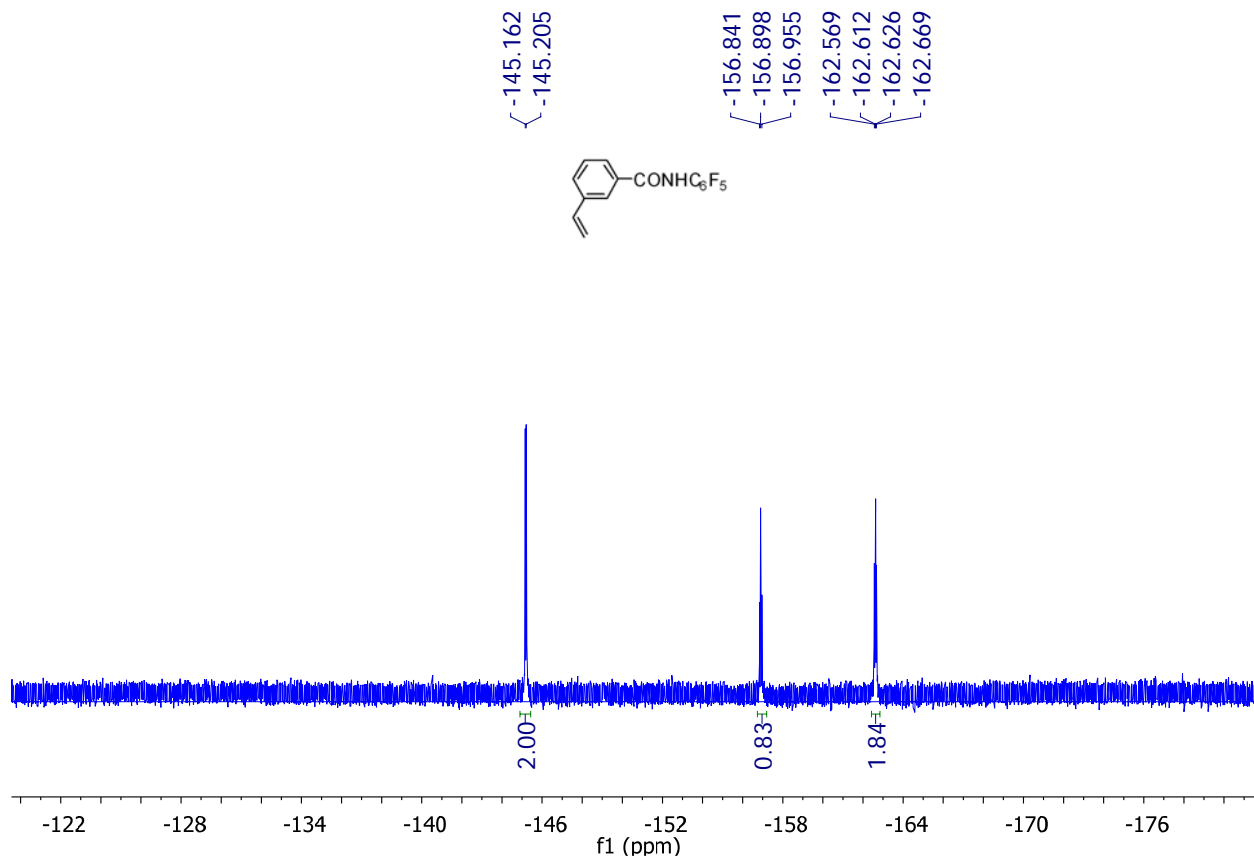

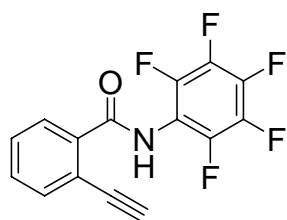

**3zaa**

**NMR of compound 3zaa**

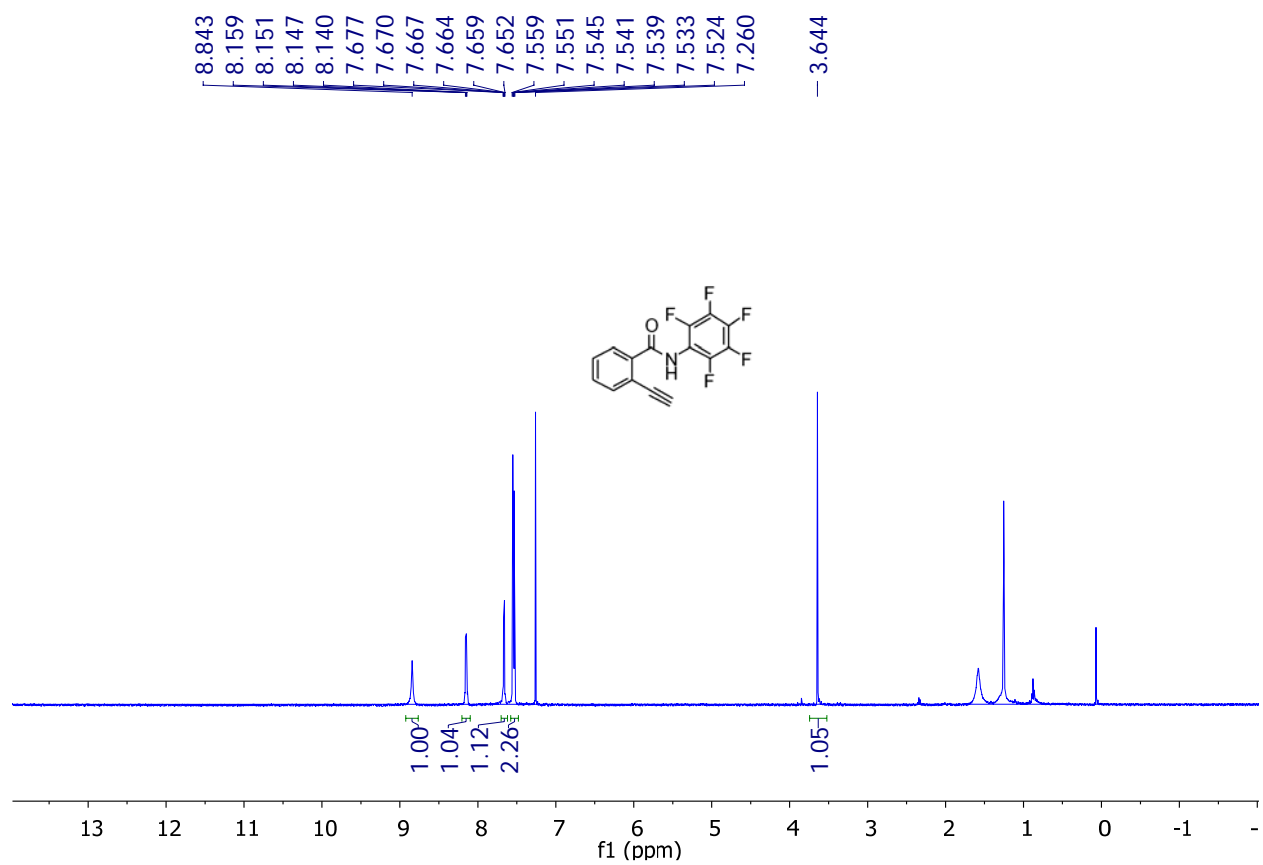

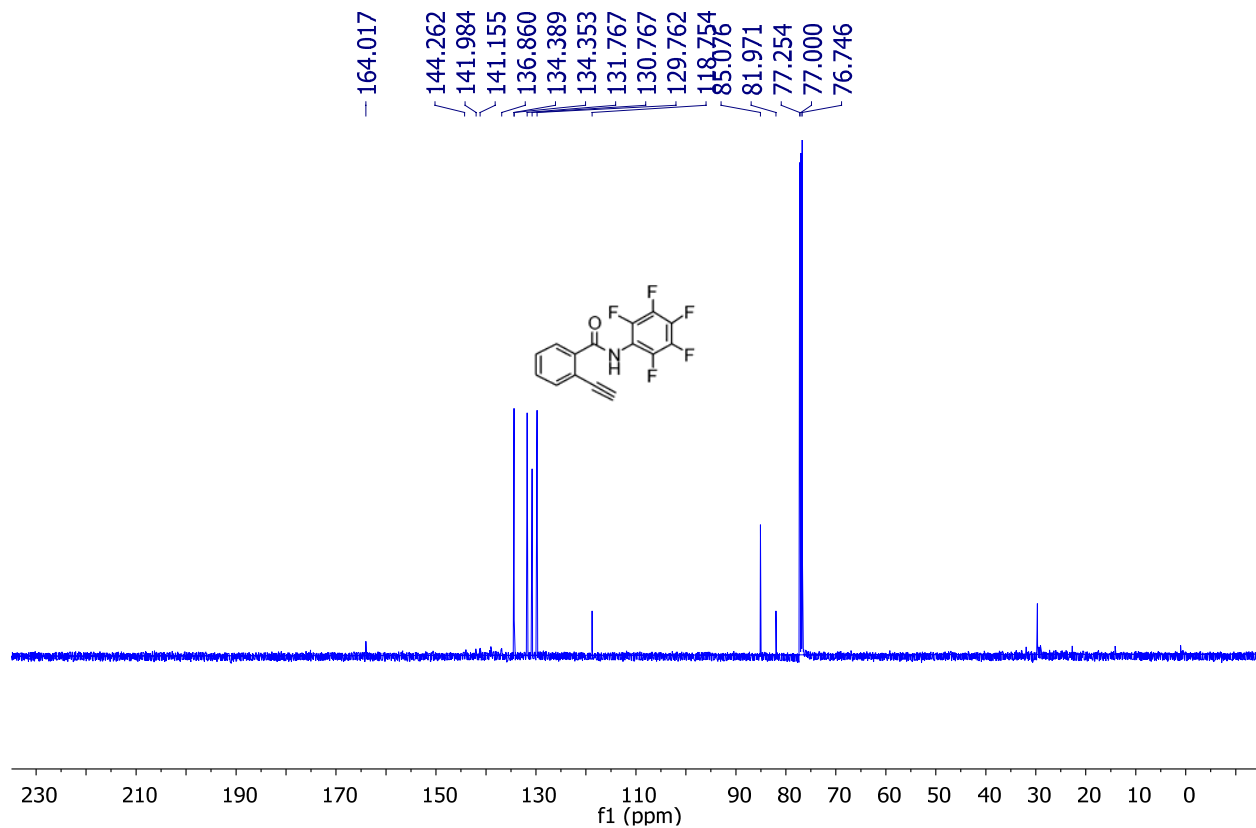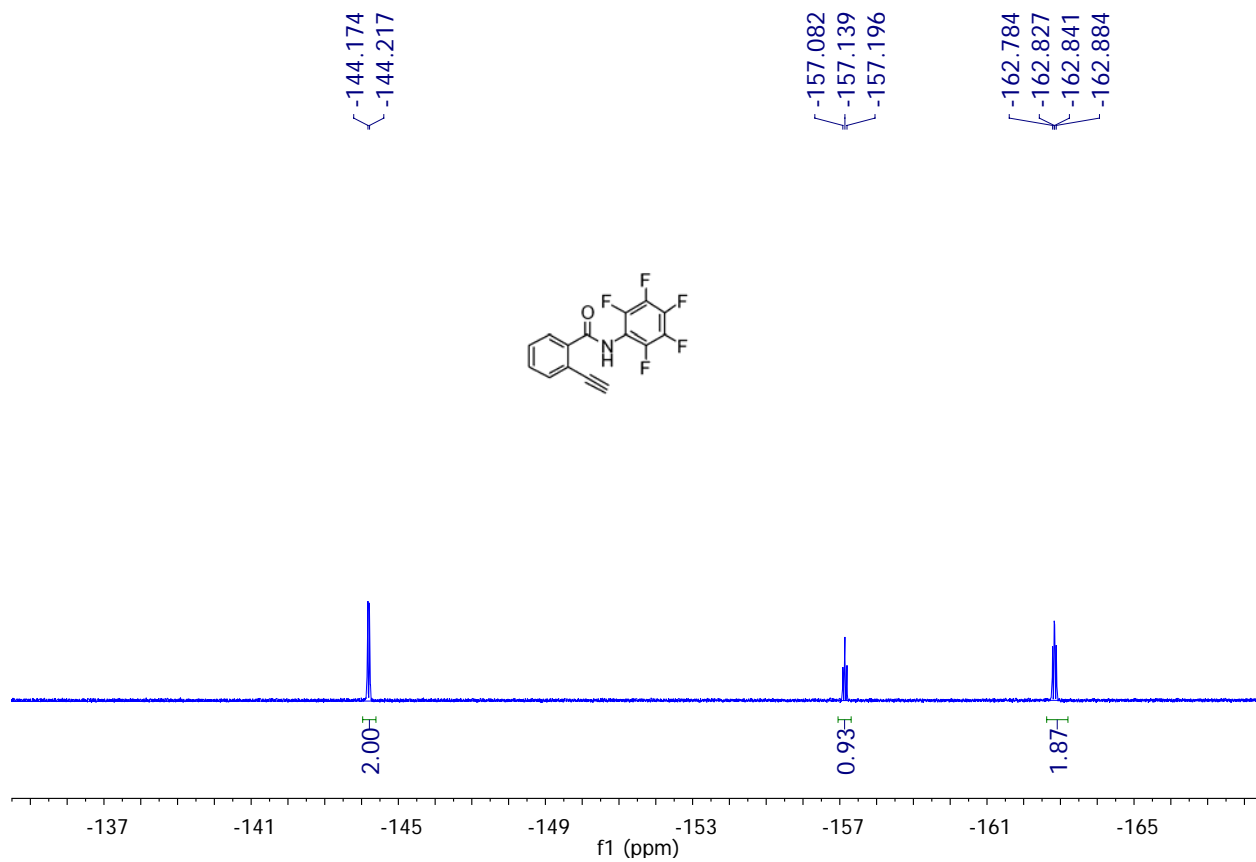

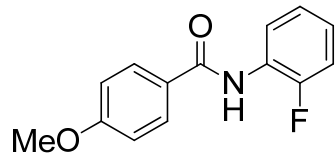

**3bb**

**NMR of compound 3bb**

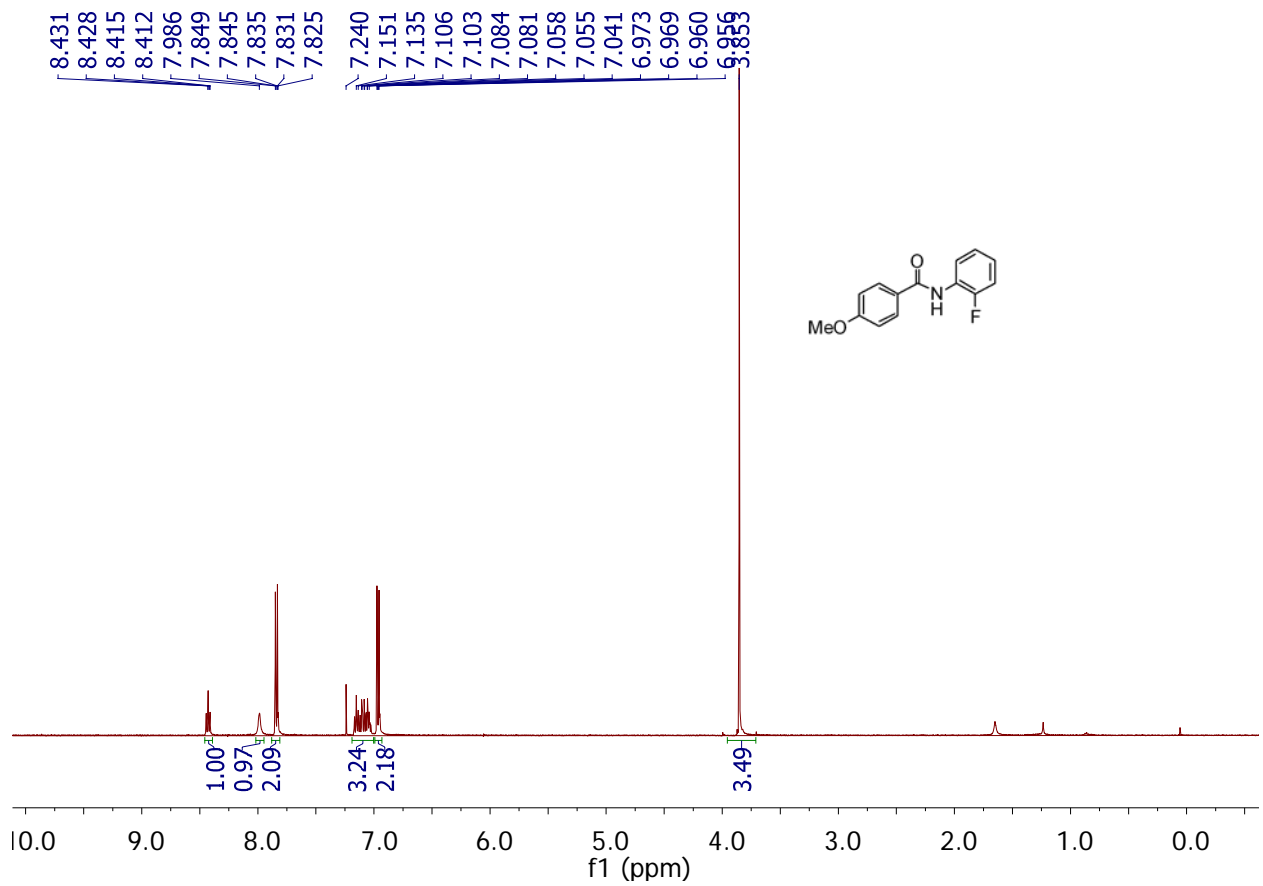



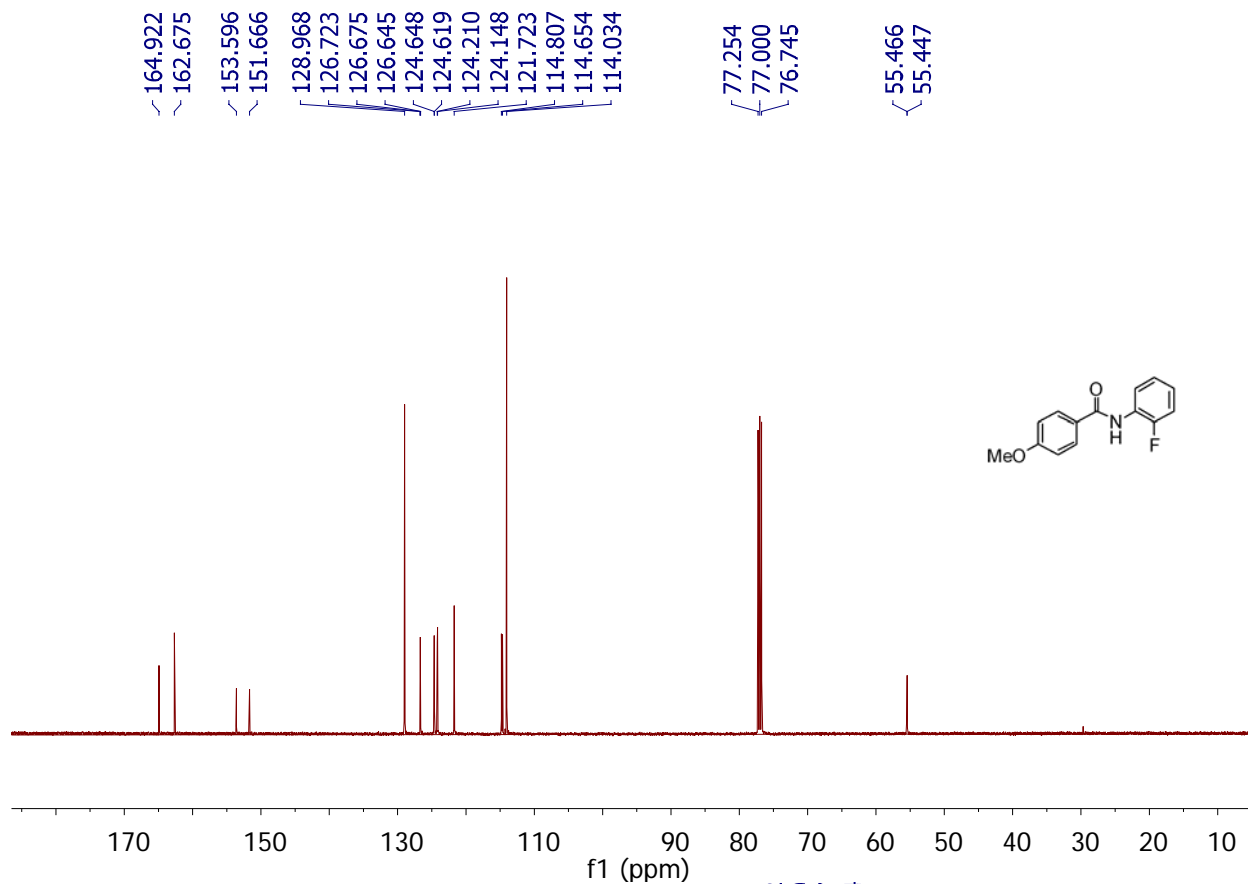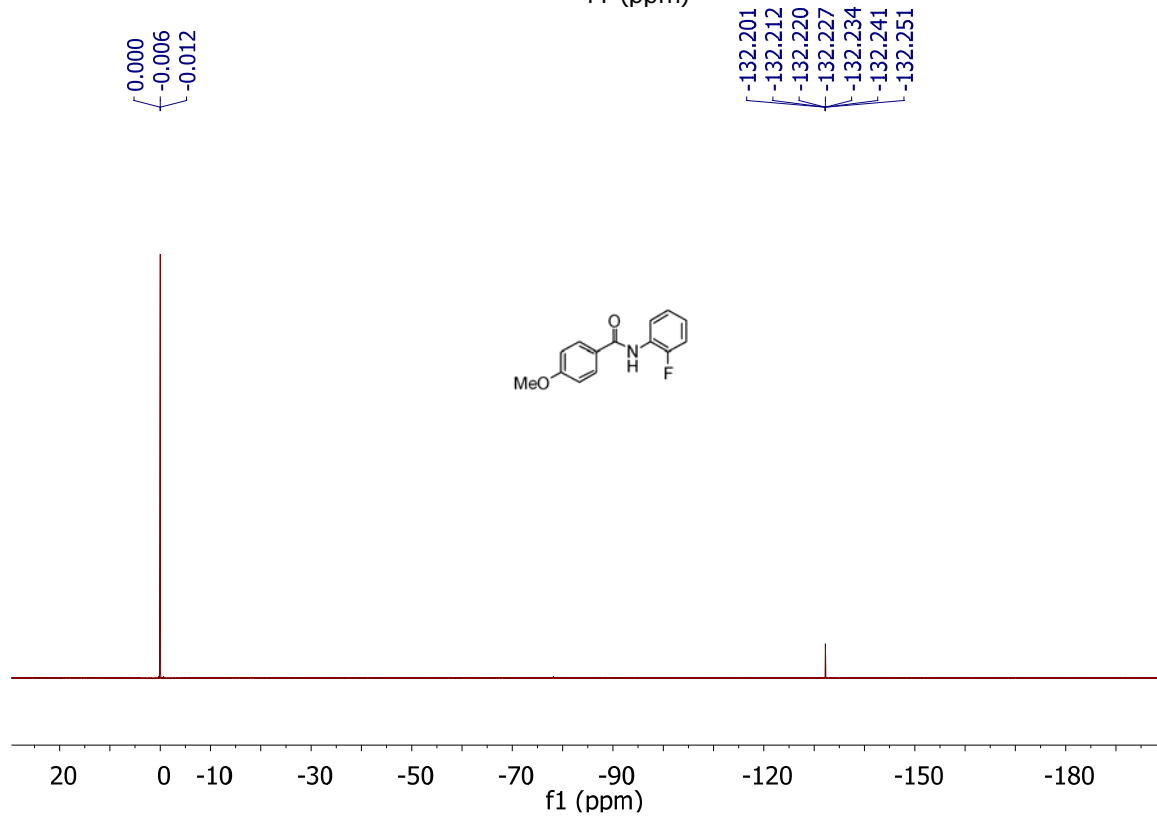

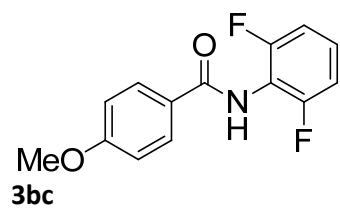

**NMR of compound 3bc**

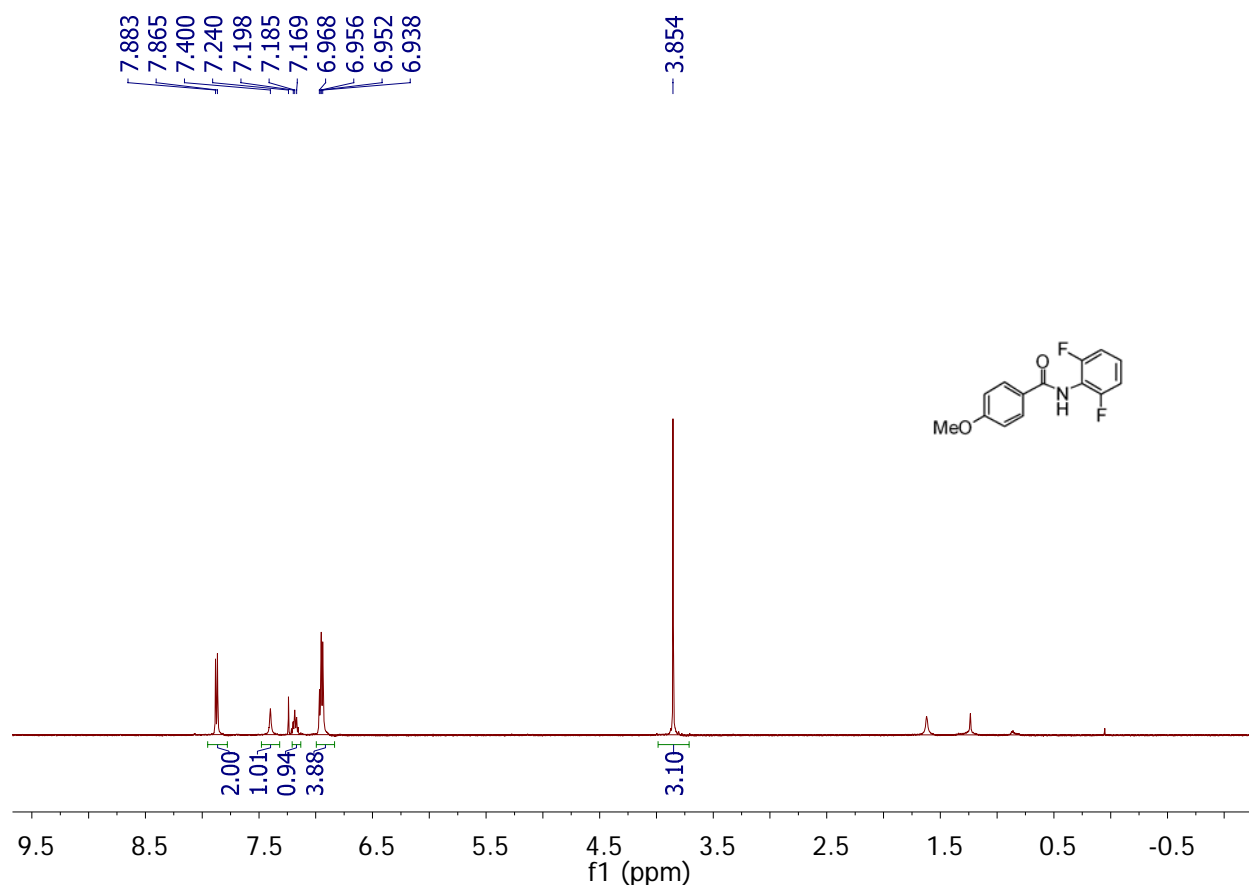

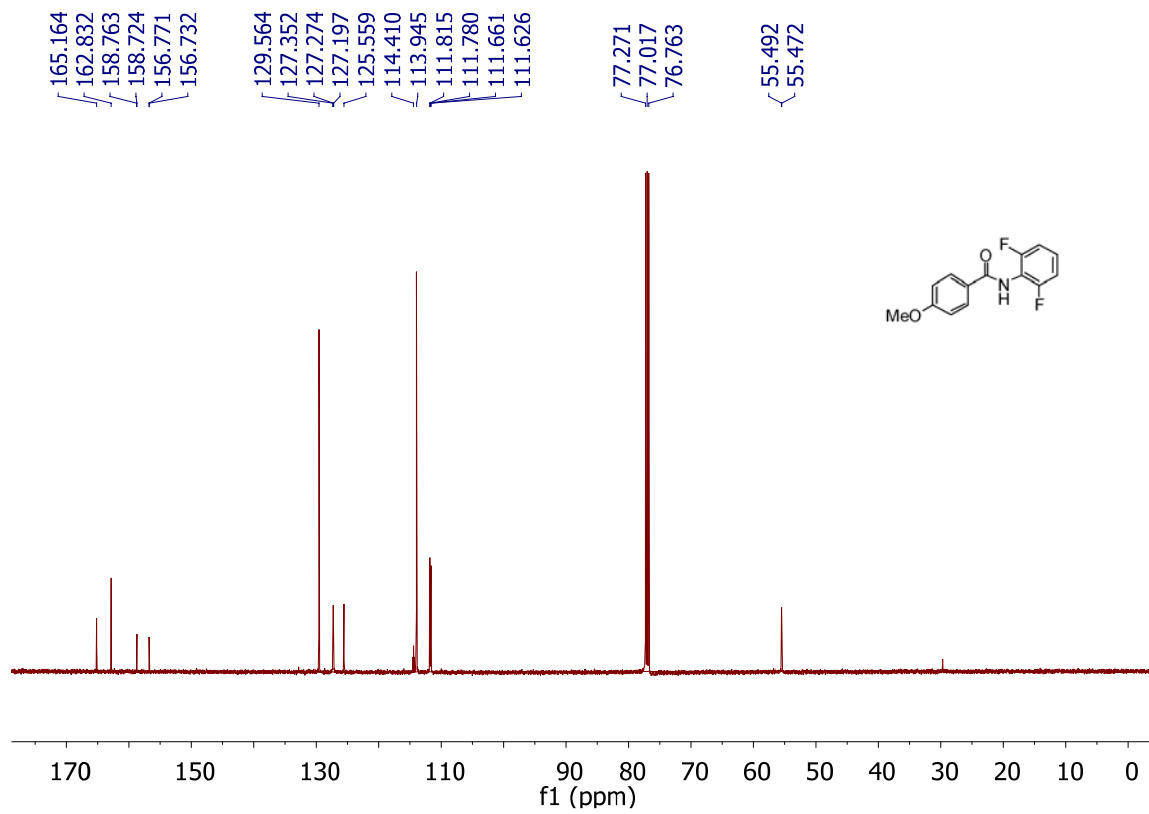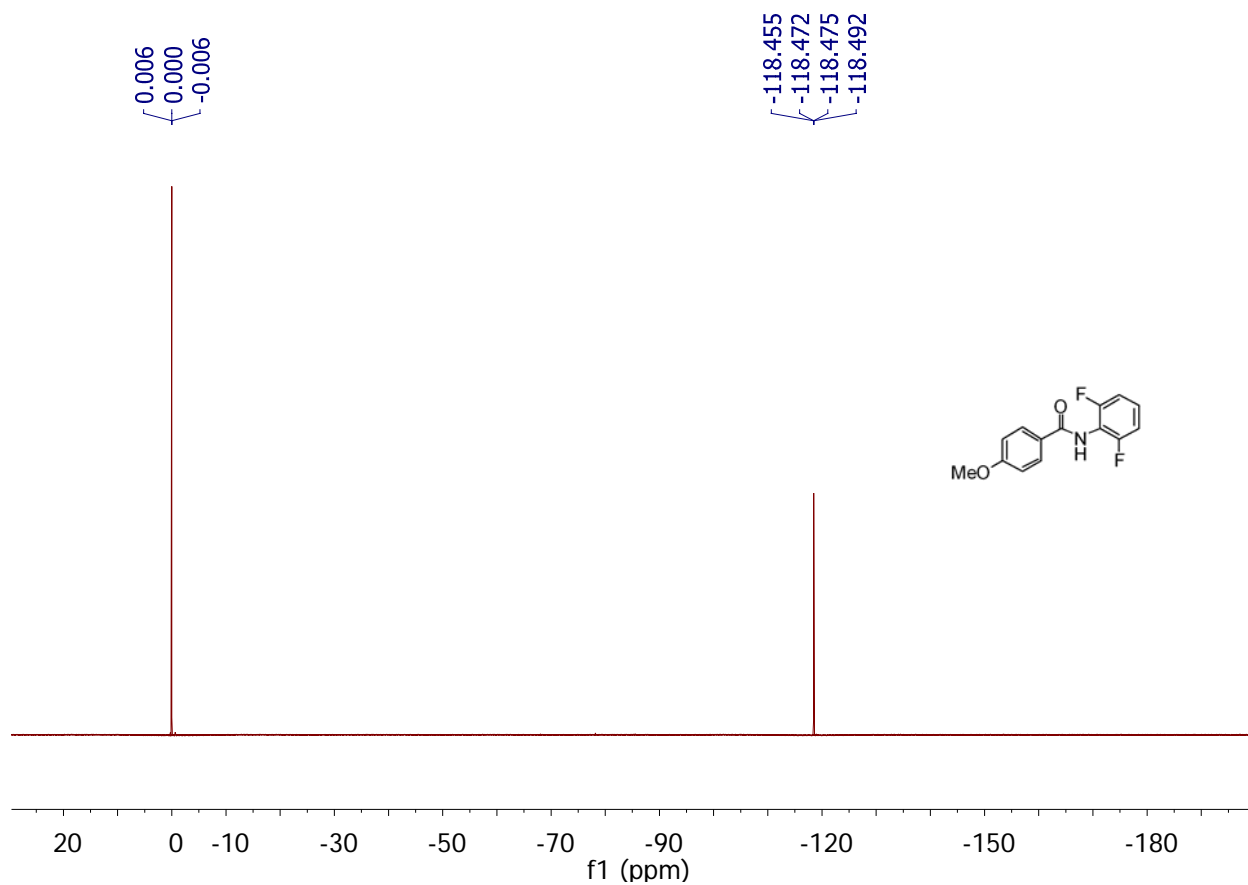

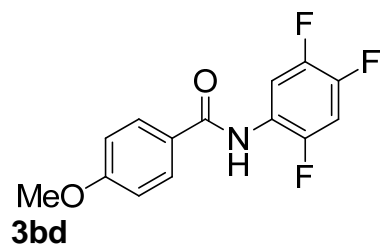

**NMR of compound 3bd**

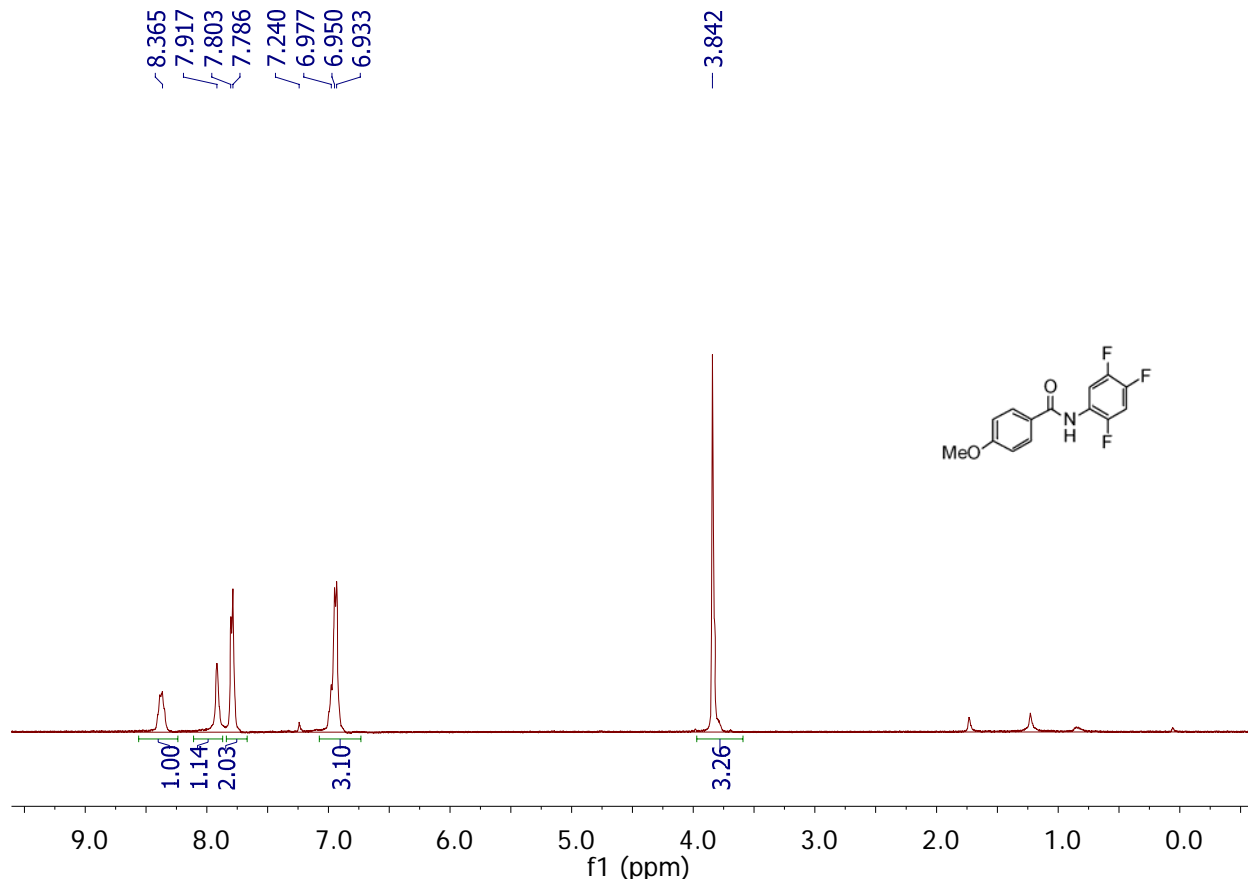

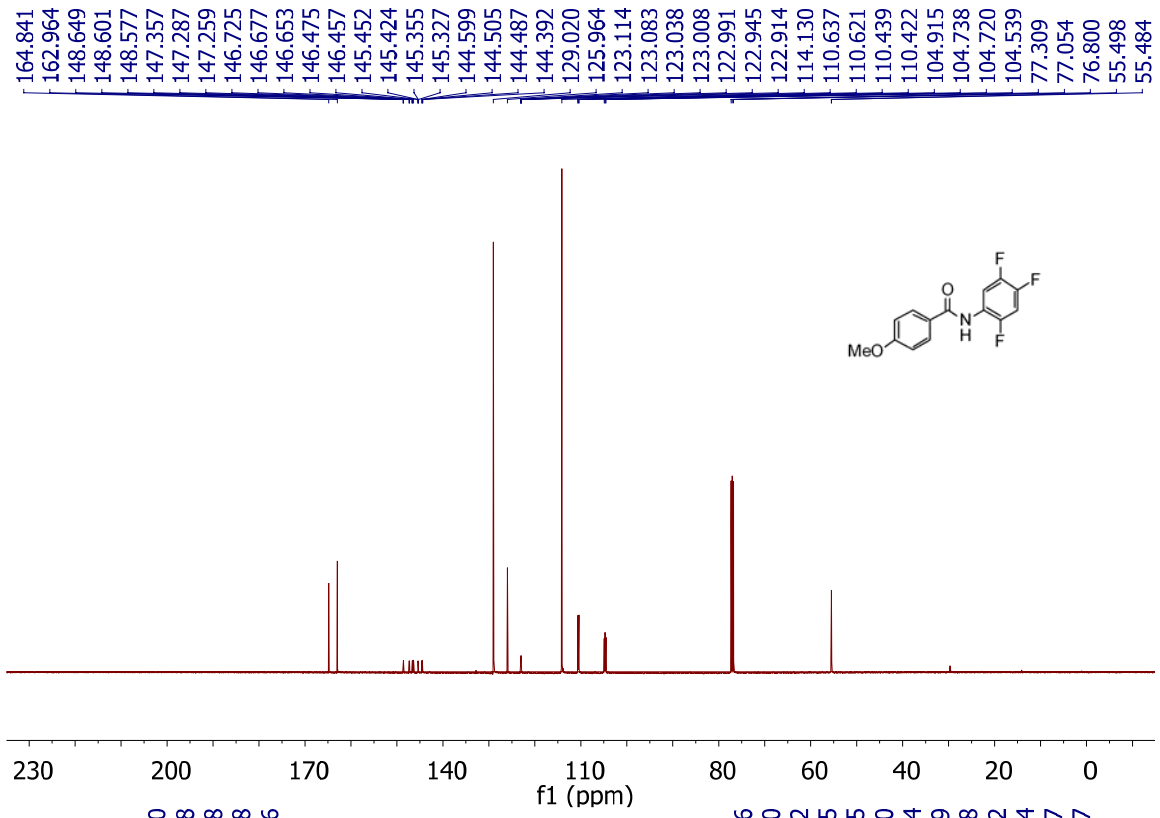

-133.980  
-133.988  
-133.998  
-134.008  
-134.016

-140.136  
-140.160  
-140.162  
-140.185  
-140.195  
-140.220  
-140.244  
-140.589  
-140.608  
-140.612  
-140.644  
-140.647  
-140.667

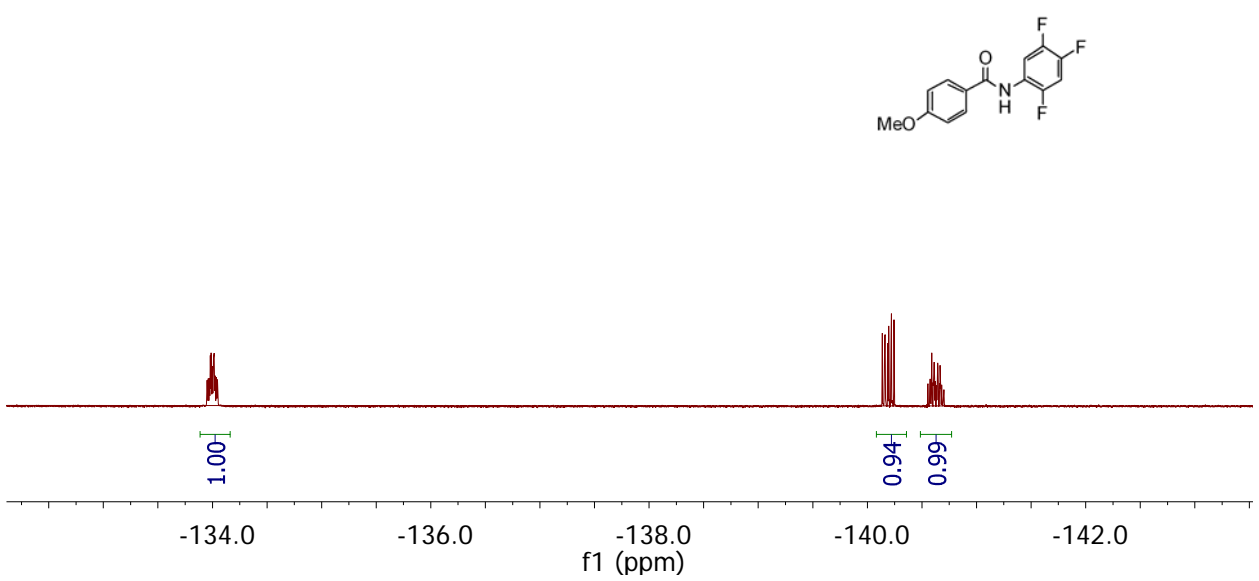

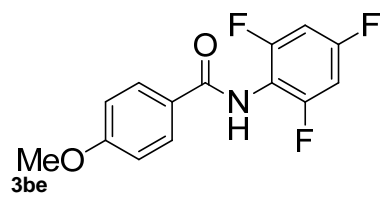

### NMR of compound 3be

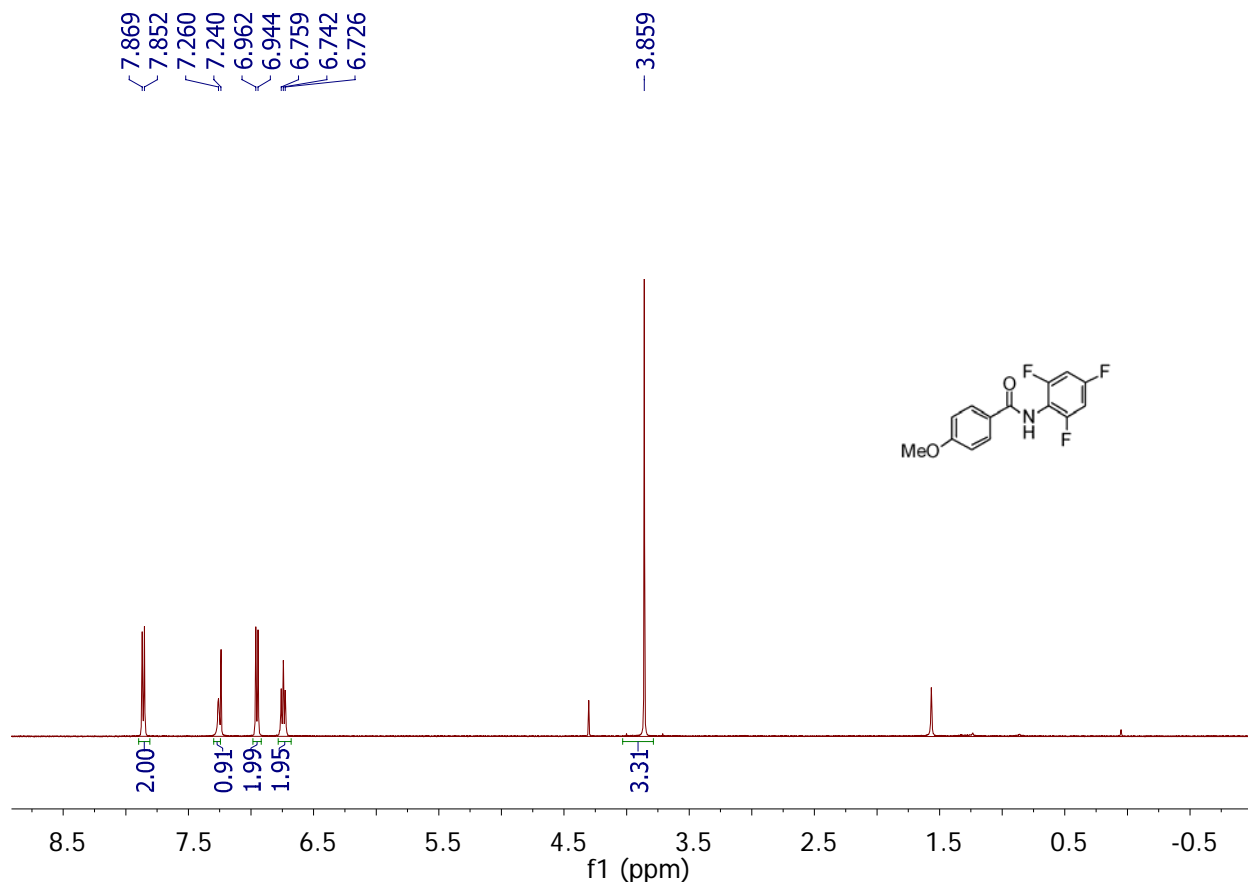

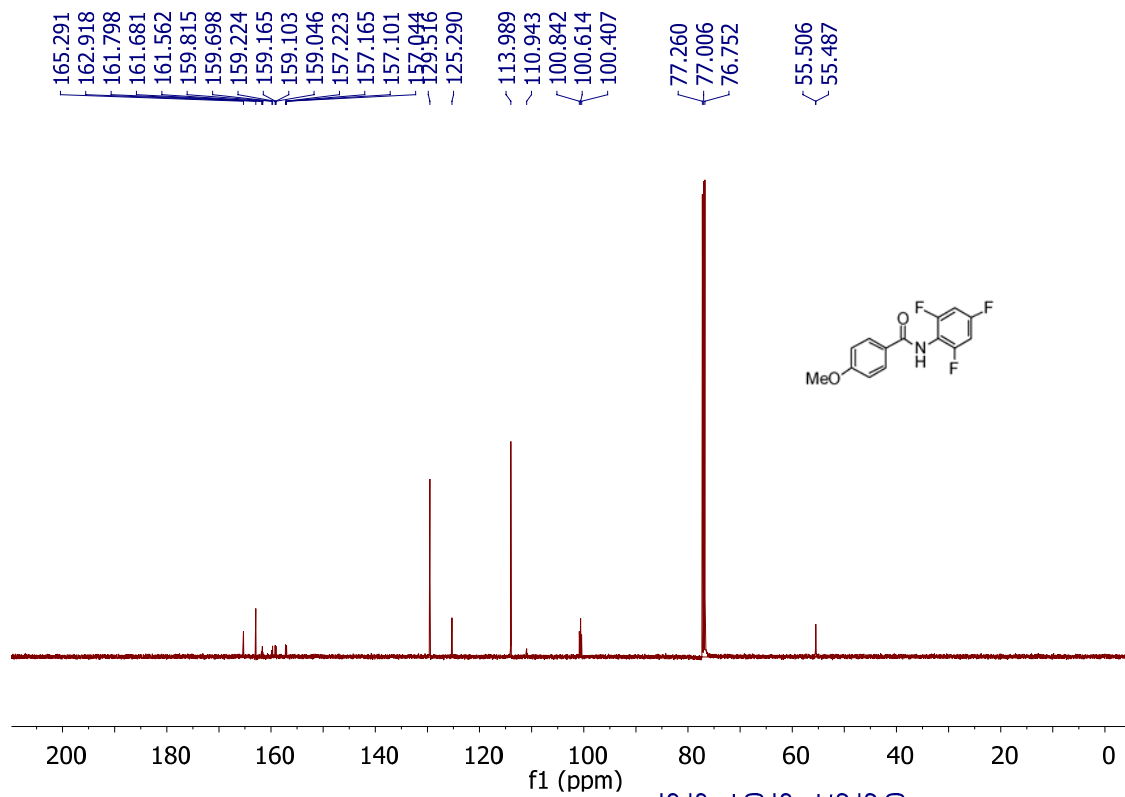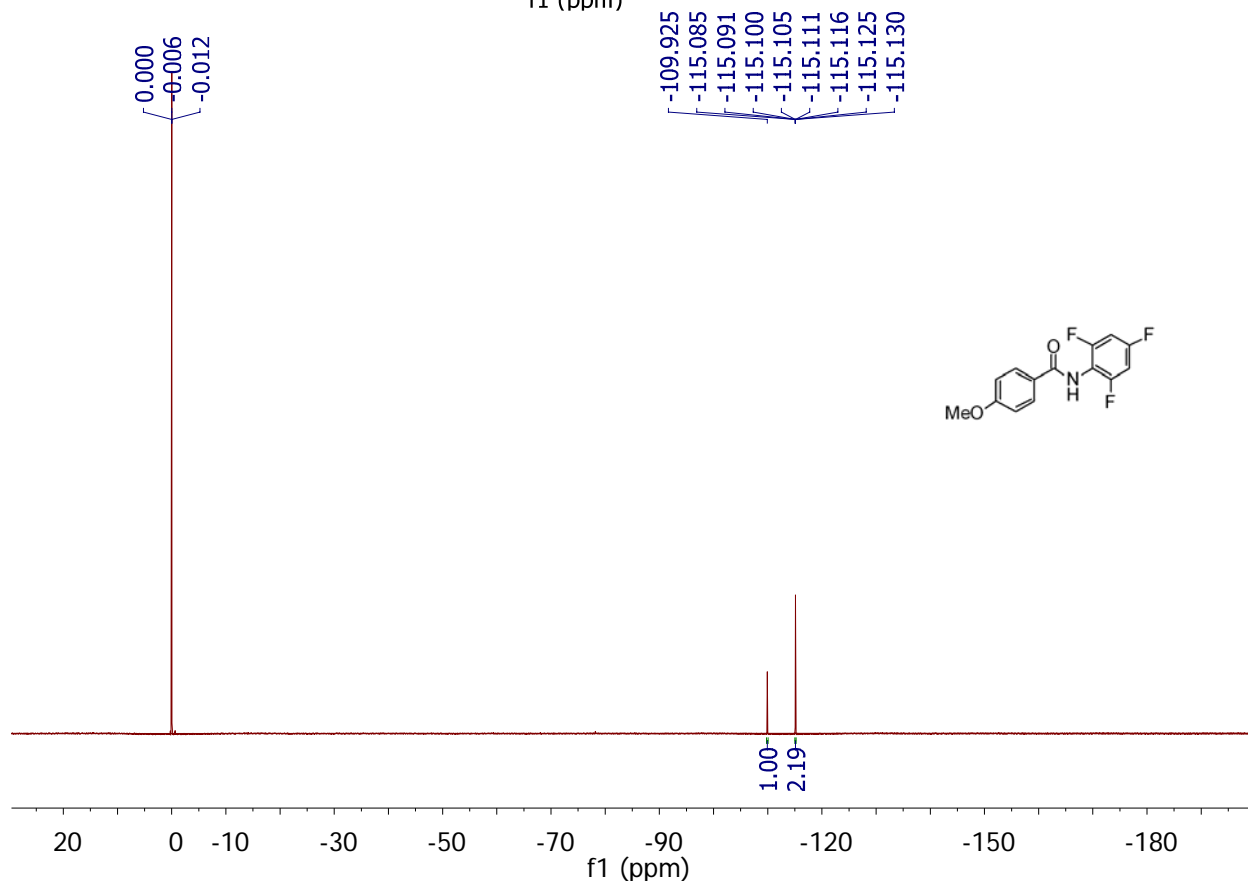

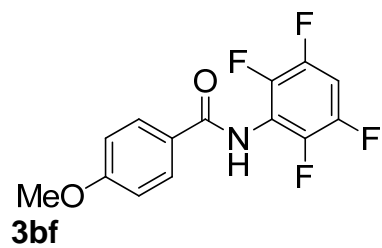

**NMR of compound 3bf**

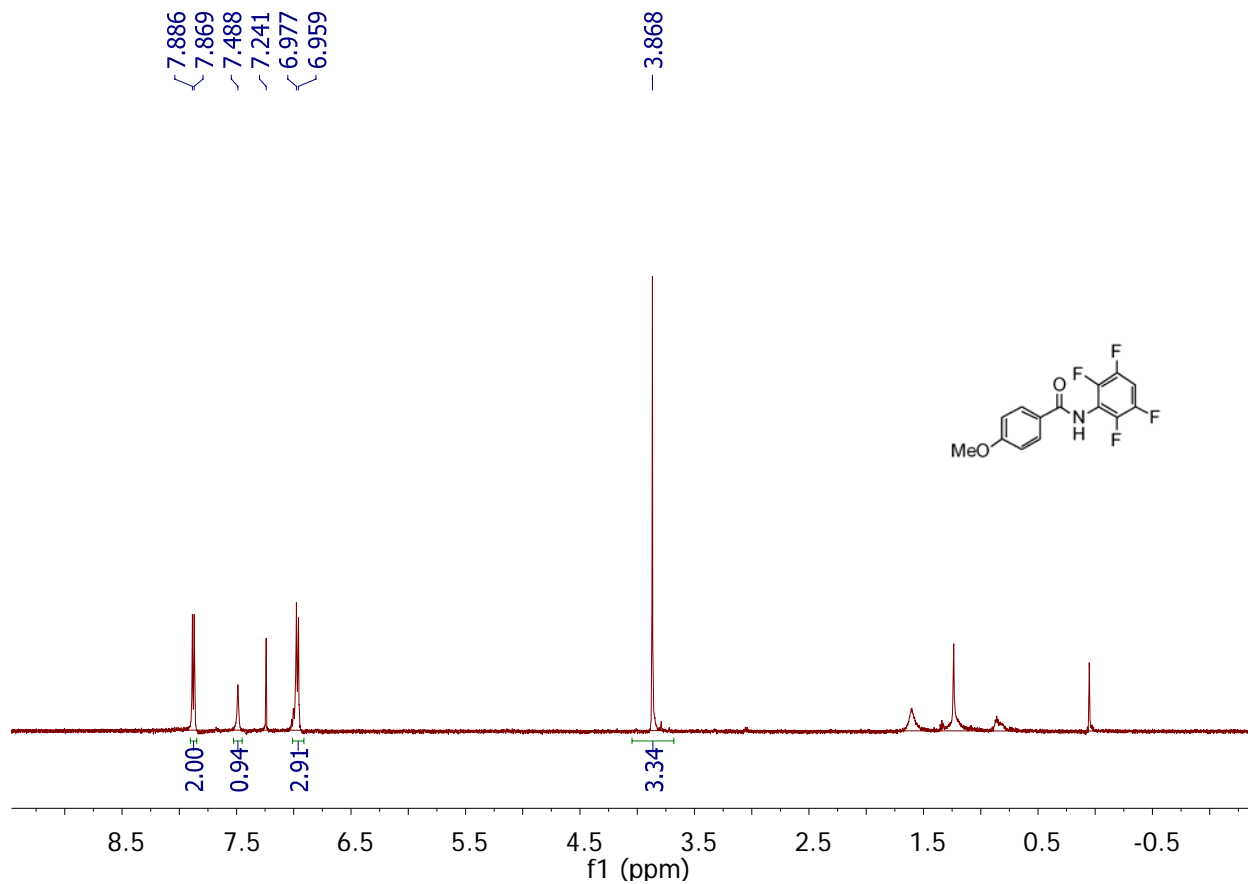



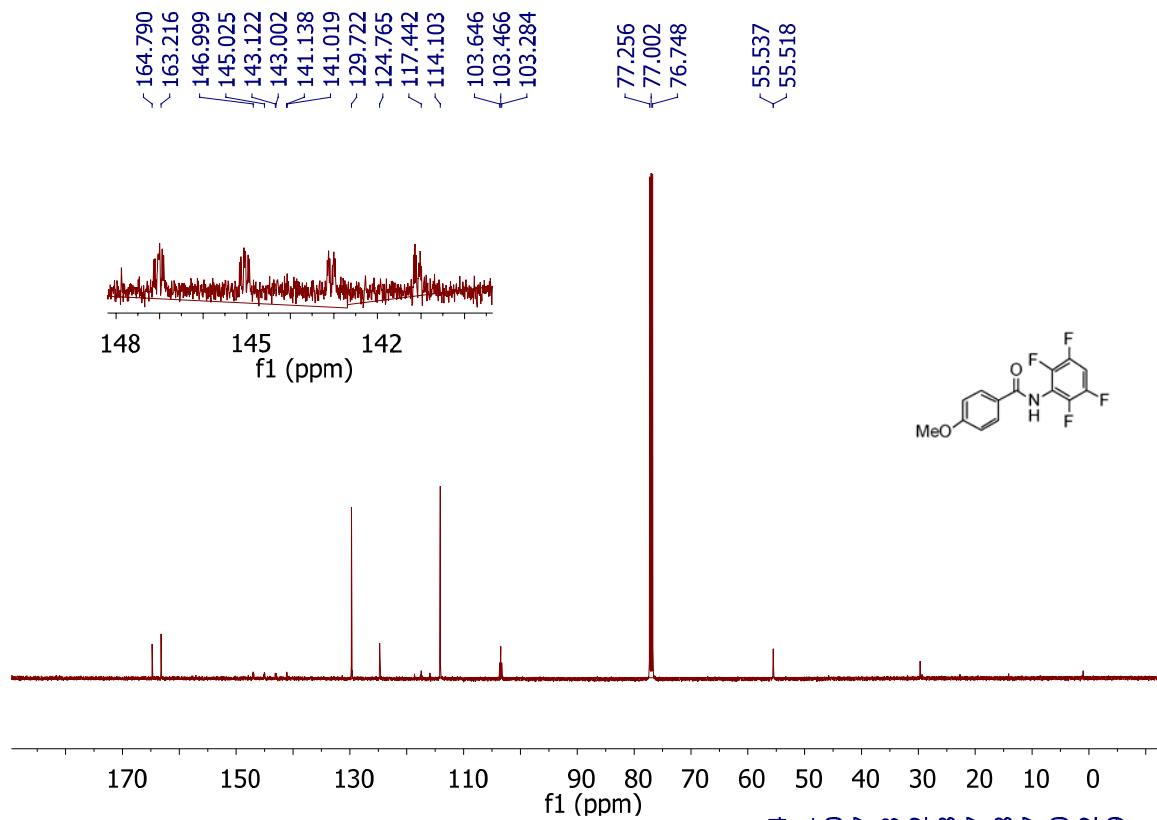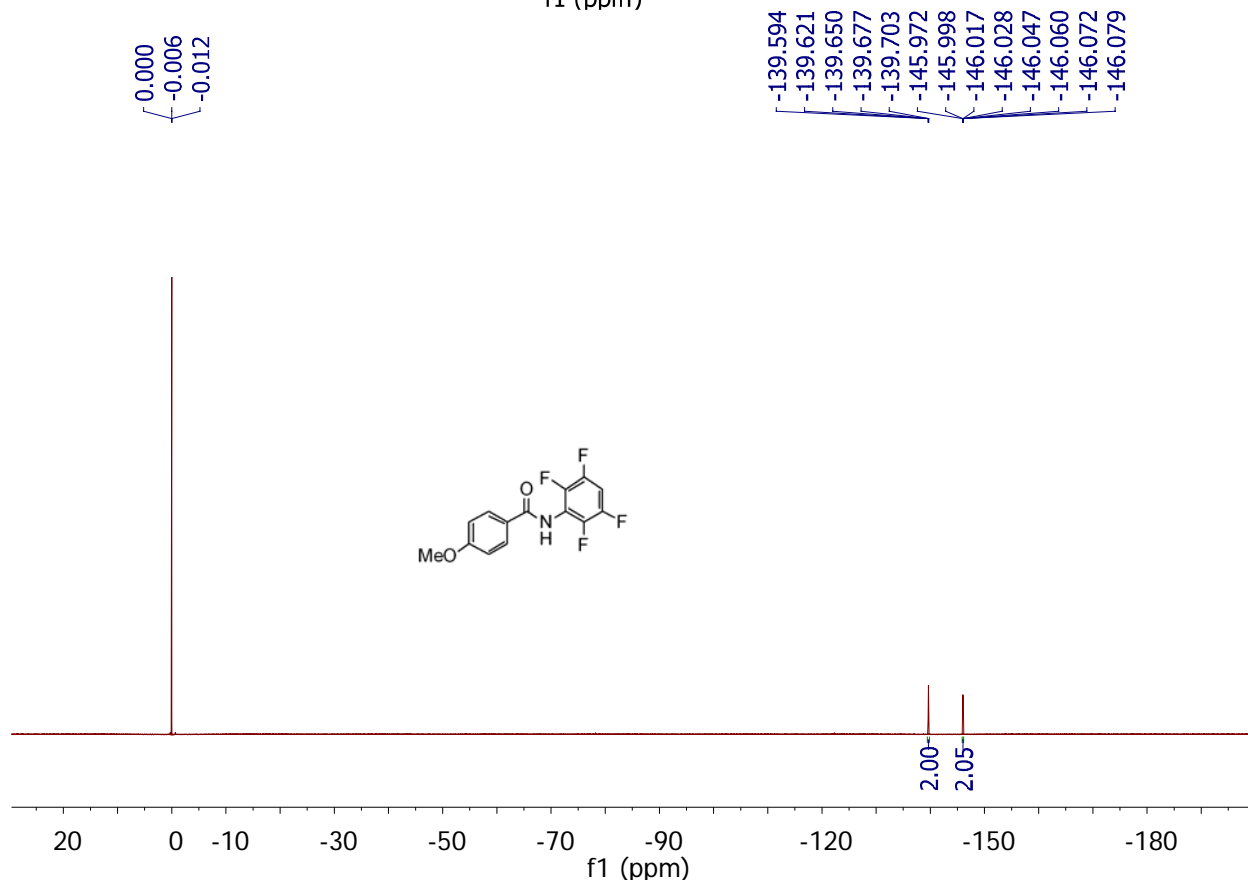

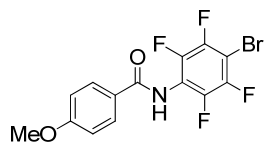

**3bg**

**NMR of compound 3bg**

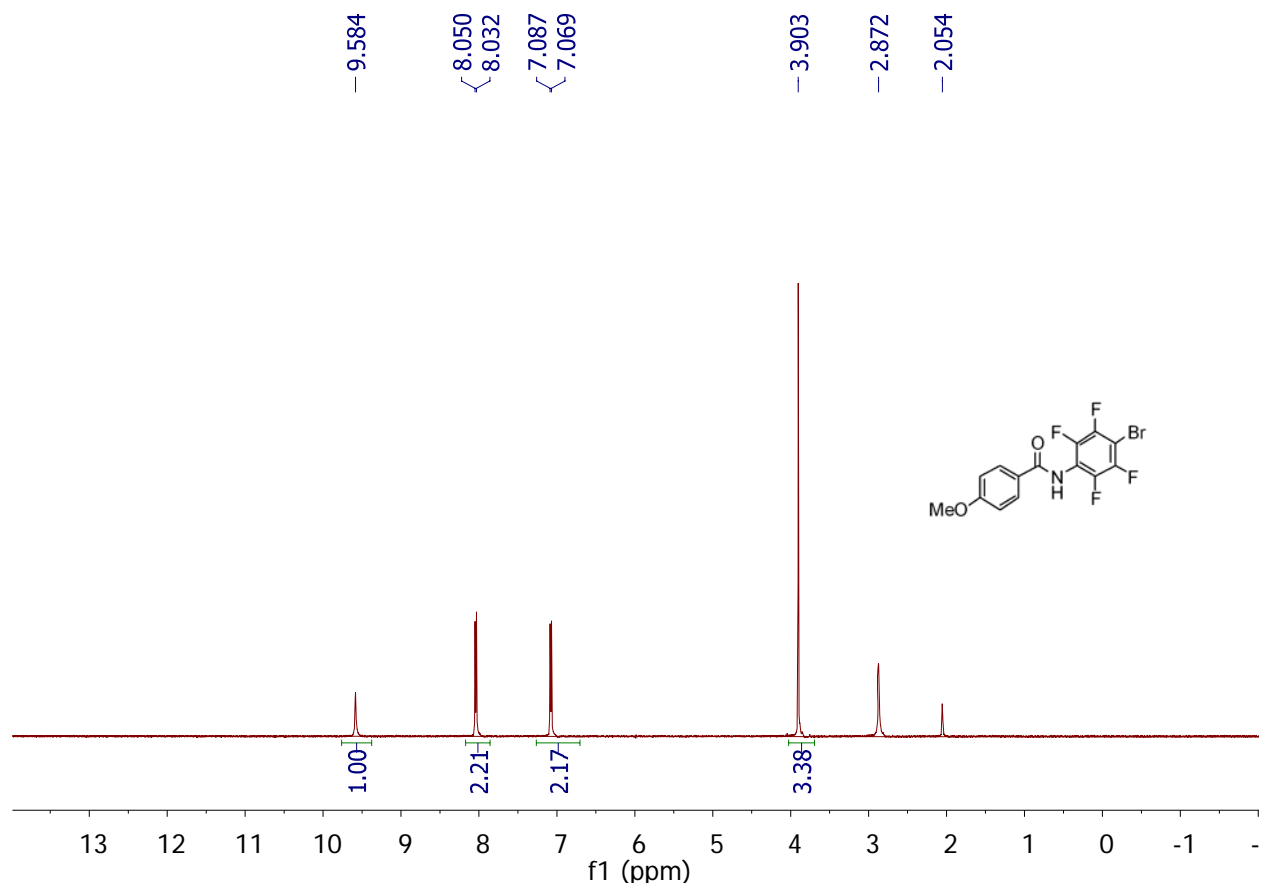

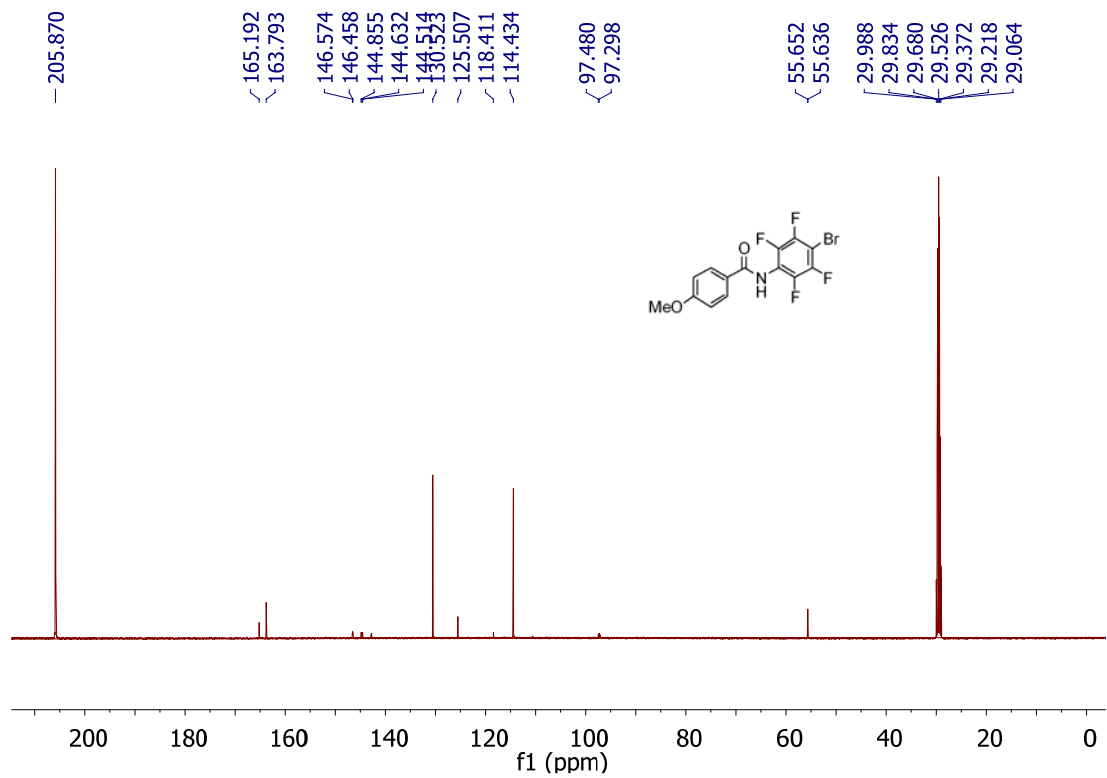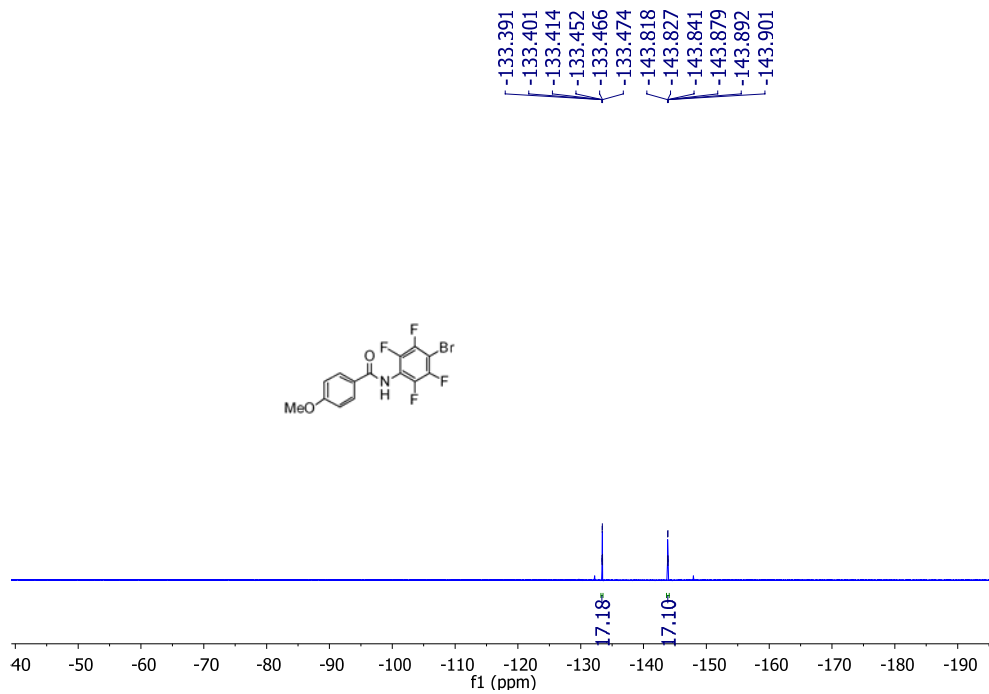

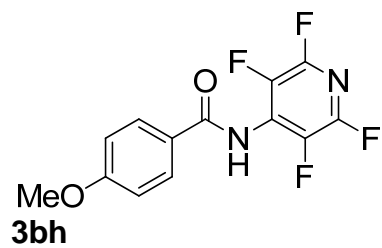

**NMR of compound 3bh**

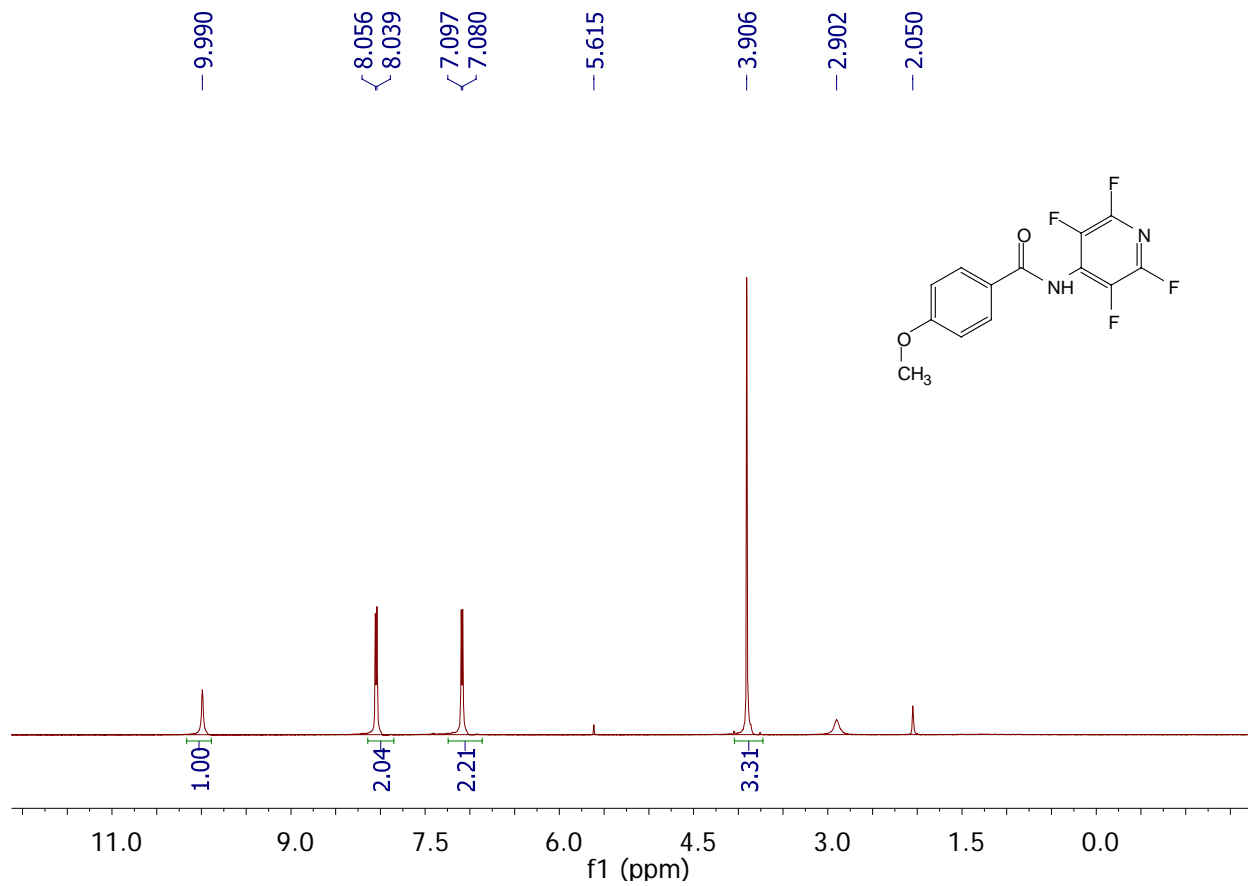

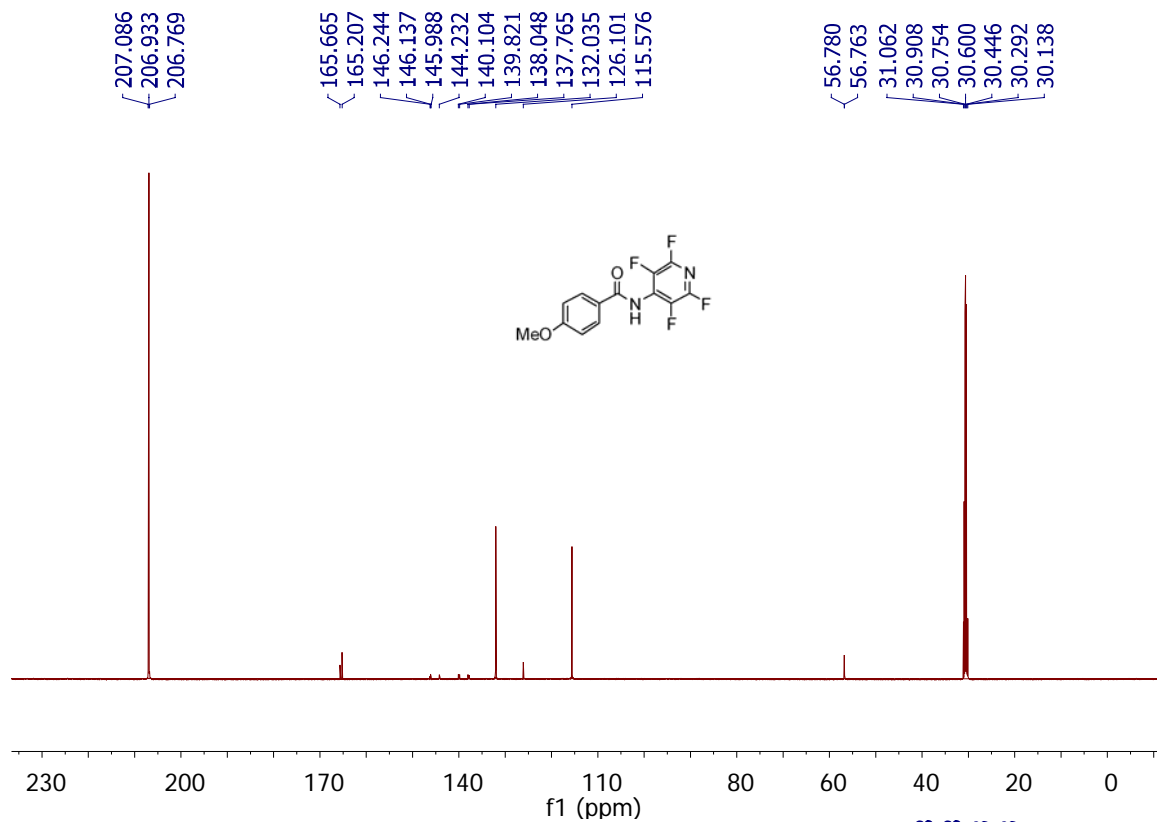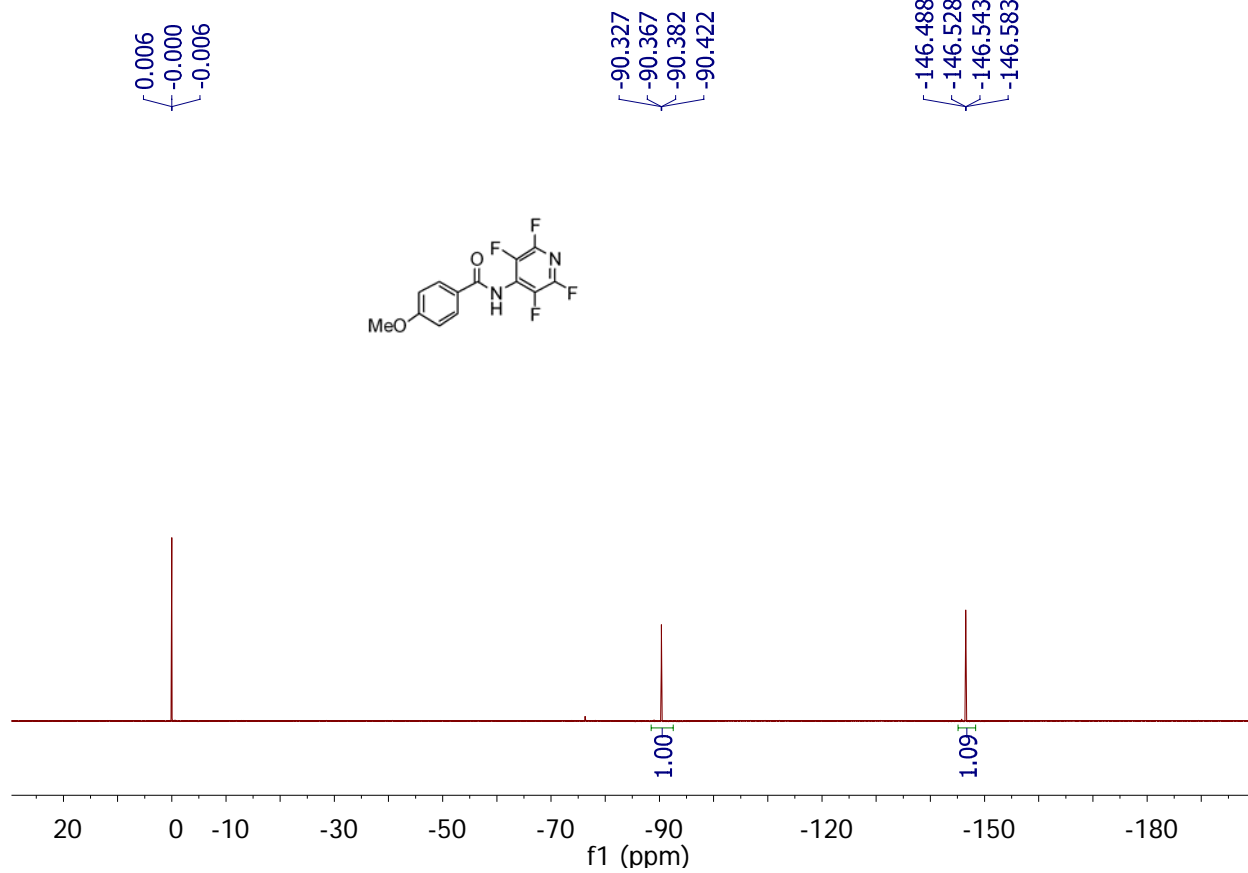

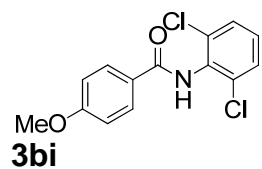

**NMR of compound 3bi**

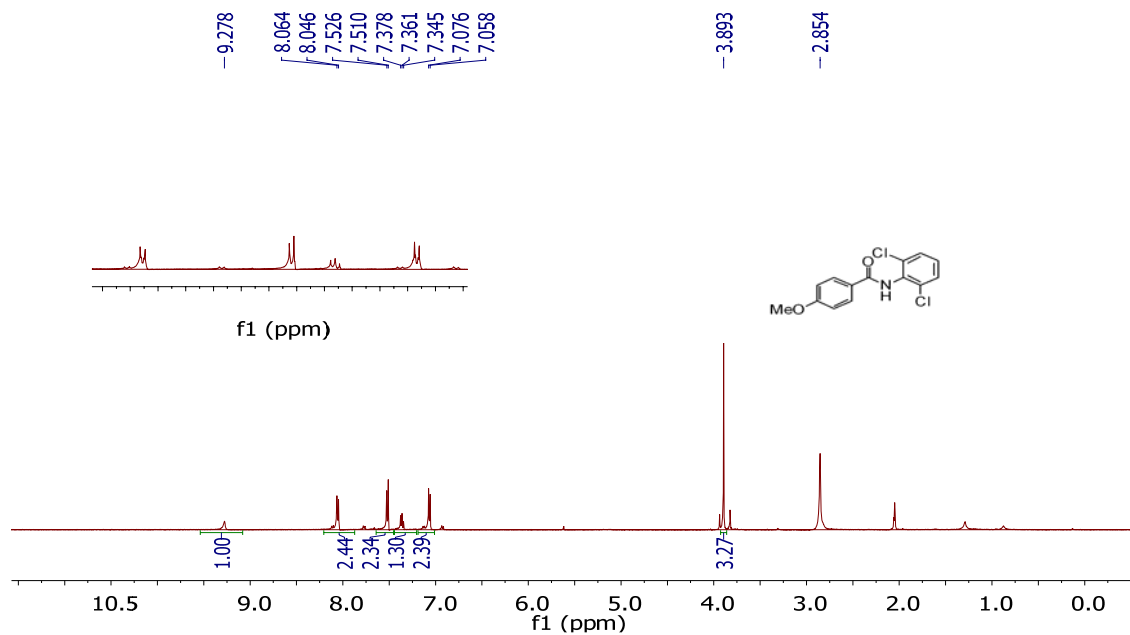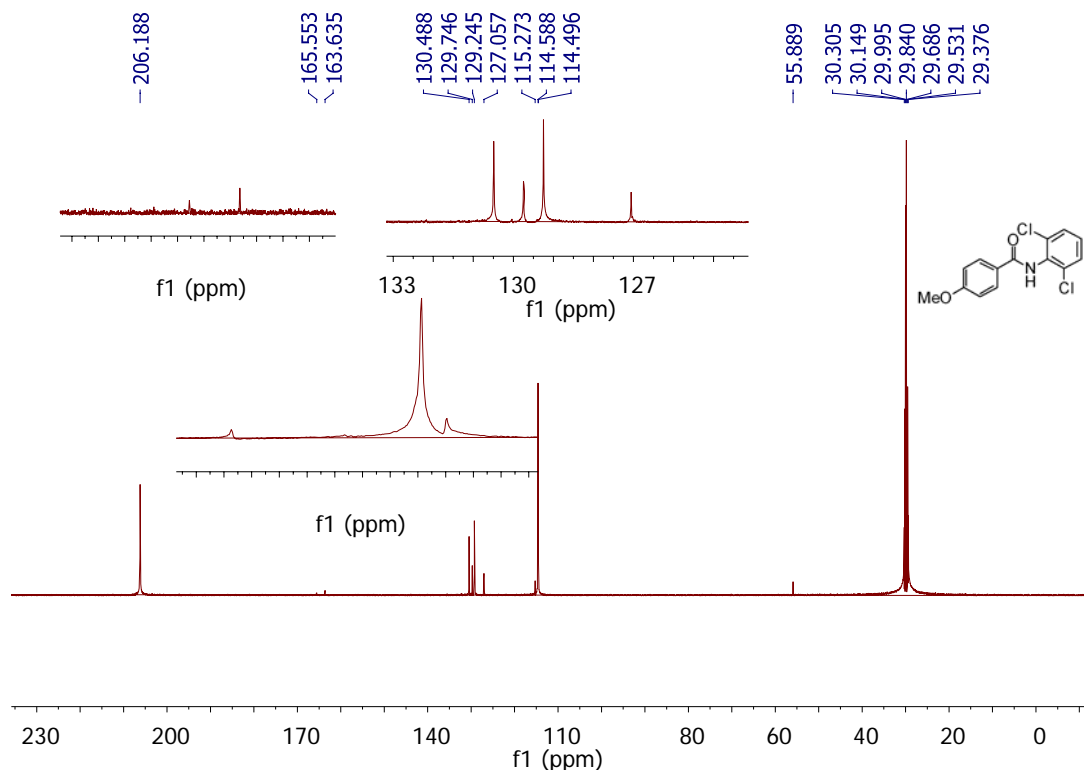

Compound 3z'a

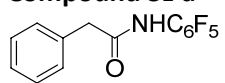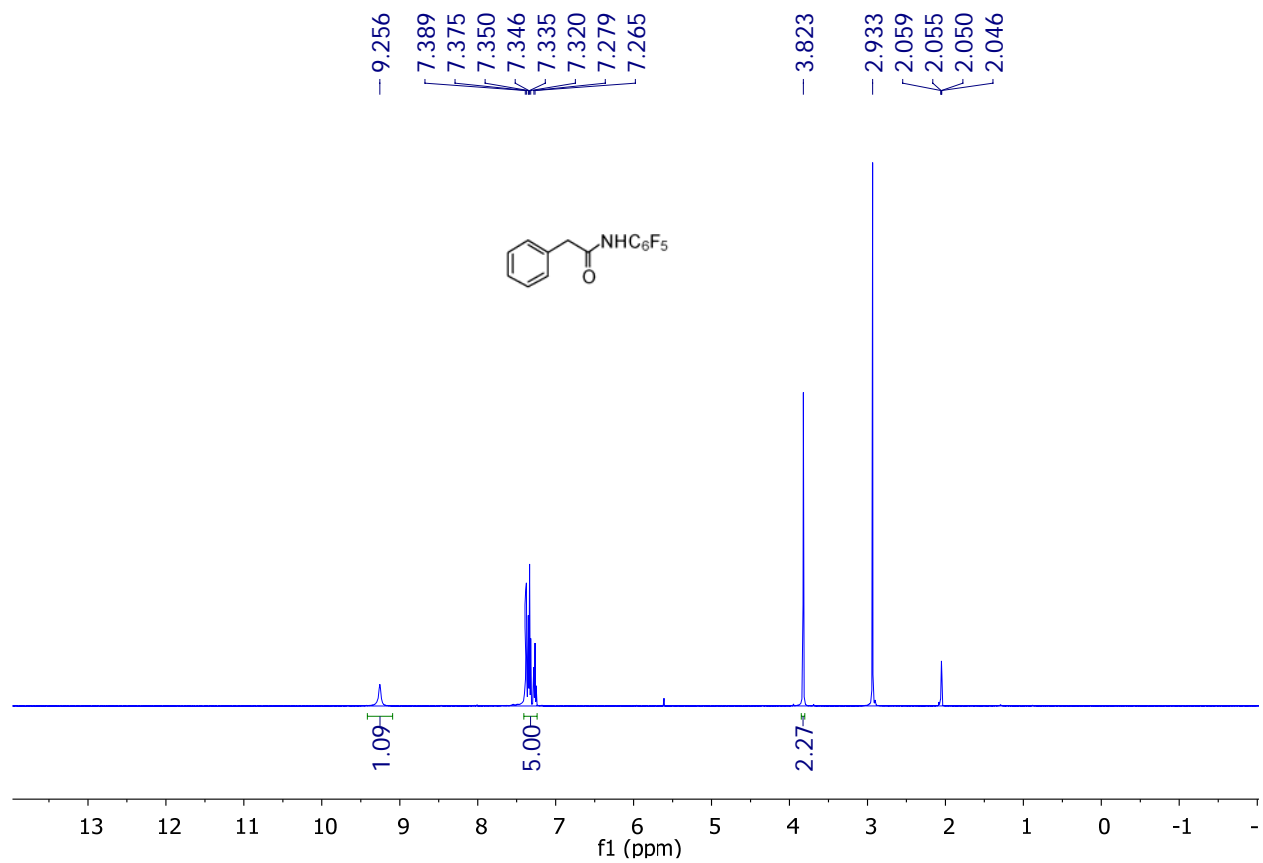

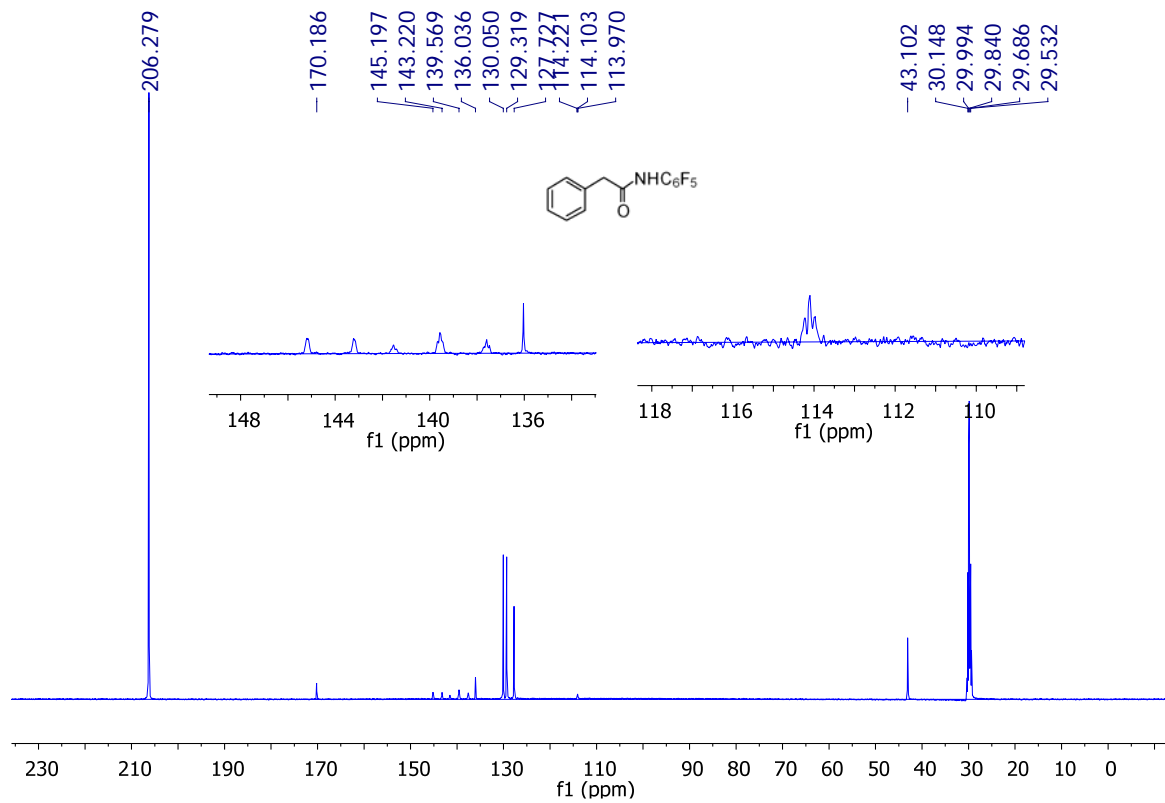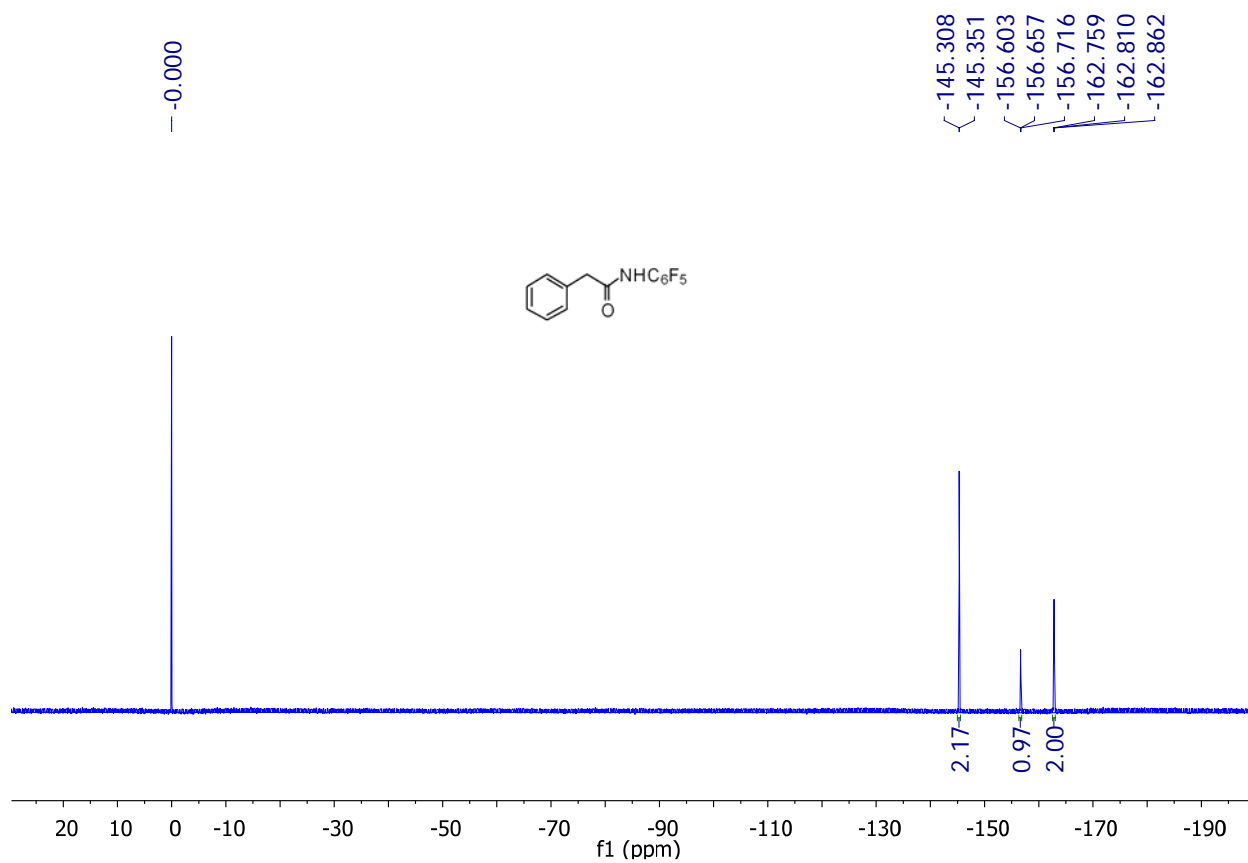



Compound 5

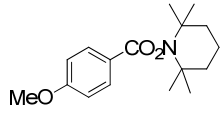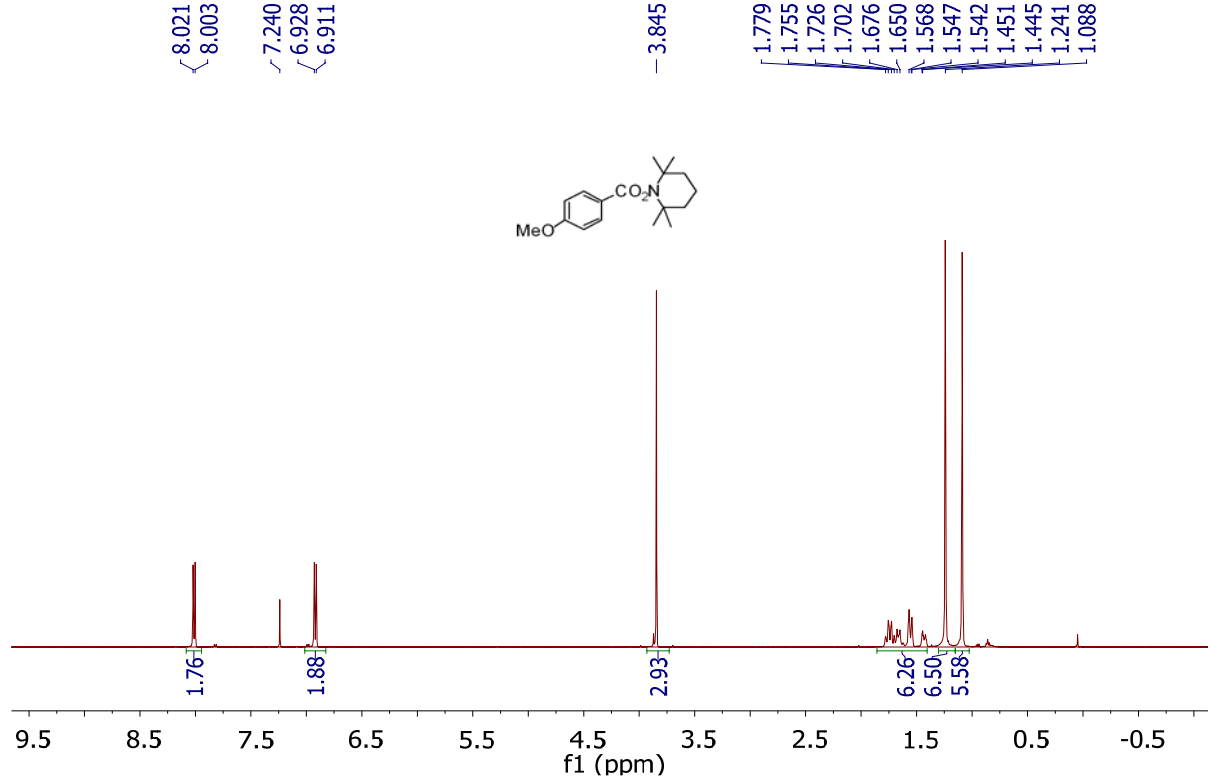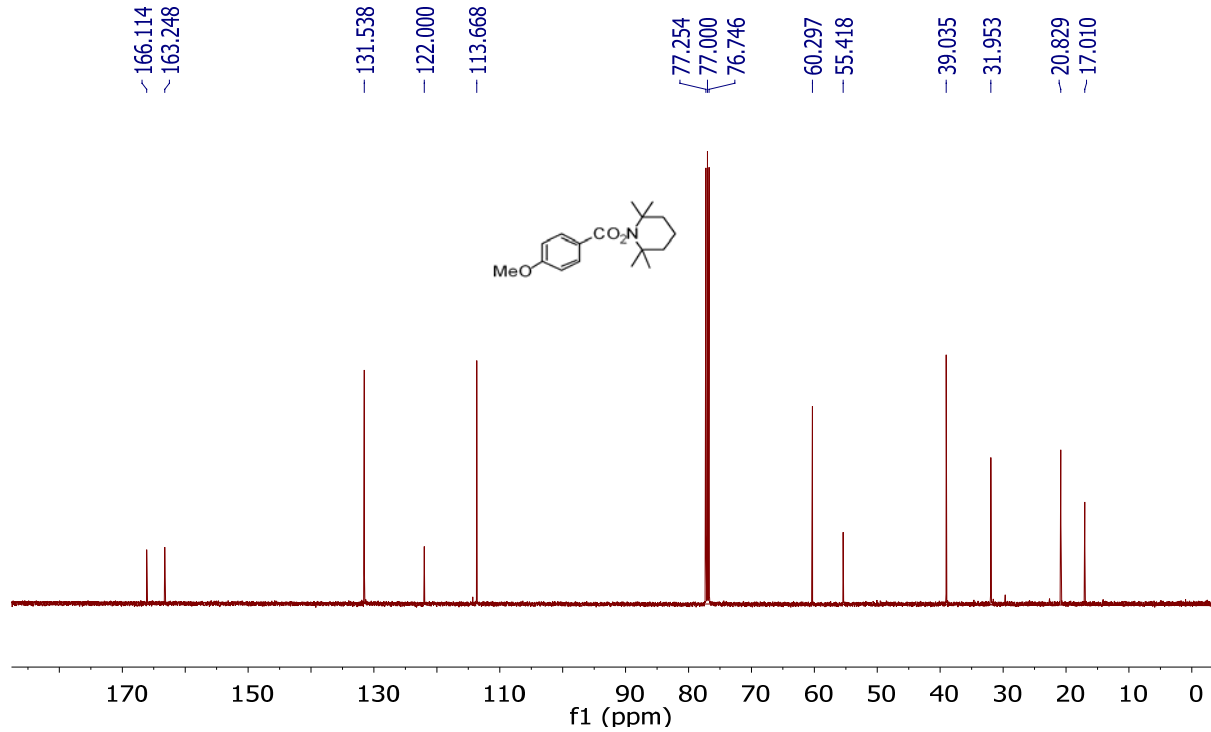

Supplement: NIHMS586867-supplement-ESI_2.pdf [file NIHMS586867-supplement-ESI_2.pdf]
